# Supplementary material for: Pd-catalyzed annulation of imidazo[1,2-a]pyridines with coumarins and indoles: synthesis of benzofuran and indole fused heterocycles
Source: Royal Society of Chemistry journal article supplement (doi:10.1039/d1cc06803b), 2021-12-24
Supplement: d1cc06803b1.pdf [file d1cc06803b1.pdf]

# **Pd-Catalyzed annulation of imidazo[1,2-a]pyridines with coumarins and indoles: Synthesis of benzofuran and indole fused heterocycles**

Rashmi Semwal, Gaurav Badhani and Subbarayappa Adimurthy\*

<sup>a</sup>Academy of Scientific & Innovative Research, Ghaziabad; CSIR–Central Salt & Marine Chemicals Research Institute, G. B. Marg, Bhavnagar-364 002. Gujarat (INDIA).

E-mail: [adimurthy@csmcri.res.in](mailto:adimurthy@csmcri.res.in)

## **Table of Content**

| <b>S.No</b> | <b>Content</b>                                                | <b>Page Numbers</b> |
|-------------|---------------------------------------------------------------|---------------------|
| 1           | Experimental Section                                          | S2-S3               |
| 2           | Optimization table for <b>3a</b> and <b>5a</b>                | S4-S5               |
| 3           | Mechanism for <b>5a</b>                                       | S5                  |
| 4           | Crystal structure data for <b>3aa</b> and <b>5e</b>           | S6-S8               |
| 5           | Photo physical data                                           | S9-S10              |
| 6           | Characterization data                                         | S11-S29             |
| 7           | References                                                    | S-29                |
| 8           | <sup>1</sup> H, <sup>13</sup> C & <sup>19</sup> F NMR spectra | S30-S83             |

## Experimental Section:

**General:** All commercially available chemicals and reagents were used without any further purification unless otherwise indicated.  $^1\text{H}$  and  $^{13}\text{C}$  {H} NMR spectra were recorded at 600/500, and 150/125 MHz, respectively. The spectra were recorded in  $\text{CDCl}_3$  as solvent. Multiplicity was indicated as follows: s (singlet); d (doublet); t (triplet); m (multiplet); dd (doublet of doublets), etc. and coupling constants (J) were given in Hz. Chemical shifts are reported in ppm relative to TMS as an internal standard for  $^1\text{H}$  NMR.  $^{19}\text{F}$  NMR (564 MHz) chemical shifts were reported in ppm ( $\delta$ ) ( $\text{CF}_3\text{COOH}$  as an outside standard). The peaks around delta values of  $^1\text{H}$  NMR (7.26), and  $^{13}\text{C}$  {H} NMR (77.0) are deuterated solvent chloroform, [ $\delta$  value around (1.5) in  $^1\text{H}$  NMR is of water]. Mass spectra were obtained using electron impact (EI) ionization method. Progress of the reactions were monitored by thin layer chromatography (TLC). All products were purified through column chromatography using silica gel 100-200 mesh size using hexane/ethyl acetate as eluent, unless otherwise indicated.

### General procedure for the synthesis of 2-phenylimidazo[1,2-a]pyridine (**1a**)<sup>1</sup>:

470 mg (5.0 mmol) of 2-aminopyridine, 1200 mg (10 mmol) of acetophenone, CuI 5 mol% (47 mg; 0.25 mmol),  $\text{BF}_3 \cdot \text{Et}_2\text{O}$  (45–50% purity); 10 mol%, (0.5 mmol) and DMF (2 mL) were placed in a 25-mL double-necked round-bottomed flask. The mixture was heated in oil bath at 60 °C for 24 h under an oxygen atmosphere (balloon). After completion of the reaction, it was allowed to attain to room temperature and then the mixture was poured into 20 mL of sodium carbonate solution. The product was extracted with DCM (50 mL X 3) and dried with anhydrous  $\text{Na}_2\text{SO}_4$ . Removal of the solvent under reduced pressure and the left residue that was purified through column chromatography using silica gel (30% EtOAc/hexane) to afford **1a**; yield: 0.799 g (82%) experimental data also matched with reported literature and the same method was applied for all the reported starting substrates.<sup>1</sup>

### General procedure for the synthesis of 1-phenylbenzofuro[3,2-a]imidazo[5,1,2-cd]indolizine (**3a**):

To a reaction tube equipped with a magnetic stir bar, added 2-phenylimidazo[1,2-a]pyridine (**1a**) (39 mg, 0.20 mmol), coumarin (**2a**) (58.4 mg, 0.40 mmol), Copper(II) trifluoroacetate hydrate (115.8 mg, 0.40 mmol), 1,10 Phenanthroline monohydrate (19.8 mg, 0.50 mmol) and  $\text{Pd}(\text{OAc})_2$  (8.96 mg, 0.02 mmol) and charged with 4° MS in 1.5 mL of dry DMF solvent. The mixture was heated in an oil bath at 130 °C in a closed tube. Reaction was monitored by TLC, after completion of the reaction; it was allowed to attain room temperature. Then the mixture was poured into 20 mL of water and the product was extracted with EtOAc. The combined organic layers were dried over anhydrous  $\text{Na}_2\text{SO}_4$  and

solvent was removed under vacuum. The crude residue left out was purified by silica gel column chromatography using 15 % EtOAc/hexane to afford **3a** (49.2 mg; 80 % yield).

**General procedure for the synthesis of 6-methyl-1-phenyl-6H-imidazo[5',1',2':3,4,5]indolizino[1,2-b]indole (5a):** To a reaction tube equipped with a magnetic stir bar, added 2-phenylimidazo[1,2-a]pyridine (**1a**) (39 mg, 0.20 mmol), 1-methyl-1H-indole (**4a**) (52.4 mg, 0.40 mmol), Copper(II) trifluoroacetate hydrate (115.8 mg, 0.40 mmol), 1,10 Phenanthroline monohydrate (19.8 mg, 0.50 mmol), Pd(OAc)<sub>2</sub> (8.96 mg, 0.02 mmol) and Cs<sub>2</sub>CO<sub>3</sub> (130 mg; 0.40 mmol) in 1.5 mL of dry DMF solvent. The mixture was heated in an oil bath at 130 °C in a closed tube. Reaction was monitored by TLC, after completion of the reaction; it was allowed to attain room temperature. Then the mixture was poured into 20 mL of water and the product was extracted with EtOAc. The combined organic layers were dried over anhydrous Na<sub>2</sub>SO<sub>4</sub> and solvent was removed under vacuum. The crude residue was purified by silica gel column chromatography using 30 % EtOAc/hexane to afford **5a** (46.8 mg; 75 % yield).

**Table S1: Optimization conditions for 3a<sup>a</sup>**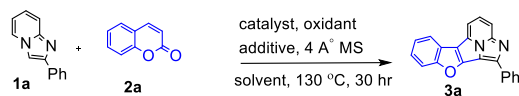

| S. No. | Catalyst                                           | Oxidant                                | Additive (mmol)                        | Yield (%) |
|--------|----------------------------------------------------|----------------------------------------|----------------------------------------|-----------|
| 1      | Pd(OAc) <sub>2</sub>                               | Cu(OAc) <sub>2</sub> .H <sub>2</sub> O | -                                      | trace     |
| 2      | Pd(OAc) <sub>2</sub>                               | Cu(OAc) <sub>2</sub> .H <sub>2</sub> O | KOtBu(0.40)                            | 25        |
| 3      | Pd(OAc) <sub>2</sub>                               | Cu(OAc) <sub>2</sub> .H <sub>2</sub> O | NaOtBu(0.40)                           | 30        |
| 4      | Pd(OAc) <sub>2</sub>                               | Cu(OAc) <sub>2</sub> .H <sub>2</sub> O | DMAP(0.40)                             | 35        |
| 5      | Pd(OAc) <sub>2</sub>                               | Cu(OAc) <sub>2</sub> .H <sub>2</sub> O | Cs <sub>2</sub> CO <sub>3</sub> (0.40) | nr        |
| 6      | Pd(OAc) <sub>2</sub>                               | Cu(OAc) <sub>2</sub> .H <sub>2</sub> O | DBU(0.40)                              | nr        |
| 7      | Pd(OAc) <sub>2</sub>                               | Cu(TFA) <sub>2</sub> .H <sub>2</sub> O | KOtBu(0.40)                            | 40        |
| 8      | Pd(OAc) <sub>2</sub>                               | Cu(TFA) <sub>2</sub> .H <sub>2</sub> O | NaOtBu(0.40)                           | 42        |
| 9      | Pd(OAc) <sub>2</sub>                               | Cu(TFA) <sub>2</sub> .H <sub>2</sub> O | DMAP(0.40)                             | 35        |
| 10     | Pd(OAc) <sub>2</sub>                               | Cu(TFA) <sub>2</sub> .H <sub>2</sub> O | Cs <sub>2</sub> CO <sub>3</sub> (0.40) | nr        |
| 11     | Pd(OAc) <sub>2</sub>                               | Cu(TFA) <sub>2</sub> .H <sub>2</sub> O | DBU(0.40)                              | nr        |
| 12     | PdCl <sub>2</sub> (PPh <sub>3</sub> ) <sub>2</sub> | Cu(TFA) <sub>2</sub> .H <sub>2</sub> O | phen(0.05)                             | nr        |
| 13     | PdCl <sub>2</sub>                                  | Cu(TFA) <sub>2</sub> .H <sub>2</sub> O | phen(0.05)                             | nr        |
| 14     | PdBr <sub>2</sub>                                  | Cu(TFA) <sub>2</sub> .H <sub>2</sub> O | phen(0.05)                             | nr        |
| 15     | PdI <sub>2</sub>                                   | Cu(TFA) <sub>2</sub> .H <sub>2</sub> O | phen(0.05)                             | nr        |
| 16     | Pd(TFA) <sub>2</sub>                               | Cu(TFA) <sub>2</sub> .H <sub>2</sub> O | phen(0.05)                             | 50        |
| 17     | -                                                  | Cu(TFA) <sub>2</sub> .H <sub>2</sub> O | phen(0.05)                             | nr        |

<sup>a</sup>Reaction Conditions **1a** (0.20 mmol), **2a** (0.40 mmol), catalyst (0.02 mmol), Oxidant (0.40 mmol), Additive, 4 Å MS, DMF (1.5 ml) 130 °C, 30 hr.

**Table S2: Optimization conditions for 5a<sup>a</sup>**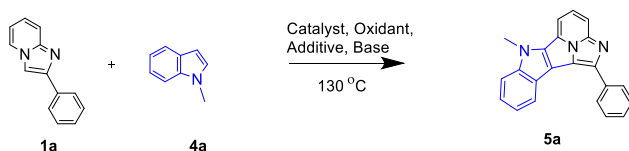

| S. No. | Base (equiv)                        | Yield (%)       |
|--------|-------------------------------------|-----------------|
| 1      | K <sub>2</sub> CO <sub>3</sub> (2)  | 50              |
| 2      | NaHCO <sub>3</sub> (2)              | 45              |
| 3      | Na <sub>2</sub> CO <sub>3</sub> (2) | 40              |
| 4      | DBU (2)                             | nr              |
| 5      | NaH (2)                             | 55              |
| 6      | Cs <sub>2</sub> CO <sub>3</sub> (2) | 75              |
| 7      | Cs <sub>2</sub> CO <sub>3</sub> (2) | 70 <sup>b</sup> |
| 8      | Cs <sub>2</sub> CO <sub>3</sub> (2) | 50 <sup>c</sup> |

<sup>a</sup>Reaction Conditions **1a** (0.20 mmol), **4a** (0.40 mmol), Catalyst Pd(OAc)<sub>2</sub> (0.02 mmol), Oxidant Cu(TFA)<sub>2</sub>.H<sub>2</sub>O(0.40 mmol), Additive phen (0.05 mmol), Base (0.40 mmol),<sup>b</sup>Reaction under N<sub>2</sub> atm,<sup>c</sup>Reaction under O<sub>2</sub> atm, 130 °C, 36 h.

Further we explored this reaction conditions with the indole derivatives (Table S2). Initially we applied same reaction condition with the indole derivatives which is same for the coumarin derivatives. But unfortunately we did not get any annulated product. After adding base to the reaction, the reaction proceeds. So base is major requirement for obtaining the annulated product. Then we optimized the reaction with different bases such as  $K_2CO_3$ ,  $NaHCO_3$ ,  $Na_2CO_3$ , DBU and NaH but we did not get affective yield for the annulated product (entry 1 to 5). Upon changing the base to the  $Cs_2CO_3$  we got 75% of the desired annulated product (entry 6). Again when we performed the reaction in presence of nitrogen and oxygen atmosphere, it does not improve the yield of reaction (entry 7 and 8).

### Scheme S1: Mechanistic pathway for 5a

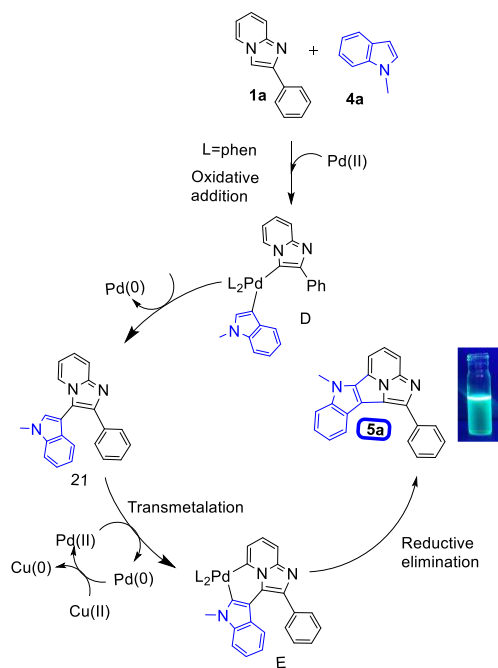

**Fig. S1. Thermal ellipsoid plot for the crystal structure 3aa**

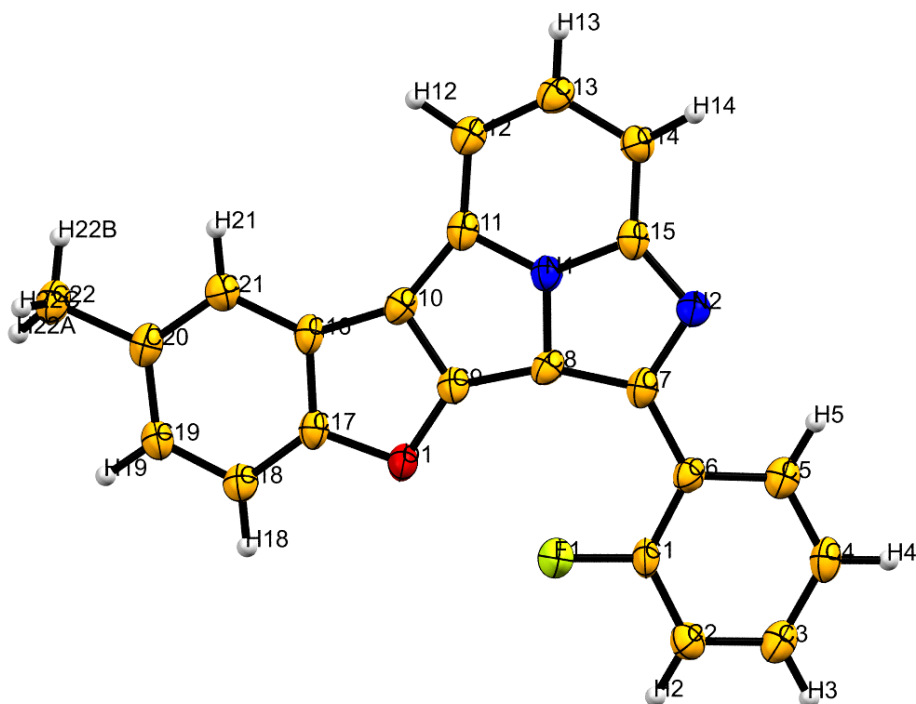

Single crystal XRD of 3aa CCDC:2124566

**Fig. S2 Thermal ellipsoid plot for the crystal structure 5e**

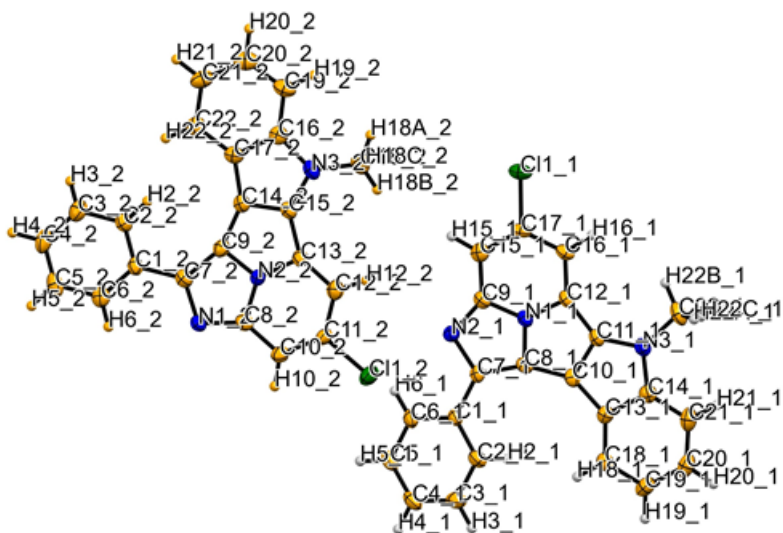

Single crystal XRD of 5e (CCDC: 2124567)

## Crystal Data and Refinement Parameters

### Experimental: X-ray part

Crystal of suitable size was selected for the organic compound, immersed in paraffin oil and then mounted on the tip of a glass fiber using epoxy resin. Intensity data for all four crystals were collected at 100 and 150 K using graphite monochromatised MoK $\alpha$  ( $\alpha = 0.71073\text{\AA}$ ) radiation on diffractometer equipped with CCD area detector. The data integration and reduction were processed.<sup>1</sup> An empirical absorption correction was applied to the collected reflections.<sup>2</sup> The structures were solved by direct methods<sup>3</sup> and refined on  $F^2$  by the full-matrix least-squares technique<sup>4</sup> package. Graphics are generated.<sup>5,6</sup> Non-hydrogen atoms were refined anisotropically till convergence is reached and the hydrogen atoms of the organic compound is stereochemically fixed. Crystallographic parameters for the compound is given in Table S4.

1. Sheldrick, G. M.; SAINT 5.1 ed.; Siemens Industrial Automation Inc.: Madison, WI, 1995.
2. SADABS, Empirical Absorption Correction Program; University of Göttingen: Göttingen, Germany 1997.
3. Sheldrick, G. M.; SHELXTL Reference Manual: Version 5.1; Bruker AXS: Madison, WI 1997.
4. Sheldrick, G.M. SHELXL-97: Program for Crystal Structure Refinement; University of Göttingen: Göttingen, Germany (1997).
5. A.L.Spek, Acta Cryst. 2009, D65, 148-155
6. Mercury 1.3, Supplied with Cambridge Structural Database; CCDC: Cambridge, U.K., (2003).

**Table S3.** Crystal Data and Refinement Parameters for Compounds **3aa** and **5e**

| Identification code                         | 3aa                                                           | 5e                                                            |
|---------------------------------------------|---------------------------------------------------------------|---------------------------------------------------------------|
| Empirical formula                           | C <sub>22</sub> H <sub>14</sub> ClN <sub>3</sub>              | C <sub>22</sub> H <sub>13</sub> FN <sub>2</sub> O             |
| Formula weight                              | 355.81                                                        | 340.34                                                        |
| Temperature/K                               | 150(2)                                                        | 100(2)                                                        |
| Crystal system                              | monoclinic                                                    | Monoclinic                                                    |
| Space group                                 | Pc                                                            | P2 <sub>1</sub> /n                                            |
| a/Å                                         | 17.667(2)                                                     | 11.213(4)                                                     |
| b/Å                                         | 13.2247(15)                                                   | 7.512(2)                                                      |
| c/Å                                         | 7.1270(7)                                                     | 18.352(6)                                                     |
| α/°                                         | 90                                                            | 90                                                            |
| β/°                                         | 98.212(5)                                                     | 95.058(11)                                                    |
| γ/°                                         | 90                                                            | 90                                                            |
| Volume/Å <sup>3</sup>                       | 1648.1(3)                                                     | 1539.7(9)                                                     |
| Z                                           | 4                                                             | 4                                                             |
| ρ <sub>calc</sub> /cm <sup>3</sup>          | 1.434                                                         | 1.468                                                         |
| μ/mm <sup>-1</sup>                          | 0.242                                                         | 0.100                                                         |
| F(000)                                      | 736.0                                                         | 704.0                                                         |
| Crystal size/mm <sup>3</sup>                | 0.226 × 0.125 × 0.027                                         | 0.206 × 0.111 × 0.024                                         |
| Radiation                                   | MoKα (λ = 0.71073)                                            | MoKα (λ = 0.71073)                                            |
| 2θ range for data collection/°              | 3.862 to 55.152                                               | 4.102 to 47.194                                               |
| Index ranges                                | -22 ≤ h ≤ 22, -17 ≤ k ≤ 17, -7 ≤ l ≤ 9                        | -12 ≤ h ≤ 12, -8 ≤ k ≤ 8, -20 ≤ l ≤ 18                        |
| Reflections collected                       | 33131                                                         | 17598                                                         |
| Independent reflections                     | 7145 [R <sub>int</sub> = 0.1367, R <sub>sigma</sub> = 0.1106] | 2315 [R <sub>int</sub> = 0.1495, R <sub>sigma</sub> = 0.0953] |
| Data/restraints/parameters                  | 7145/2/471                                                    | 2315/0/236                                                    |
| Goodness-of-fit on F <sup>2</sup>           | 0.999                                                         | 1.085                                                         |
| Final R indexes [I ≥ 2σ (I)]                | R <sub>1</sub> = 0.0548, wR <sub>2</sub> = 0.1116             | R <sub>1</sub> = 0.0607, wR <sub>2</sub> = 0.1552             |
| Final R indexes [all data]                  | R <sub>1</sub> = 0.1066, wR <sub>2</sub> = 0.1328             | R <sub>1</sub> = 0.1202, wR <sub>2</sub> = 0.1928             |
| Largest diff. peak/hole / e Å <sup>-3</sup> | 0.30/-0.34                                                    | 0.26/-0.32                                                    |



## Photo Physical Data

Due to the highly fluorescence characteristic nature of the annulated products, we studied the photo physical properties of the hetero fused derivatives by recording the uv-visible and fluorescence spectra at low concentration of 10  $\mu\text{M}$  in DCM solution of the selected fluorophores. All the spectra were recorded by exciting at the respective wavelength and the fluorophore molecules showed emission spectra in the visible region 506-580 nm. These scaffolds may find applications as chemo sensors in the fields of molecular imaging, bioorganic chemistry, molecular recognition, analytical chemistry, materials chemistry and as well as in medicinal chemistry and biology.<sup>2</sup>

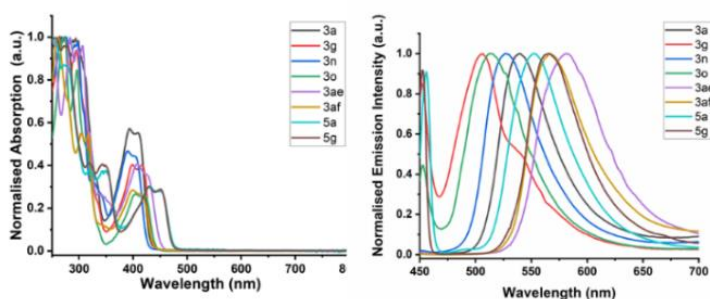

**Fig. S3** Normalized (a) absorption and (b) emission spectra of selected annulated products

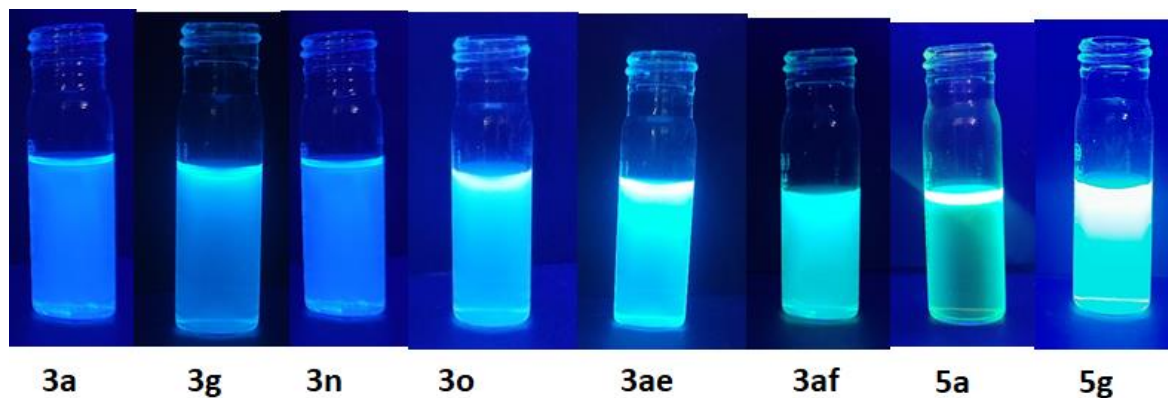

**Fig. S4** Digital photograph of the fluorescent imidazopyridines in DCM under UV light

**Table S4. Spectral properties of selected imidazopyridines in DCM at room temperature (10  $\mu$ M solution):**

| <b>Comp</b> | <b><math>\lambda_{\text{abs(max)}}</math><br/>nm</b> | <b><math>\lambda_{\text{ex(max)}}</math><br/>nm</b> | <b><math>\lambda_{\text{em(max)}}</math><br/>nm</b> | <b><math>\Delta_{\text{stokes}}</math><br/>nm</b> |
|-------------|------------------------------------------------------|-----------------------------------------------------|-----------------------------------------------------|---------------------------------------------------|
| 3a          | 394                                                  | 394                                                 | 539                                                 | 145                                               |
| 3g          | 398                                                  | 398                                                 | 506                                                 | 108                                               |
| 3n          | 390                                                  | 390                                                 | 527                                                 | 137                                               |
| 3o          | 403                                                  | 403                                                 | 514                                                 | 111                                               |
| 3ae         | 408                                                  | 408                                                 | 580                                                 | 172                                               |
| 3af         | 398                                                  | 398                                                 | 567                                                 | 169                                               |
| 5a          | 430                                                  | 430                                                 | 552                                                 | 122                                               |
| 5g          | 430                                                  | 430                                                 | 565                                                 | 135                                               |

## Characterization data:

### 1-phenylbenzofuro[3,2-a]imidazo[5,1,2-cd]indolizine (3a):

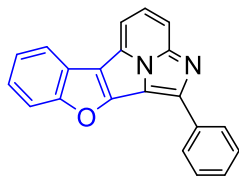

(Eluent: 15% EtOAc/hexane); 80% yield (49.2 mg); yellow solid, Mp: 208-210 °C; <sup>1</sup>H NMR (600 MHz, CDCl<sub>3</sub>) δ 8.59 (d, J = 8.1 Hz, 2H), 8.08 – 7.98 (m, 4H), 7.80 (d, J = 8.1 Hz, 1H), 7.66 (t, J = 7.5 Hz, 2H), 7.53 (t, J = 7.5 Hz, 1H), 7.50 – 7.42 (m, 2H). <sup>13</sup>C NMR (150 MHz, CDCl<sub>3</sub>) δ 159.6, 150.9, 147.6, 141.1, 132.9, 130.0, 129.1, 128.0, 127.0, 124.8, 124.5, 124.0, 122.9, 119.9, 115.1, 112.7, 111.0, 110.7, 110.6. HRMS-ESI (m/z) [M+H]<sup>+</sup>calcd. For C<sub>21</sub>H<sub>13</sub>N<sub>2</sub>O: 309.1023; Found: 309.1018.

### 7-methoxybenzofuro[3'',2'':3',4']naphtho[1',2':4,5]imidazo[1,2-a]pyridine (3b):

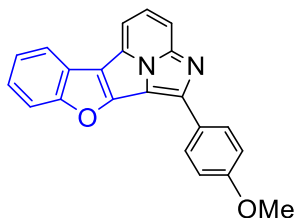

(Eluent: 20% EtOAc/hexane); 60% yield (40.5 mg); yellow solid, Mp: 255-257 °C; <sup>1</sup>H NMR (600 MHz, CDCl<sub>3</sub>) δ 8.53 (d, J = 9.2 Hz, 2H), 8.01 (d, J = 5.8 Hz, 4H), 7.79 (d, J = 7.9 Hz, 1H), 7.51 – 7.42 (m, 2H), 7.18 (d, J = 8.1 Hz, 2H), 3.95 (s, 3H). <sup>13</sup>C NMR (150 MHz, CDCl<sub>3</sub>) δ 161.3, 159.8, 129.7, 126.9, 125.7, 124.7, 124.5, 124.1, 120.0, 114.7, 112.8, 110.5, 110.4, 55.5. HRMS-ESI (m/z) [M+H]<sup>+</sup>calcd. For C<sub>22</sub>H<sub>15</sub>N<sub>2</sub>O<sub>2</sub>: 339.1129; Found: 339.1143.

### 1-(4-ethylphenyl)benzofuro[3,2-a]imidazo[5,1,2-cd]indolizine (3c):

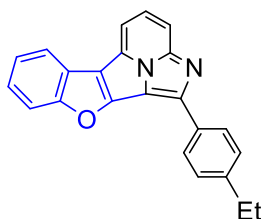

(Eluent: 15% EtOAc/hexane); 73% yield (49.0 mg); yellow solid, Mp: 215-217 °C;  $\delta$   $^1\text{H}$  NMR (600 MHz,  $\text{CDCl}_3$ )  $\delta$  8.48 (d,  $J = 7.9$  Hz, 2H), 8.00 (p,  $J = 7.5, 7.0$  Hz, 4H), 7.77 (d,  $J = 7.9$  Hz, 1H), 7.48 (d,  $J = 7.9$  Hz, 2H), 7.44 (q,  $J = 7.3$  Hz, 2H), 2.80 (q,  $J = 7.9$  Hz, 2H), 1.37 (s, 3H).  $^{13}\text{C}$  NMR (150 MHz,  $\text{CDCl}_3$ )  $\delta$  159.7, 151.1, 148.1, 146.6, 141.3, 130.4, 128.8, 128.1, 126.9, 124.8, 124.5, 124.1, 123.1, 120.0, 115.0, 112.8, 110.8, 110.6, 110.5, 28.9, 15.4. HRMS-ESI ( $m/z$ )  $[\text{M}+\text{H}]^+$  calcd. For  $\text{C}_{23}\text{H}_{17}\text{N}_2\text{O}$ : 337.1336; Found: 337.1348.

**1-(4-fluorophenyl)benzofuro[3,2-a]imidazo[5,1,2-cd]indolizine (3d):**

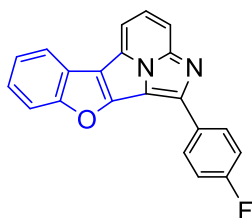

Eluent: 15% EtOAc/hexane); 63% yield (41.0 mg); yellow solid, Mp: 270-272 °C;  $^1\text{H}$  NMR (600 MHz,  $\text{CDCl}_3$ )  $\delta$  8.51 (dd,  $J = 8.6, 5.3$  Hz, 2H), 8.03 – 7.92 (m, 4H), 7.78 – 7.73 (m, 1H), 7.45 (p,  $J = 7.2, 6.6$  Hz, 2H), 7.31 (t,  $J = 8.6$  Hz, 2H).  $^{13}\text{C}$  NMR (150 MHz,  $\text{CDCl}_3$ )  $\delta$  164.7 (d,  $J_{\text{C,F}} = 249$  Hz), 163.0, 159.7, 150.8, 146.6, 141.1, 129.9 (d,  $J_{\text{C,F}} = 7.5$  Hz), 129.3, 127.1, 124.9, 124.6, 124.2, 123.0, 120.0, 116.4 (d,  $J_{\text{C,F}} = 21$  Hz), 115.2, 112.7, 111.1, 110.8, 110.3;  $^{19}\text{F}$  NMR (564 MHz,  $\text{CDCl}_3$ )  $\delta$  -110.21 (s, 1F); HRMS-ESI ( $m/z$ )  $[\text{M}+\text{Na}]^+$  calcd. For  $\text{C}_{21}\text{H}_{11}\text{FN}_2\text{ONa}$ : 349.0748; Found: 349.0738.

**4-(benzofuro[3,2-a]imidazo[5,1,2-cd]indolizin-1-yl)benzonitrile (3e):**

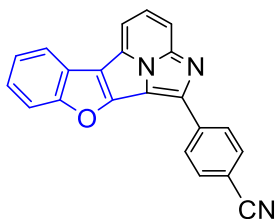

(Eluent: 30% EtOAc/hexane); 65% yield (43.2 mg); yellow solid, Mp: 215-217 °C;  $^1\text{H}$  NMR (600 MHz,  $\text{CDCl}_3$ )  $\delta$  8.61 (d,  $J = 8.0$  Hz, 2H), 8.07 (q,  $J = 5.2, 4.7$  Hz, 3H), 8.01 (d,  $J = 5.8$  Hz, 1H), 7.89 (d,  $J = 8.0$  Hz, 2H), 7.80 (d,  $J = 7.8$  Hz, 1H), 7.52 – 7.46 (m, 2H).  $^{13}\text{C}$  NMR (150 MHz,  $\text{CDCl}_3$ )  $\delta$  159.8, 150.7, 144.7, 141.1, 137.2, 132.9, 128.2, 127.8, 125.4, 125.1, 124.4, 122.8, 120.2, 118.8, 116.1, 112.9, 112.8, 112.2, 111.7. HRMS-ESI ( $m/z$ )  $[\text{M}+\text{H}]^+$  calcd. For  $\text{C}_{22}\text{H}_{12}\text{N}_3\text{O}$ : 334.0975; Found: 334.0983.

**1-(2-fluorophenyl)benzofuro[3,2-a]imidazo[5,1,2-cd]indolizine (3f)**

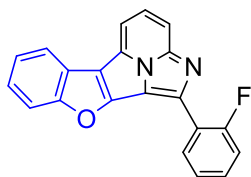

(Eluent: 10% EtOAc/hexane); 65% yield (42.3 mg); yellow solid, Mp:255-257 °C ;  $^1\text{H}$  NMR (600 MHz,  $\text{CDCl}_3$ )  $\delta$  8.68 – 8.62 (m, 1H), 8.08 (d,  $J = 5.5$  Hz, 1H), 8.03 (d,  $J = 3.3$  Hz, 2H), 7.98 (d,  $J = 7.5$  Hz, 1H), 7.78 (d,  $J = 7.5$  Hz, 1H), 7.50 (q,  $J = 7.2, 6.1$  Hz, 1H), 7.45 (dd,  $J = 9.8, 6.4$  Hz, 2H), 7.39 (q,  $J = 9.9, 8.8$  Hz, 2H).;  $^{13}\text{C}$  NMR (150 MHz,  $\text{CDCl}_3$ )  $\delta$  161.8 (d,  $J_{C,F} = 252$  Hz), 159.6, 152.0, 140.4 (d,  $J_{C,F} = 25.5$  Hz), 131.4, 131.3, 130.1, 127.2, 125.1, 124.8, 124.7, 124.6, 124.0, 122.7, 121.4, 121.4, 121.4, 119.9, 116.3 (d,  $J_{C,F} = 21$  Hz), 115.7, 112.9, 111.3, 110.6;  $^{19}\text{F}$  NMR (564 MHz,  $\text{CDCl}_3$ )  $\delta$  -113.28 (s, 1F); HRMS-ESI (m/z)  $[\text{M}+\text{H}]^+$  calcd. For  $\text{C}_{21}\text{H}_{12}\text{FN}_2\text{O}$ : 327.0929; Found: 327.0950.

**4-methyl-1-phenylbenzofuro[3,2-a]imidazo[5,1,2-cd]indolizine (3g) :**

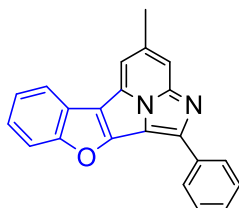

(Eluent: 15% EtOAc/hexane); 69% yield (44.4 mg); yellow solid, Mp:215-217 °C;  $^1\text{H}$  NMR (600 MHz,  $\text{CDCl}_3$ )  $\delta$  8.55 (dd,  $J = 7.8, 1.4$  Hz, 2H), 7.97 (dd,  $J = 7.3, 1.9$  Hz, 1H), 7.84 (d,  $J = 16.3$  Hz, 2H), 7.81 – 7.76 (m, 1H), 7.64 (t,  $J = 7.7$  Hz, 2H), 7.54 – 7.49 (m, 1H), 7.49 – 7.41 (m, 2H), 2.87 (s, 3H).  $^{13}\text{C}$  NMR (150 MHz,  $\text{CDCl}_3$ )  $\delta$  159.7, 151.3, 147.5, 141.2, 138.7, 133.1, 129.8, 129.2, 128.0, 124.4, 124.1, 123.2, 119.9, 114.6, 112.8, 112.2, 111.4, 110.4, 23.0. HRMS-ESI (m/z)  $[\text{M}+\text{Na}]^+$  calcd. For  $\text{C}_{22}\text{H}_{14}\text{N}_2\text{NaO}$ : 345.0999; Found: 345.0978.

**1-(4-ethylphenyl)-4-methylbenzofuro[3,2-a]imidazo[5,1,2-cd]indolizine (3h) :**

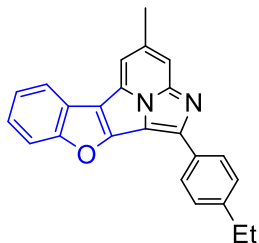

(Eluent: 10% EtOAc/hexane); 73% yield (51.1 mg); yellow solid, Mp:210-212 °C ;  $^1\text{H}$  NMR (600 MHz,  $\text{CDCl}_3$ )  $\delta$  8.46 (d,  $J = 7.9$  Hz, 2H), 7.96 (d,  $J = 7.6$  Hz, 1H), 7.83 (s, 1H), 7.80 (s, 1H), 7.77 (d,  $J = 7.4$  Hz, 1H), 7.47 (d,  $J = 7.8$  Hz, 2H), 7.46 – 7.39 (m, 2H), 2.85 (s, 3H), 2.79 (q,  $J = 7.4$  Hz, 2H), 1.35 (t,  $J = 7.5$  Hz, 3H).  $^{13}\text{C}$  NMR (150 MHz,  $\text{CDCl}_3$ )  $\delta$  159.6, 151.2, 147.8, 146.4, 141.2, 138.5, 130.5, 128.7, 128.0, 124.2, 124.2, 124.0, 123.1, 119.8, 114.3, 112.7, 111.9, 111.1, 110.1, 28.9, 23.0, 15.4. Anal. calcd for  $\text{C}_{24}\text{H}_{18}\text{N}_2\text{O}$ : C, 82.26; H, 5.18; N, 7.99; found: C, 95.88; H, 14.29; N, 4.97.

### 5-methyl-1-phenylbenzofuro[3,2-a]imidazo[5,1,2-cd]indolizine (3i)

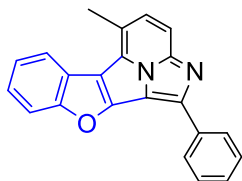

(Eluent: 15% EtOAc/hexane); 67% yield (43.1 mg); yellow solid, Mp:210-212 °C;  $^1\text{H}$  NMR (600 MHz,  $\text{CDCl}_3$ )  $\delta$  8.55 (d,  $J = 7.2$  Hz, 2H), 7.97 (d,  $J = 7.8$  Hz, 1H), 7.86 (s, 1H), 7.83 (s, 1H), 7.78 (d,  $J = 7.8$  Hz, 1H), 7.64 (t,  $J = 7.5$  Hz, 2H), 7.51 (t,  $J = 7.4$  Hz, 1H), 7.48 – 7.41 (m, 2H), 2.87 (s, 3H).  $^{13}\text{C}$  NMR (150 MHz,  $\text{CDCl}_3$ )  $\delta$  159.7, 151.4, 147.6, 141.2, 138.6, 133.1, 129.8, 129.2, 128.0, 124.4, 124.1, 123.2, 119.9, 114.6, 112.8, 112.2, 111.4, 110.4, 23.0. HRMS-ESI ( $m/z$ )  $[\text{M}+\text{Na}]^+$  calcd. For  $\text{C}_{22}\text{H}_{14}\text{N}_2\text{ONa}$ : 345.0989; Found: 345.0999.

### 1-(4-methoxyphenyl)-5-methylbenzofuro[3,2-a]imidazo[5,1,2-cd]indolizine (3j)

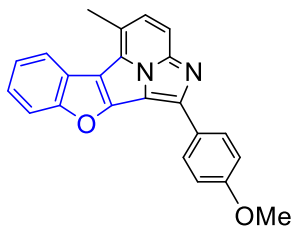

(Eluent:30% EtOAc/hexane); 69% yield (48.5 mg); yellow solid, Mp: 270-272 °C; <sup>1</sup>H NMR (600 MHz, CDCl<sub>3</sub>) δ 8.41 (d, J = 8.5 Hz, 2H), 7.93 – 7.88 (m, 1H), 7.80 (d, J = 8.0 Hz, 1H), 7.71 – 7.64 (m, 2H), 7.41 – 7.34 (m, 2H), 7.13 (d, J = 8.1 Hz, 2H), 3.94 (s, 3H), 3.00 (s, 3H). <sup>13</sup>C NMR (150 MHz, CDCl<sub>3</sub>) δ 161.0, 159.6, 149.9, 147.1, 139.9, 129.3, 128.8, 125.9, 124.2, 124.0, 123.8, 123.0, 121.3, 120.0, 114.7, 114.5, 112.6, 110.3, 109.8, 55.4, 18.6. HRMS-ESI (m/z) [M+H]<sup>+</sup>calcd. For C<sub>23</sub>H<sub>17</sub>N<sub>2</sub>O<sub>2</sub>: 353.1285; Found: 353.1282.

**1-(4-chlorophenyl)-5-methylbenzofuro[3,2-a]imidazo[5,1,2-cd]indolizine (3k)**

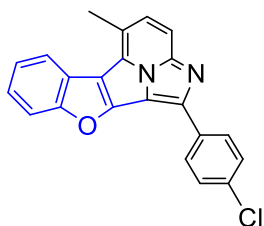

(Eluent: 10% EtOAc/hexane); 61% yield (43.4 mg); yellow solid, Mp: 200-202 °C, <sup>1</sup>H NMR (600 MHz, CDCl<sub>3</sub>) δ 8.39 (d, J = 8.0 Hz, 2H), 8.00 – 7.93 (m, 1H), 7.87 (d, J = 8.2 Hz, 1H), 7.74 (dd, J = 8.7, 4.0 Hz, 2H), 7.57 (d, J = 8.0 Hz, 2H), 7.47 – 7.41 (m, 2H), 3.06 (s, 3H). <sup>13</sup>C NMR (150 MHz, CDCl<sub>3</sub>) δ 159.7, 149.9, 145.5, 139.7, 135.5, 131.7, 129.3, 128.9, 124.6, 124.4, 124.1, 122.9, 122.1, 120.1, 115.3, 112.8, 111.2, 110.4, 18.7. HRMS-ESI (m/z) [M+H]<sup>+</sup>calcd. For C<sub>22</sub>H<sub>14</sub>ClN<sub>2</sub>O: 357.0790; Found: 357.0795.

**1-(4-ethylphenyl)-3-methylbenzofuro[3,2-a]imidazo[5,1,2-cd]indolizine (3l) :**

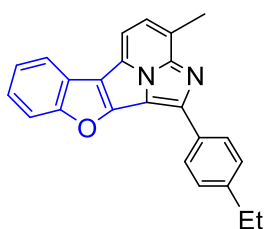

(Eluent: 10% EtOAc/hexane); 67% yield (46.9 mg); yellow solid, Mp: 230-237 °C; <sup>1</sup>H NMR (600 MHz, CDCl<sub>3</sub>) δ 8.50 (d, J = 7.9 Hz, 2H), 7.98 (d, J = 6.8 Hz, 1H), 7.91 (d, J = 7.6 Hz, 1H), 7.78 (t, J = 6.9 Hz, 2H), 7.53 – 7.40 (m, 4H), 3.03 (s, 3H), 2.79 (d, J = 7.6 Hz, 2H), 1.35 (t, J = 7.5 Hz, 3H). <sup>13</sup>C NMR (150 MHz, CDCl<sub>3</sub>) δ 159.7, 146.8, 146.2, 141.0, 130.7, 128.7, 128.0, 127.6, 124.3, 123.9, 123.3, 123.1, 122.2, 119.9, 114.9, 112.7, 110.7, 28.9, 16.2, 15.4. Anal. calcd for C<sub>14</sub>H<sub>18</sub>N<sub>2</sub>O: C, 82.26; H, 5.18; N, 7.99; found: C, 63.40; H, 7.547; N, 7.73.

**4-(3-methylbenzofuro[3,2-a]imidazo[5,1,2-cd]indolizin-1-yl)benzotrile (3m) :**

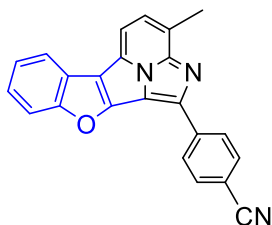

(Eluent: 10% EtOAc/hexane); 66% yield (45.8 mg); yellow solid, Mp: 210-212 °C;  $^1\text{H}$  NMR (600 MHz,  $\text{CDCl}_3$ )  $\delta$  8.58 (d,  $J = 8.4$  Hz, 2H), 8.00 – 7.96 (m, 1H), 7.93 (d,  $J = 7.5$  Hz, 1H), 7.86 (d,  $J = 8.1$  Hz, 2H), 7.82 – 7.75 (m, 2H), 7.47 (dt,  $J = 6.2, 2.8$  Hz, 2H), 3.00 (s, 3H).  $^{13}\text{C}$  NMR (150 MHz,  $\text{CDCl}_3$ )  $\delta$  159.7, 150.1, 143.3, 140.8, 137.5, 132.8, 128.2, 128.1, 124.9, 124.2, 123.8, 123.5, 122.9, 120.1, 118.9, 116.0, 112.8, 112.4, 111.9, 111.8, 16.2. HRMS-ESI (m/z)  $[\text{M}+\text{H}+\text{Na}]^+$  calcd. For  $\text{C}_{23}\text{H}_{14}\text{N}_3\text{NaO}$ : 371.1030; Found: 371.1046.

**1-(2-fluorophenyl)-3-methylbenzofuro[3,2-a]imidazo[5,1,2-cd]indolizine (3n) :**

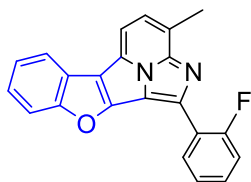

(Eluent: 20% EtOAc/hexane); 63% yield (42.8 mg); yellow solid, Mp: 218-220 °C;  $^1\text{H}$  NMR (600 MHz,  $\text{CDCl}_3$ )  $\delta$  8.69 – 8.64 (m, 1H), 7.98 – 7.92 (m, 1H), 7.88 (d,  $J = 7.9$  Hz, 1H), 7.76 (d,  $J = 7.6$  Hz, 2H), 7.51 – 7.45 (m, 1H), 7.45 – 7.33 (m, 4H), 3.02 (s, 3H).  $^{13}\text{C}$  NMR (150 MHz,  $\text{CDCl}_3$ )  $\delta$  161.6 (d,  $J_{\text{C,F}} = 252$  Hz), 159.5, 151.5, 140.1, 138.9, 131.0 (d,  $J_{\text{C,F}} = 9.0$  Hz), 130.2, 127.6, 124.7, 124.4, 123.8, 123.3, 122.9, 122.6, 121.7, 121.6, 119.8, 116.0 (d,  $J_{\text{C,F}} = 22.5$  Hz), 115.6, 112.8, 110.7, 16.2;  $^{19}\text{F}$  NMR (564 MHz,  $\text{CDCl}_3$ )  $\delta$  -112.56 (s, 1F); HRMS-ESI (m/z)  $[\text{M}+\text{H}]^+$  calcd. For  $\text{C}_{22}\text{H}_{14}\text{FN}_2\text{O}$ : 341.1085. Found: 341.1085.

**5-chloro-1-phenylbenzofuro[3,2-a]imidazo[5,1,2-cd]indolizine (3o):**

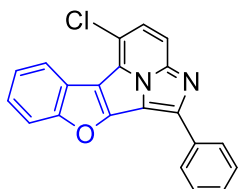



(Eluent: 15% EtOAc/hexane); 77% yield (52.6 mg); yellow solid; Mp: 255-257 °C;  $^1\text{H}$  NMR (600 MHz,  $\text{CDCl}_3$ )  $\delta$  8.52 – 8.48 (m, 2H), 8.00 (s, 2H), 7.95 – 7.90 (m, 1H), 7.79 – 7.74 (m, 1H), 7.67 – 7.61 (m, 2H), 7.56 – 7.51 (m, 1H), 7.49 – 7.42 (m, 2H).;  $^{13}\text{C}$  NMR (150 MHz,  $\text{CDCl}_3$ )  $\delta$  159.8, 151.7, 149.2, 140.8, 133.6, 132.4, 130.4, 129.2, 128.1, 125.0, 124.4, 124.3, 122.6, 120.0, 115.1, 112.9, 111.6, 111.2, 110.8. Anal. calcd for  $\text{C}_{21}\text{H}_{11}\text{ClN}_2\text{O}$ : C, 73.58; H, 3.23; N, 8.17; found: C, 62.72; H, 9.362; N, 8.01.

**4-chloro-1-phenylbenzofuro[3,2-a]imidazo[5,1,2-cd]indolizine (3p) :**

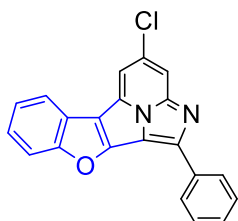

(Eluent: 10% EtOAc/hexane); 79% yield (54.0 mg); yellow solid, Mp: 270-272 °C;  $^1\text{H}$  NMR (600 MHz,  $\text{CDCl}_3$ )  $\delta$  8.48 (d,  $J = 7.1$  Hz, 2H), 8.14 – 8.09 (m, 1H), 7.88 (s, 2H), 7.72 (dd,  $J = 6.1, 3.0$  Hz, 1H), 7.63 (t,  $J = 8.0$  Hz, 2H), 7.55 – 7.50 (m, 1H), 7.42 (h,  $J = 3.4$  Hz, 2H).;  $^{13}\text{C}$  NMR (150 MHz,  $\text{CDCl}_3$ )  $\delta$  159.8, 150.4, 148.8, 139.8, 132.5, 130.3, 129.2, 128.0, 127.6, 125.1, 124.2, 122.9, 122.3, 121.1, 118.0, 115.0, 112.6, 111.2. Anal. calcd for  $\text{C}_{21}\text{H}_{11}\text{ClN}_2\text{O}$ : C, 73.58; H, 3.23; N, 8.17; found: C, 61.02; H, 9.340; N, 7.56.

**8-methoxy-1-phenylbenzofuro[3,2-a]imidazo[5,1,2-cd]indolizine (3q) :**

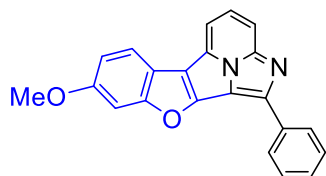

(Eluent: 30% EtOAc/hexane); 72% yield (48.6 mg); yellow solid; Mp: 235-237 °C;  $^1\text{H}$  NMR (600 MHz,  $\text{CDCl}_3$ )  $\delta$  8.52 (d,  $J = 7.8$  Hz, 2H), 7.99 (d,  $J = 7.9$  Hz, 1H), 7.97 – 7.89 (m, 2H), 7.76 (d,  $J = 8.1$  Hz, 1H), 7.62 (t,  $J = 7.4$  Hz, 2H), 7.50 (t,  $J = 7.5$  Hz, 1H), 7.28 (s, 1H), 7.01 (d,  $J = 8.3$  Hz, 1H), 3.92 (s, 3H).  $^{13}\text{C}$  NMR (150 MHz,  $\text{CDCl}_3$ )  $\delta$  160.8, 157.9, 150.6, 147.2, 141.0, 133.1, 129.8, 129.1, 127.9, 126.7, 124.7, 119.9, 116.2, 115.2, 112.1, 111.0, 110.8, 110.7, 98.0, 77.2, 77.0, 76.8, 55.8. HRMS-ESI ( $m/z$ ) [ $\text{M}+\text{H}$ ] $^+$  calcd. For  $\text{C}_{22}\text{H}_{15}\text{N}_2\text{O}_2$ : 339.1129; Found: 339.1123.

**8-methoxy-1-(4-methoxyphenyl)benzofuro[3,2-a]imidazo[5,1,2-cd]indolizine (3r) :**

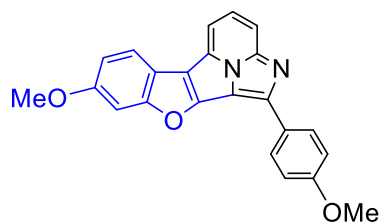

(Eluent: 40% EtOAc/hexane); 73% yield (53.7 mg); yellow liquid, Mp: 230-232 °C;  $^1\text{H}$  NMR (600 MHz,  $\text{CDCl}_3$ )  $\delta$  8.52 – 8.47 (m, 2H), 7.97 (d,  $J$  = 3.3 Hz, 3H), 7.84 (d,  $J$  = 8.3 Hz, 1H), 7.34 (d,  $J$  = 2.3 Hz, 1H), 7.16 (d,  $J$  = 8.6 Hz, 2H), 7.07 (dd,  $J$  = 8.4, 2.2 Hz, 1H), 3.95 (d,  $J$  = 2.3 Hz, 6H).  $^{13}\text{C}$  NMR (150 MHz,  $\text{CDCl}_3$ )  $\delta$  161.1, 160.8, 157.9, 150.6, 147.4, 141.2, 129.5, 126.6, 125.8, 124.5, 120.0, 116.4, 114.9, 114.6, 112.0, 110.4, 110.3, 110.2, 98.1, 55.9, 55.4. HRMS-ESI ( $m/z$ )  $[\text{M}+\text{H}]^+$  calcd. For  $\text{C}_{23}\text{H}_{17}\text{N}_2\text{O}_3$ : 369.1234; Found: 369.1239.

**1-(4-fluorophenyl)-8-methoxybenzofuro[3,2-a]imidazo[5,1,2-cd]indolizine (3s) :**

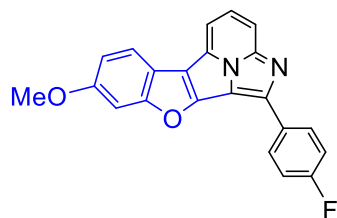

(Eluent: 20% EtOAc/hexane); 73% yield (51.9 mg); yellow solid, Mp: 234-237 °C;  $^1\text{H}$  NMR (600 MHz,  $\text{CDCl}_3$ )  $\delta$  8.48 – 8.43 (m, 2H), 7.98 – 7.87 (m, 3H), 7.75 (d,  $J$  = 8.2 Hz, 1H), 7.30 – 7.25 (m, 3H), 7.02 (dd,  $J$  = 8.2, 2.3 Hz, 1H), 3.93 (s, 3H).  $^{13}\text{C}$  NMR (150 MHz,  $\text{CDCl}_3$ )  $\delta$  164.6 (d,  $J_{\text{C,F}}$  = 249 Hz), 160.7, 158.0, 150.3, 146.0, 141.0, 129.8 (d,  $J_{\text{C,F}}$  = 9.0 Hz), 129.3, 126.8, 124.6, 120.0, 116.3 (d,  $J_{\text{C,F}}$  = 22.5 Hz), 115.2, 112.1, 110.9, 110.7, 110.4, 98.0, 55.8;  $^{19}\text{F}$  NMR (564 MHz,  $\text{CDCl}_3$ )  $\delta$  -110.47 (s, 1F); HRMS-ESI ( $m/z$ )  $[\text{M}+\text{H}]^+$  calcd. For  $\text{C}_{22}\text{H}_{14}\text{FN}_2\text{O}_2$ : 357.1034; Found: 357.1025.

**. 1-(2-fluorophenyl)-8-methoxybenzofuro[3,2-a]imidazo[5,1,2-cd]indolizine (3t) :**

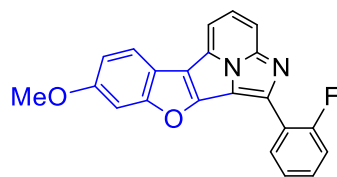

(Eluent: 30% EtOAc/hexane); 64% yield (45.5 mg); yellow solid, Mp: 225-227 °C; <sup>1</sup>H NMR (600 MHz, CDCl<sub>3</sub>) δ 8.62 (t, J = 7.6 Hz, 1H), 8.02 (d, J = 8.0 Hz, 1H), 7.99 – 7.91 (m, 2H), 7.77 (d, J = 8.4 Hz, 1H), 7.52 – 7.44 (m, 1H), 7.40 – 7.33 (m, 2H), 7.29 (s, 1H), 7.04 – 6.99 (m, 1H), 3.91 (s, 3H). <sup>13</sup>C NMR (150 MHz, CDCl<sub>3</sub>) δ 161.6 (d, J<sub>C,F</sub> = 250 Hz), 159.9, 158.0, 151.4, 140.2, 139.7, 131.2, 131.1, 130.0, 126.8, 124.8 (d, J<sub>C,F</sub> = 21.0 Hz), 121.5, 121.4, 119.9, 116.1, 115.9 (d, J<sub>C,F</sub> = 7.5 Hz), 115.7, 112.2, 111.1, 110.5, 97.9, 55.8; <sup>19</sup>F NMR (564 MHz, CDCl<sub>3</sub>) δ -113.43 (s, 1F); HRMS-ESI (m/z) [M+Na]<sup>+</sup>calcd. For C<sub>22</sub>H<sub>13</sub>FN<sub>2</sub>O<sub>2</sub>Na: 379.0854; Found: 379.0845.

### 8-methoxy-5-methyl-1-phenylbenzofuro[3,2-a]imidazo[5,1,2-cd]indolizine (3u)

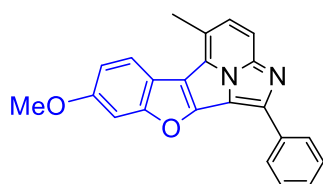

(Eluent: 30% EtOAc/hexane); 72% yield (50.6 mg); yellow solid, Mp:257-258 °C; <sup>1</sup>H NMR (600 MHz, CDCl<sub>3</sub>) δ 8.54 – 8.49 (m, 2H), 7.81 – 7.76 (m, 3H), 7.62 (t, J = 7.7 Hz, 2H), 7.49 (t, J = 7.2 Hz, 1H), 7.32 (d, J = 2.3 Hz, 1H), 7.05 (dd, J = 8.1, 2.3 Hz, 1H), 3.94 (s, 3H), 2.84 (s, 3H). <sup>13</sup>C NMR (150 MHz, CDCl<sub>3</sub>) δ 160.7, 157.9, 150.9, 147.0, 141.0, 138.3, 133.2, 129.7, 129.1, 127.9, 124.2, 119.9, 116.4, 114.6, 112.2, 112.1, 111.3, 110.5, 98.1, 55.9, 23.0. HRMS-ESI (m/z) [M+Na]<sup>+</sup>calcd. For C<sub>23</sub>H<sub>16</sub>N<sub>2</sub>NaO<sub>2</sub>: 375.1104; Found: 375.1098.

### 5,7-dimethyl-1-phenylbenzofuro[3,2-a]imidazo[5,1,2-cd]indolizine (3v):

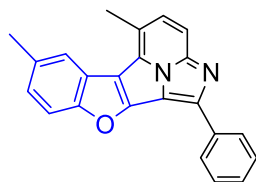

(Eluent: 20% EtOAc/hexane); 70% yield (47.0 mg); yellow solid; Mp:227-228 °C; <sup>1</sup>H NMR (600 MHz, CDCl<sub>3</sub>) δ 8.49 (d, J = 7.4 Hz, 2H), 7.76 (d, J = 12.3 Hz, 2H), 7.68 (s, 1H), 7.64 – 7.57 (m, 3H), 7.50 (t, J = 7.0 Hz, 1H), 7.19 (d, J = 8.3 Hz, 1H), 2.82 (s, 3H), 2.54 (s, 3H). <sup>13</sup>C NMR (150 MHz, CDCl<sub>3</sub>) δ 158.0, 151.4, 147.2, 141.0, 138.5, 133.7, 133.1, 129.7, 129.1, 127.9, 125.4, 124.3, 123.0, 119.9, 114.4, 112.1, 112.0, 111.2, 110.4, 23.0, 21.5. Anal. calcd for C<sub>23</sub>H<sub>16</sub>N<sub>2</sub>O: C, 82.12; H, 4.79; N, 8.33; found: C, 64.36; H, 4.83 N, 7.83.

**1-(4-methoxyphenyl)-5,7-dimethylbenzofuro[3,2-a]imidazo[5,1,2-cd]indolizine (3w):**

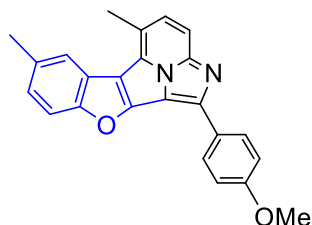

(Eluent: 25% EtOAc/hexane); 69% yield (50.5 mg); yellow solid, Mp:207-209 °C; <sup>1</sup>H NMR (600 MHz, CDCl<sub>3</sub>) δ 8.49 (d, J = 8.0 Hz, 2H), 7.87 (d, J = 8.1 Hz, 1H), 7.80 – 7.73 (m, 2H), 7.64 (d, J = 8.1 Hz, 1H), 7.23 (d, J = 8.7 Hz, 1H), 7.16 (d, J = 8.4 Hz, 2H), 3.94 (s, 3H), 3.11 (s, 3H), 2.57 (s, 3H). <sup>13</sup>C NMR (150 MHz, CDCl<sub>3</sub>) δ 161.0, 158.2, 158.2, 150.4, 150.4, 147.1, 140.0, 133.6, 129.4, 128.9, 125.9, 125.4, 124.3, 123.1, 121.4, 120.2, 114.6, 112.2, 110.3, 55.4, 21.6, 18.8. Anal. calcd for C<sub>24</sub>H<sub>18</sub>N<sub>2</sub>O<sub>2</sub>: C, 78.67; H, 4.95; N, 7.65; found: C, 73.84; H, 6.43; N, 14.23.

**1-(4-chlorophenyl)-5,7-dimethylbenzofuro[3,2-a]imidazo[5,1,2-cd]indolizine (3x)**

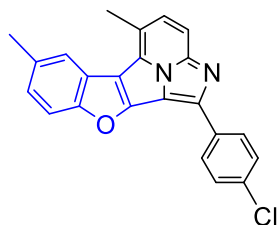

(Eluent: 15% EtOAc/hexane); 70% yield (51.8 mg); yellow solid, Mp: 215-217 °C; <sup>1</sup>H NMR (600 MHz, CDCl<sub>3</sub>) δ 8.34 (d, J = 8.0 Hz, 2H), 7.81 (d, J = 7.9 Hz, 1H), 7.70 – 7.62 (m, 2H), 7.54 (d, J = 7.9 Hz, 3H), 7.18 (d, J = 8.3 Hz, 1H), 3.00 (s, 3H), 2.53 (s, 3H). <sup>13</sup>C NMR (150 MHz, CDCl<sub>3</sub>) δ 158.0, 150.0, 145.2, 139.6, 135.4, 133.6, 131.7, 129.3, 129.2, 128.9, 125.6, 124.3, 122.7, 121.9, 120.1, 115.1, 112.2, 111.0, 110.4, 21.5, 18.7. HRMS-ESI (m/z) [M+H]<sup>+</sup>calcd. For C<sub>23</sub>H<sub>16</sub>ClN<sub>2</sub>O: 371.0946; Found: 371.0975.

**1-(4-ethylphenyl)-7-methylbenzofuro[3,2-a]imidazo[5,1,2-cd]indolizine (3y) :**

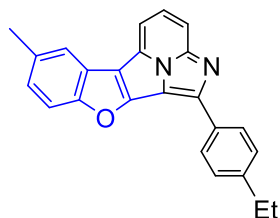

(Eluent: 15% EtOAc/hexane); 79 % yield (55.3 mg); yellow solid, Mp: 215-217 °C;  $^1\text{H}$  NMR (600 MHz,  $\text{CDCl}_3$ )  $\delta$  8.48 (d,  $J = 7.3$  Hz, 2H), 8.04 – 7.96 (m, 3H), 7.78 (s, 1H), 7.64 (d,  $J = 9.0$  Hz, 1H), 7.48 (d,  $J = 7.9$  Hz, 2H), 7.23 (d,  $J = 8.6$  Hz, 1H), 2.79 (d,  $J = 7.9$  Hz, 2H), 2.57 (s, 3H), 1.35 (d,  $J = 16.0$  Hz, 3H).;  $^{13}\text{C}$  NMR (150 MHz,  $\text{CDCl}_3$ )  $\delta$  158.1, 151.3, 147.9, 146.6, 141.2, 133.8, 130.5, 128.7, 128.1, 126.9, 125.5, 124.9, 123.0, 120.1, 115.0, 112.2, 110.7, 110.5, 28.9, 21.5, 15.4. Anal. calcd for  $\text{C}_{24}\text{H}_{18}\text{N}_2\text{O}$ : C, 82.26; H, 5.18; N, 7.99; found: C, 62.93; H, 9.036; N, 7.85.

**1-(4-methoxyphenyl)-7-methylbenzofuro[3,2-a]imidazo[5,1,2-cd]indolizine (3z) :**

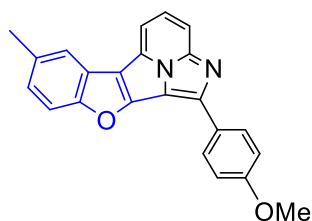

(Eluent: 30% EtOAc/hexane); 67 % yield (47.1 mg); yellow solid, Mp: 218-220 °C;  $^1\text{H}$  NMR (600 MHz,  $\text{CDCl}_3$ )  $\delta$  8.48 (d,  $J = 8.3$  Hz, 2H), 7.98 – 7.91 (m, 3H), 7.73 (s, 1H), 7.61 (d,  $J = 8.0$  Hz, 1H), 7.20 (d,  $J = 8.5$  Hz, 1H), 7.15 (d,  $J = 8.0$  Hz, 2H), 3.94 (s, 3H), 2.55 (s, 3H).;  $^{13}\text{C}$  NMR (150 MHz,  $\text{CDCl}_3$ )  $\delta$  161.2, 158.1, 151.1, 147.8, 141.3, 133.7, 129.6, 126.7, 125.7, 125.4, 124.7, 123.1, 120.0, 114.6, 112.1, 110.3, 110.2, 110.1, 55.4, 21.5. HRMS-ESI (m/z)  $[\text{M}+\text{H}]^+$  calcd. For  $\text{C}_{23}\text{H}_{17}\text{N}_2\text{O}_2$ : 353.1285; Found: 353.1291.

**1-(2-fluorophenyl)-7-methylbenzofuro[3,2-a]imidazo[5,1,2-cd]indolizine (3aa) :**

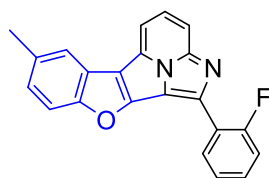

(Eluent: 15% EtOAc/hexane); 60% yield (40.8 mg); yellow solid, Mp: 218-220 °C;  $^1\text{H}$  NMR (600 MHz,  $\text{CDCl}_3$ )  $\delta$  8.61 (t,  $J = 7.4$  Hz, 1H), 8.00 (d,  $J = 8.1$  Hz, 1H), 7.96 (d,  $J = 7.9$  Hz, 1H), 7.91 (d,  $J = 7.7$  Hz, 1H), 7.67 (s, 1H), 7.57 (d,  $J = 8.1$  Hz, 1H), 7.48 (q,  $J = 7.0$  Hz, 1H), 7.40 – 7.32 (m, 2H), 7.17 (d,  $J = 8.2$  Hz, 1H), 2.52 (s, 3H).;  $^{13}\text{C}$  NMR (150 MHz,  $\text{CDCl}_3$ )  $\delta$  161.7 (d,  $J_{\text{C,F}} = 252.0$  Hz), 160.0, 158.0, 152.1, 140.3 (d,  $J_{\text{C,F}} = 43.5$  Hz), 133.5, 131.3 (d,  $J_{\text{C,F}} = 7.5$  Hz), 130.1, 127.0, 125.6, 125.1, 124.7, 124.7, 122.6, 121.5, 121.4, 119.9, 116.1 (d,  $J_{\text{C,F}} = 21.0$  Hz), 115.6, 112.7, 112.6, 112.2, 111.1, 110.3,

21.5;  $^{19}\text{F}$  NMR (564 MHz,  $\text{CDCl}_3$ )  $\delta$  -113.78 (s, 1F); HRMS-ESI (m/z)  $[\text{M}+\text{H}]^+$  calcd. For  $\text{C}_{22}\text{H}_{14}\text{FN}_2\text{O}$ : 341.1085; Found: 341.1090.

**1-(4-fluorophenyl)-7-methylbenzofuro[3,2-a]imidazo[5,1,2-cd]indolizine (3ab)**

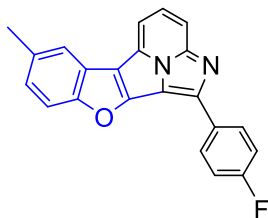

(Eluent: 10% EtOAc/hexane); 68% yield (46.2 mg); yellow solid, Mp: 210-212 °C;  $^1\text{H}$  NMR (600 MHz,  $\text{CDCl}_3$ )  $\delta$  8.53 (dd,  $J = 8.6, 5.2$  Hz, 2H), 8.00 (td,  $J = 5.6, 2.4$  Hz, 3H), 7.78 (s, 1H), 7.64 (d,  $J = 9.1$  Hz, 1H), 7.35 – 7.30 (m, 2H), 7.24 (d,  $J = 8.9$  Hz, 2H), 2.57 (s, 3H).;  $^{13}\text{C}$  NMR (150 MHz,  $\text{CDCl}_3$ )  $\delta$  164.7 (d,  $J_{\text{C,F}} = 249.0$  Hz), 163.0, 158.2, 151.1, 146.4, 141.1, 133.9, 129.9 (d,  $J_{\text{C,F}} = 9.0$  Hz), 129.3, 127.1, 125.7, 125.0, 122.9, 120.2, 116.4 (d,  $J_{\text{C,F}} = 22.5$  Hz), 115.2, 112.2, 111.0, 110.7, 110.5, 21.5;  $^{19}\text{F}$  NMR (564 MHz,  $\text{CDCl}_3$ )  $\delta$  -110.30 (s, 1F); HRMS-ESI (m/z)  $[\text{M}+\text{H}]^+$  calcd. For  $\text{C}_{22}\text{H}_{14}\text{FN}_2\text{O}$ : 341.1085; Found: 341.1086.

**7-methyl-1-phenylbenzofuro[3,2-a]imidazo[5,1,2-cd]indolizine (3ac) :**

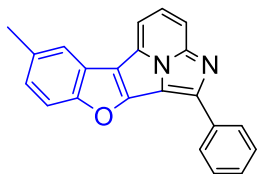

(Eluent: 10% EtOAc/hexane); 68% yield (43.7 mg); yellow solid, Mp: 210-212 °C;  $^1\text{H}$  NMR (600 MHz,  $\text{CDCl}_3$ )  $\delta$  8.69 – 8.64 (m, 1H), 7.98 – 7.92 (m, 1H), 7.88 (d,  $J = 7.9$  Hz, 1H), 7.76 (d,  $J = 7.6$  Hz, 2H), 7.51 – 7.45 (m, 1H), 7.45 – 7.33 (m, 4H), 3.02 (s, 3H).  $^{13}\text{C}$  NMR (150 MHz,  $\text{CDCl}_3$ )  $\delta$  161.6, 159.9, 159.5, 151.5, 140.1, 138.9, 131.0, 131.0, 130.2, 127.6, 124.7, 124.4, 123.8, 123.3, 122.9, 122.6, 121.7, 121.6, 119.8, 116.0, 115.9, 115.6, 112.8, 110.7, 16.2. HRMS-ESI (m/z)  $[\text{M}+\text{H}]^+$  calcd. For  $\text{C}_{22}\text{H}_{15}\text{N}_2\text{O}$ : 323.1179; Found: 323.1177.

**1-(4-ethylphenyl)-4,7-dimethylbenzofuro[3,2-a]imidazo[5,1,2-cd]indolizine (3ad) :**

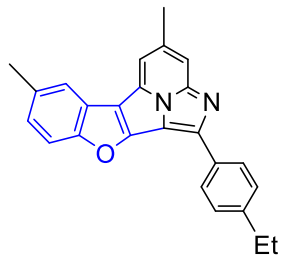

(Eluent: 10% EtOAc/hexane); 73% yield (53.1 mg); yellow solid, Mp: 205-207 °C;  $^1\text{H}$  NMR (600 MHz,  $\text{CDCl}_3$ )  $\delta$  8.45 (d,  $J = 7.4$  Hz, 2H), 7.81 (d,  $J = 12.7$  Hz, 2H), 7.76 (s, 1H), 7.64 (d,  $J = 8.0$  Hz, 1H), 7.47 (d,  $J = 7.7$  Hz, 2H), 7.22 (d,  $J = 8.6$  Hz, 1H), 2.85 (s, 3H), 2.78 (q,  $J = 7.5$  Hz, 2H), 2.57 (s, 3H), 1.34 (d,  $J = 15.9$  Hz, 4H).;  $^{13}\text{C}$  NMR (150 MHz,  $\text{CDCl}_3$ )  $\delta$  158.1, 151.6, 147.6, 146.4, 141.2, 138.5, 133.7, 130.6, 128.7, 128.0, 125.3, 124.4, 123.2, 120.0, 114.3, 112.2, 111.9, 111.0, 28.9, 23.0, 21.5, 15.4. HRMS-ESI ( $m/z$ )  $[\text{M}+\text{H}]^+$  calcd. For  $\text{C}_{25}\text{H}_{21}\text{N}_2\text{O}$ : 365.1649; Found: 365.1648.

**4-(3,7-dimethylbenzofuro[3,2-a]imidazo[5,1,2-cd]indolizin-1-yl)benzonitrile (3ae) :**

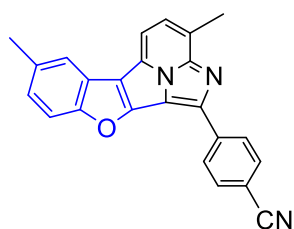

(Eluent: 25% (EtOAc/hexane)); 68% yield (49.0 mg) yellow solid, Mp: 230-232 °C;  $^1\text{H}$  NMR (600 MHz,  $\text{CDCl}_3$ )  $\delta$  8.57 (d,  $J = 8.5$  Hz, 2H), 7.89 (d,  $J = 7.5$  Hz, 1H), 7.85 (d,  $J = 8.1$  Hz, 2H), 7.77 (d,  $J = 7.5$  Hz, 1H), 7.75 (d,  $J = 1.7$  Hz, 1H), 7.62 (d,  $J = 8.3$  Hz, 1H), 7.26 – 7.23 (m, 1H), 2.99 (s, 3H), 2.57 (s, 3H).;  $^{13}\text{C}$  NMR (150 MHz,  $\text{CDCl}_3$ )  $\delta$  158.1, 150.3, 143.2, 140.7, 137.6, 133.9, 132.8, 128.1, 128.1, 125.9, 123.7, 123.6, 122.8, 120.2, 119.0, 115.9, 112.3, 112.3, 112.0, 111.6, 21.5, 16.2. Anal. calcd for  $\text{C}_{24}\text{H}_{15}\text{N}_3\text{O}$ : C, 79.76; H, 4.18; N, 11.63; found: C, 57.78; H, 9.463; N, 8.83.

**10-methoxy-1-phenylfuro[3',2':5,6]benzofuro[3,2-a]imidazo[5,1,2-cd]indolizine (3af) :**

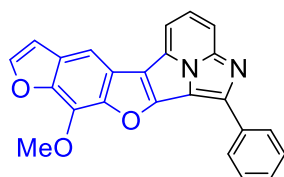

(Eluent: 15% (EtOAc/hexane); 60% yield (45.3 mg); yellow solid, Mp: 290-292 °C;  $^1\text{H}$  NMR (600 MHz,  $\text{CDCl}_3$ )  $\delta$  8.58 (d,  $J = 7.5$  Hz, 2H), 8.03 (dt,  $J = 9.7, 7.8$  Hz, 3H), 7.74 (d,  $J = 2.7$  Hz, 2H), 7.65 (t,  $J = 7.5$  Hz, 2H), 7.53 (d,  $J = 7.3$  Hz, 1H), 6.93 (d,  $J = 2.2$  Hz, 1H), 4.57 (s, 3H).  $^{13}\text{C}$  NMR (150 MHz,  $\text{CDCl}_3$ )  $\delta$  151.5, 148.1, 147.7, 145.9, 143.5, 141.2, 133.0, 131.8, 130.0, 129.2, 128.1, 127.1, 127.0, 125.0, 121.5, 115.2, 111.1, 110.8, 110.7, 106.9, 103.5, 61.2. HRMS-ESI ( $m/z$ )  $[\text{M}+\text{H}]^+$  calcd. For  $\text{C}_{24}\text{H}_{15}\text{N}_2\text{O}_3$ : 379.1078; Found: 379.1078.

**6-methyl-1-phenyl-6H-imidazo[5',1',2':3,4,5]indolizino[1,2-b]indole (5a) :**

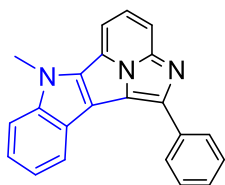

(Eluent: 30% (EtOAc/hexane); 75% yield (48.1 mg); yellow solid, Mp: 270-272 °C;  $^1\text{H}$  NMR (600 MHz,  $\text{CDCl}_3$ )  $\delta$  8.58 – 8.49 (m, 2H), 8.31 (d,  $J = 8.0$  Hz, 1H), 8.06 (d,  $J = 7.9$  Hz, 1H), 7.94 (dd,  $J = 18.3, 7.5$  Hz, 2H), 7.69 (t,  $J = 7.6$  Hz, 2H), 7.53 (dt,  $J = 24.2, 8.3$  Hz, 3H), 7.42 – 7.33 (m, 1H), 4.21 (s, 3H).  $^{13}\text{C}$  NMR (150 MHz,  $\text{CDCl}_3$ )  $\delta$  145.6, 142.7, 139.7, 136.1, 135.0, 129.0, 128.9, 128.5, 124.9, 124.3, 121.5, 121.3, 120.2, 119.6, 117.0, 114.5, 111.6, 110.1, 108.2, 31.9. HRMS-ESI ( $m/z$ )  $[\text{M}+\text{H}]^+$  calcd. For  $\text{C}_{22}\text{H}_{16}\text{N}_3$ : 322.1325; Found: 322.1339.

**1-(4-ethylphenyl)-6-methyl-6H-imidazo[5',1',2':3,4,5]indolizino[1,2-b]indole (5b) :**

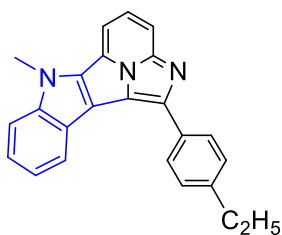

(Eluent: 30% (EtOAc/hexane); 69% yield (48.1 mg); yellow solid, Mp: 200-202 °C;  $^1\text{H}$  NMR (600 MHz,  $\text{CDCl}_3$ )  $\delta$  8.46 (d,  $J = 8.0$  Hz, 2H), 8.35 (d,  $J = 8.0$  Hz, 1H), 8.05 (d,  $J = 8.1$  Hz, 1H), 7.97 (d,  $J = 7.4$  Hz, 1H), 7.58 (d,  $J = 8.4$  Hz, 1H), 7.52 (dd,  $J = 14.1, 7.7$  Hz, 3H), 7.38 (t,  $J = 7.5$  Hz, 1H), 4.24 (s, 3H), 2.83 (q,  $J = 7.7$  Hz, 2H), 1.38 (t,  $J = 7.6$  Hz, 3H).  $^{13}\text{C}$  NMR (150 MHz,  $\text{CDCl}_3$ )  $\delta$  145.7, 145.3, 142.6, 139.6, 135.9, 132.3, 128.5, 128.4, 124.6, 124.1, 121.4, 120.9, 120.0, 119.5, 116.6, 114.4, 111.2,



110.0, 107.9, 31.7, 28.9, 15.5. Anal. calcd for C<sub>24</sub>H<sub>19</sub>N<sub>3</sub>: C, 82.49; H, 5.48; N, 12.03; found: C, 94.97; H, 8.786; N, 12.43.

**1-(4-fluorophenyl)-6-methyl-6H-imidazo[5',1',2':3,4,5]indolizino[1,2-b]indole (5c) :**

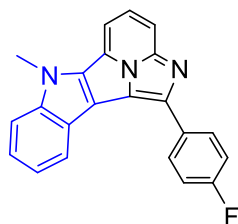

(Eluent: 30 % (EtOAc/hexane); 65% yield (44.0 mg); yellow solid, Mp: 240-242 °C; <sup>1</sup>H NMR (600 MHz, CDCl<sub>3</sub>) δ 8.49 – 8.43 (m, 2H), 8.20 (d, J = 8.0 Hz, 1H), 8.03 (d, J = 7.8 Hz, 1H), 7.95 – 7.87 (m, 2H), 7.55 (d, J = 8.2 Hz, 1H), 7.50 (t, J = 7.6 Hz, 1H), 7.40 – 7.33 (m, 3H), 4.18 (s, 3H). <sup>13</sup>C NMR (150 MHz, CDCl<sub>3</sub>) δ 164.2 (d, J<sub>C,F</sub> = 247.5 Hz), 162.6, 144.4, 142.7, 139.6, 136.1, 131.2, 130.2 (d, J<sub>C,F</sub> = 9.0 Hz), 125.0, 124.3, 121.2, 120.2, 119.5, 116.6, 116.3 (d, J<sub>C,F</sub> = 22.5 Hz), 114.3, 111.5, 110.2, 108.2, 31.9; <sup>19</sup>F NMR (564 MHz, CDCl<sub>3</sub>) δ -112.23 (s, 1F); Anal. calcd for C<sub>22</sub>H<sub>14</sub>FN<sub>3</sub>: C, 77.86; H, 4.16; N, 12.38; found: C, 61.61; H, 13.344; N, 7.91.

**4-(6-methyl-6H-imidazo[5',1',2':3,4,5]indolizino[1,2-b]indol-1-yl)benzotrile (5d) :**

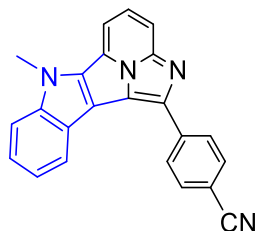

(Eluent: 30 % (EtOAc/hexane); 64% yield (44.2 mg); yellow solid, Mp: 230-232 °C; <sup>1</sup>H NMR (600 MHz, CDCl<sub>3</sub>) δ 8.59 – 8.55 (m, 2H), 8.17 (d, J = 7.9 Hz, 1H), 8.07 (d, J = 7.8 Hz, 1H), 8.00 – 7.90 (m, 4H), 7.58 (d, J = 8.2 Hz, 1H), 7.53 (t, J = 7.6 Hz, 1H), 7.40 (t, J = 7.4 Hz, 1H), 4.22 (s, 3H). <sup>13</sup>C NMR (150 MHz, CDCl<sub>3</sub>) δ 142.7, 142.3, 139.6, 139.3, 136.6, 132.7, 128.6, 125.9, 124.6, 121.8, 121.0, 120.6, 119.4, 119.0, 117.8, 112.5, 111.8, 110.4, 108.9, 32.0. Anal. calcd for C<sub>23</sub>H<sub>14</sub>N<sub>4</sub>: C, 79.75; H, 4.07; N, 16.17; found: C, 87.72; H, 6.830; N, 13.33.

**5-chloro-6-methyl-1-phenyl-6H-imidazo[5',1',2':3,4,5]indolizino[1,2-b]indole (5e) :**

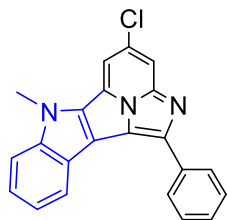

(Eluent: 30% (EtOAc/hexane); 63% yield (44.7 mg); yellow solid, Mp: 230-232 °C;  $^1\text{H}$  NMR (600 MHz,  $\text{CDCl}_3$ )  $\delta$  8.50 – 8.46 (m, 2H), 8.27 (d,  $J = 7.9$  Hz, 1H), 8.01 (s, 1H), 7.93 (s, 1H), 7.69 (t,  $J = 7.7$  Hz, 2H), 7.58 – 7.49 (m, 3H), 7.40 – 7.35 (m, 1H), 4.17 (s, 3H).  $^{13}\text{C}$  NMR (150 MHz,  $\text{CDCl}_3$ )  $\delta$  146.9, 142.9, 139.2, 135.4, 134.4, 131.2, 129.3, 129.1, 128.4, 124.9, 121.6, 120.6, 120.5, 119.4, 117.1, 115.6, 111.3, 110.2, 108.9, 31.9. Anal. calcd for  $\text{C}_{22}\text{H}_{14}\text{ClN}_3$ : C, 74.26; H, 3.97; N, 11.81; found: C, 63.32; H, 10.245; N, 7.94.

**9-methoxy-6-methyl-1-phenyl-6H-imidazo[5',1',2':3,4,5]indolizino[1,2-b]indole (5f) :**

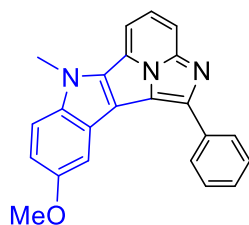

(Eluent: 30% (EtOAc/hexane); 75% yield (52.6 mg); yellow solid, Mp: 220-222 °C;  $^1\text{H}$  NMR (600 MHz,  $\text{CDCl}_3$ )  $\delta$  8.47 – 8.36 (m, 2H), 7.96 (d,  $J = 8.0$  Hz, 1H), 7.81 (td,  $J = 7.7, 1.5$  Hz, 1H), 7.77 (dd,  $J = 7.5, 2.1$  Hz, 1H), 7.66 – 7.59 (m, 3H), 7.54 – 7.48 (m, 1H), 7.32 (dd,  $J = 9.0, 1.9$  Hz, 1H), 7.08 (dt,  $J = 8.9, 1.7$  Hz, 1H), 4.01 (d,  $J = 2.4$  Hz, 3H), 3.93 (s, 3H).  $^{13}\text{C}$  NMR (150 MHz,  $\text{CDCl}_3$ )  $\delta$  154.1, 144.7, 139.5, 137.8, 136.3, 135.0, 128.8, 128.4, 124.7, 121.2, 119.5, 116.8, 114.3, 113.8, 111.4, 110.8, 107.7, 103.0, 55.6, 31.8. HRMS-ESI ( $m/z$ ) [ $\text{M}+\text{H}$ ] $^+$  calcd. For  $\text{C}_{23}\text{H}_{18}\text{N}_3\text{O}$ : 352.1445; Found: 352.1447.

**1-(4-fluorophenyl)-9-methoxy-6-methyl-6H-imidazo[5',1',2':3,4,5]indolizino[1,2-b]indole (5g) :**

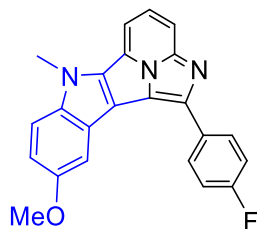

(Eluent: 30% (EtOAc/hexane); 63% yield (46.4 mg); yellow solid, Mp: 260-262 °C;  $^1\text{H}$  NMR (600 MHz,  $\text{CDCl}_3$ )  $\delta$  8.38 (dd,  $J = 8.5, 5.6$  Hz, 2H), 7.96 (d,  $J = 8.0$  Hz, 1H), 7.82 (dt,  $J = 15.2, 7.4$  Hz, 2H), 7.53 (d,  $J = 2.5$  Hz, 1H), 7.36 (d,  $J = 9.0$  Hz, 1H), 7.31 (t,  $J = 8.5$  Hz, 2H), 7.10 (dd,  $J = 8.9, 2.5$  Hz, 1H), 4.05 (s, 3H), 3.93 (s, 3H).  $^{13}\text{C}$  NMR (150 MHz,  $\text{CDCl}_3$ )  $\delta$  164.2 (d,  $J_{\text{C,F}} = 247.5$  Hz), 154.2, 143.7, 139.6, 137.8, 136.5, 131.3, 130.1 (d,  $J_{\text{C,F}} = 7.5$  Hz), 124.9, 121.4, 119.5, 116.6, 116.0 (d,  $J_{\text{C,F}} = 21.0$  Hz), 114.3, 113.8, 111.4, 110.9, 107.9, 103.0, 55.7, 31.9;  $^{19}\text{F}$  NMR (564 MHz,  $\text{CDCl}_3$ )  $\delta$  -112.32 (s, 1F); HRMS-ESI ( $m/z$ )  $[\text{M}+\text{H}]^+$  calcd. For  $\text{C}_{23}\text{H}_{17}\text{FN}_3\text{O}$ : 370.1351; Found: 370.1350.

**6-methyl-1-phenyl-6H-imidazo[5,1,2-cd]pyrido[3',2':4,5]pyrrolo[2,3-a]indolizine (5h) :**

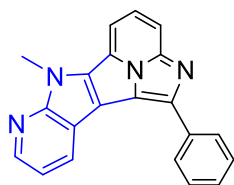

(Eluent: 40% (EtOAc/hexane); 60% yield (38.6 mg); yellow solid, Mp: 200-202 °C;  $^1\text{H}$  NMR (600 MHz,  $\text{CDCl}_3$ )  $\delta$  8.60 – 8.54 (m, 2H), 8.53 – 8.46 (m, 2H), 8.10 (d,  $J = 8.1$  Hz, 1H), 8.04 (d,  $J = 7.5$  Hz, 1H), 7.96 (t,  $J = 7.8$  Hz, 1H), 7.69 (t,  $J = 7.7$  Hz, 2H), 7.58 – 7.51 (m, 1H), 7.33 (dd,  $J = 7.8, 4.8$  Hz, 1H), 4.33 (s, 3H).  $^{13}\text{C}$  NMR (150 MHz,  $\text{CDCl}_3$ )  $\delta$  152.0, 145.9, 144.9, 139.8, 135.0, 134.6, 129.2, 129.1, 128.2, 125.2, 121.1, 117.1, 116.1, 113.1, 112.2, 111.7, 109.1, 30.3. Anal. calcd for  $\text{C}_{21}\text{H}_{14}\text{N}_4$ : C, 78.24; H, 4.38; N, 17.38; found: C, 86.30; H, 8.368; N, 15.67.

**3-(benzofuran-2-yl)imidazo[1,2-a]pyridine (9) :**

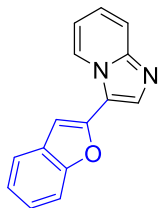

(Eluent: 30% (EtOAc/hexane); 70% yield (32.7 mg); yellow solid, Mp: 190-192 °C;  $^1\text{H}$  NMR (600 MHz,  $\text{CDCl}_3$ )  $\delta$  8.78 (d,  $J = 6.9$  Hz, 1H), 8.08 (s, 1H), 7.73 (d,  $J = 9.0$  Hz, 1H), 7.62 (dd,  $J = 7.5, 1.4$  Hz, 1H), 7.57 (d,  $J = 8.1$  Hz, 1H), 7.36 – 7.26 (m, 3H), 7.02 – 6.93 (m, 2H).  $^{13}\text{C}$  NMR (150 MHz,  $\text{CDCl}_3$ )  $\delta$  154.4, 146.8, 134.3, 128.5, 125.5, 125.1, 124.4, 123.4, 120.8, 118.3, 113.4, 111.1, 102.2.

**3-(benzofuran-2-yl)-2-methylimidazo[1,2-a]pyridine (12) :**

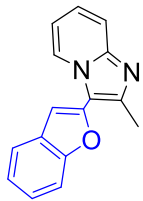

(Eluent: 30% (EtOAc/hexane); 45% yield (22.3 mg); brown solid, Mp: 200-202 °C;  $^1\text{H}$  NMR (500 MHz,  $\text{CDCl}_3$ )  $\delta$  8.74 (dd,  $J = 6.9, 1.2$  Hz, 1H), 7.66 – 7.59 (m, 2H), 7.57 (dt,  $J = 8.2, 1.0$  Hz, 1H), 7.35 – 7.28 (m, 2H), 7.26 – 7.23 (m, 1H), 6.92 – 6.86 (m, 2H), 2.67 (d,  $J = 1.0$  Hz, 3H).

### 3-phenylimidazo[1,2-a]pyridine (18)<sup>3</sup> :

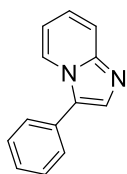

(Eluent: 15% (EtOAc/hexane); white solid, Mp 98-100 °C;  $^1\text{H}$  NMR (600 MHz,  $\text{CDCl}_3$ )  $\delta$  8.30 (d,  $J = 6.9$  Hz, 1H), 7.71 – 7.63 (m, 2H), 7.57 – 7.45 (m, 4H), 7.39 (t,  $J = 7.2$  Hz, 1H), 7.16 (dd,  $J = 9.1, 6.6$  Hz, 1H), 6.77 (t,  $J = 6.8$  Hz, 1H).  $^{13}\text{C}$  NMR (150 MHz,  $\text{CDCl}_3$ )  $\delta$  145.9, 132.2, 129.0, 128.0, 127.9, 127.8, 125.5, 124.1, 123.1, 118.0, 112.3.

### 3-(benzofuran-2-yl)-2-phenylimidazo[1,2-a]pyridine (20) :

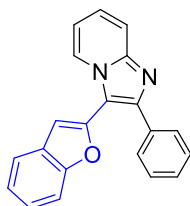

(Eluent: 15% (EtOAc/hexane); yellow solid, Mp: 206-208 °C;  $^1\text{H}$  NMR (600 MHz,  $\text{CDCl}_3$ )  $\delta$  8.49 (d,  $J = 6.9$  Hz, 1H), 7.81 (d,  $J = 7.2$  Hz, 2H), 7.72 (d,  $J = 8.8$  Hz, 1H), 7.61 (d,  $J = 7.7$  Hz, 1H), 7.57 (d,  $J = 8.2$  Hz, 1H), 7.37 (dt,  $J = 12.9, 7.0$  Hz, 4H), 7.31 (d,  $J = 8.9$  Hz, 2H), 6.92 – 6.86 (m, 2H).  $^{13}\text{C}$  NMR (150 MHz,  $\text{CDCl}_3$ )  $\delta$  155.0, 146.4, 145.9, 133.9, 128.6, 128.6, 128.4, 125.9, 125.3, 124.9, 123.4, 121.3, 117.8, 113.2, 112.0, 111.5, 107.6. HRMS-ESI ( $m/z$ )  $[\text{M}+\text{H}]^+$  calcd. For  $\text{C}_{21}\text{H}_{14}\text{N}_2\text{ONa}$ : 333.0999; Found: 333.0989.

### 1-phenylbenzofuro[3,2-a]imidazo[5,1,2-cd]indolizine and

**1-phenylbenzofuro[2,3-a]imidazo[5,1,2-cd]indolizine (3a and 3a') :**

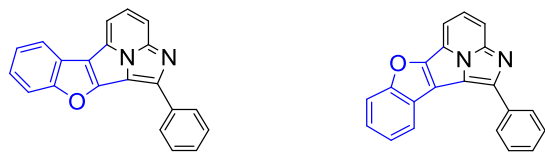

(Eluent: 15% (EtOAc/hexane);  $^1\text{H}$  NMR (500 MHz,  $\text{CDCl}_3$ )  $\delta$  8.64 – 8.61 (m, 1H), 8.60 – 8.56 (m, 3H), 8.37 (d,  $J = 7.9$  Hz, 1H), 8.23 – 8.16 (m, 5H), 8.13 – 8.09 (m, 1H), 8.04 – 7.98 (m, 1H), 7.83 – 7.79 (m, 2H), 7.75 (t,  $J = 7.8$  Hz, 3H), 7.70 – 7.64 (m, 2H), 7.64 – 7.61 (m, 2H), 7.59 – 7.53 (m, 3H), 7.51 – 7.48 (m, 1H).

**References:**

1. D. C. Mohan, R. R. Donthiri, S. N. Rao, S. Adimurthy, *Adv. Synth. Catal.* 2013, **355**, 2217 – 222.
2. D. Cao, Z. Liu, P. Verwilst, S. Koo, P. angjili, J. S. Kim, W, Lin, *Chem. Rev.* 2019, **119**, 10403.
3. D. A. Babar, H. B. Rode, *Eur. J. Org. Chem.* 2020, 1823–1827.

# $^1\text{H}$ NMR and $^{13}\text{C}$ NMR Spectra

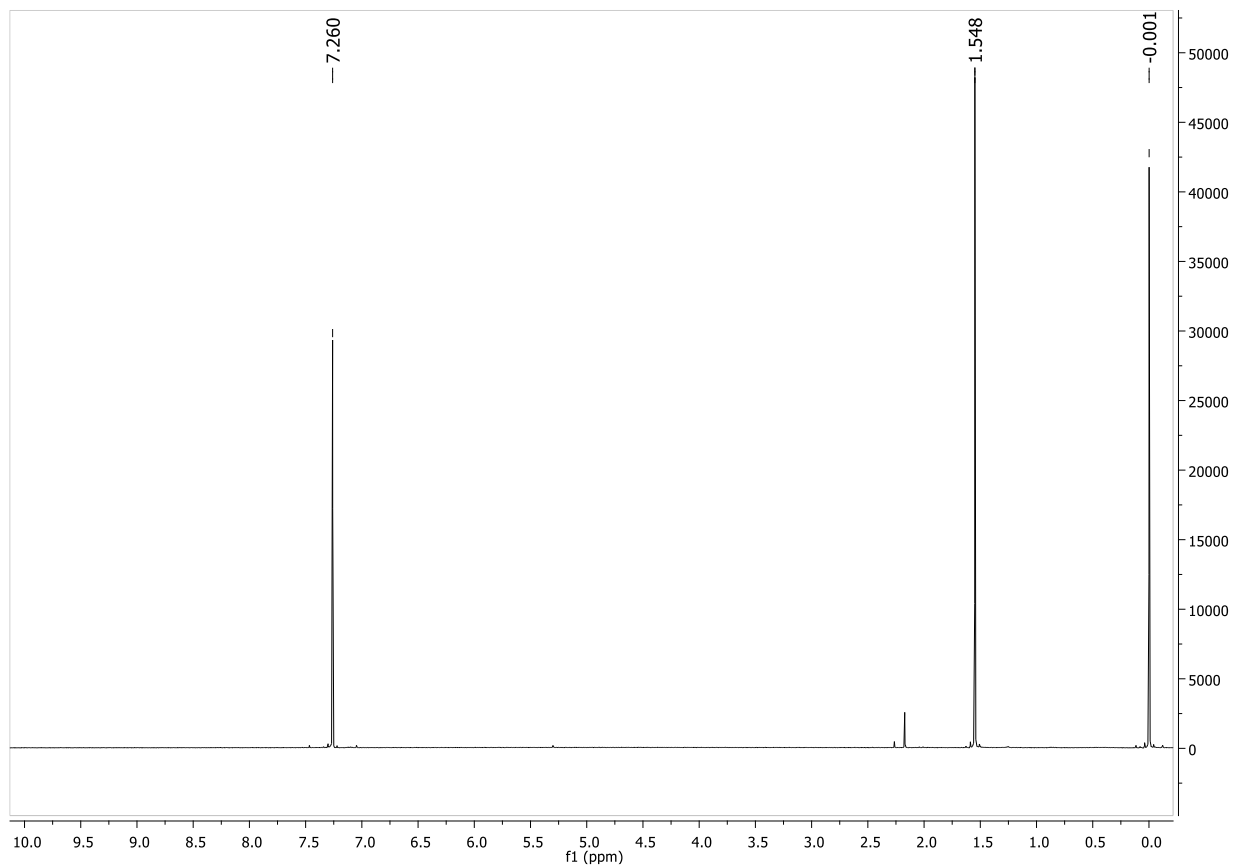

$^1\text{H}$  NMR of  $\text{CDCl}_3$

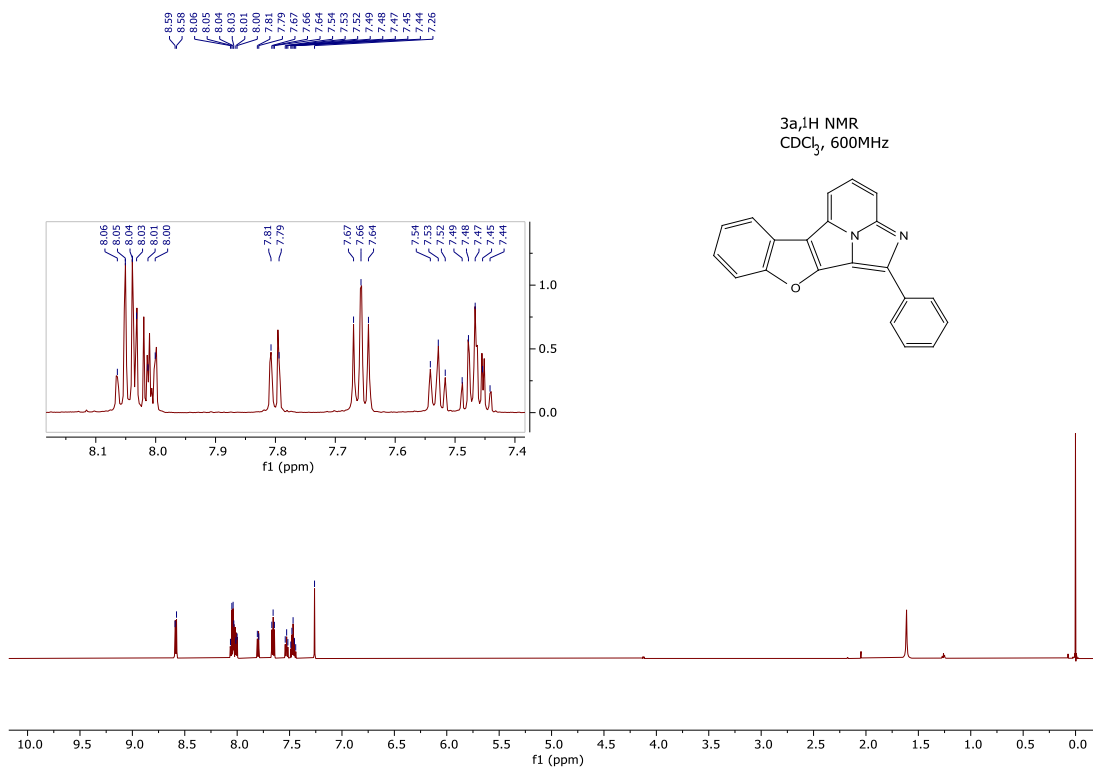

<sup>1</sup>H NMR of 3a

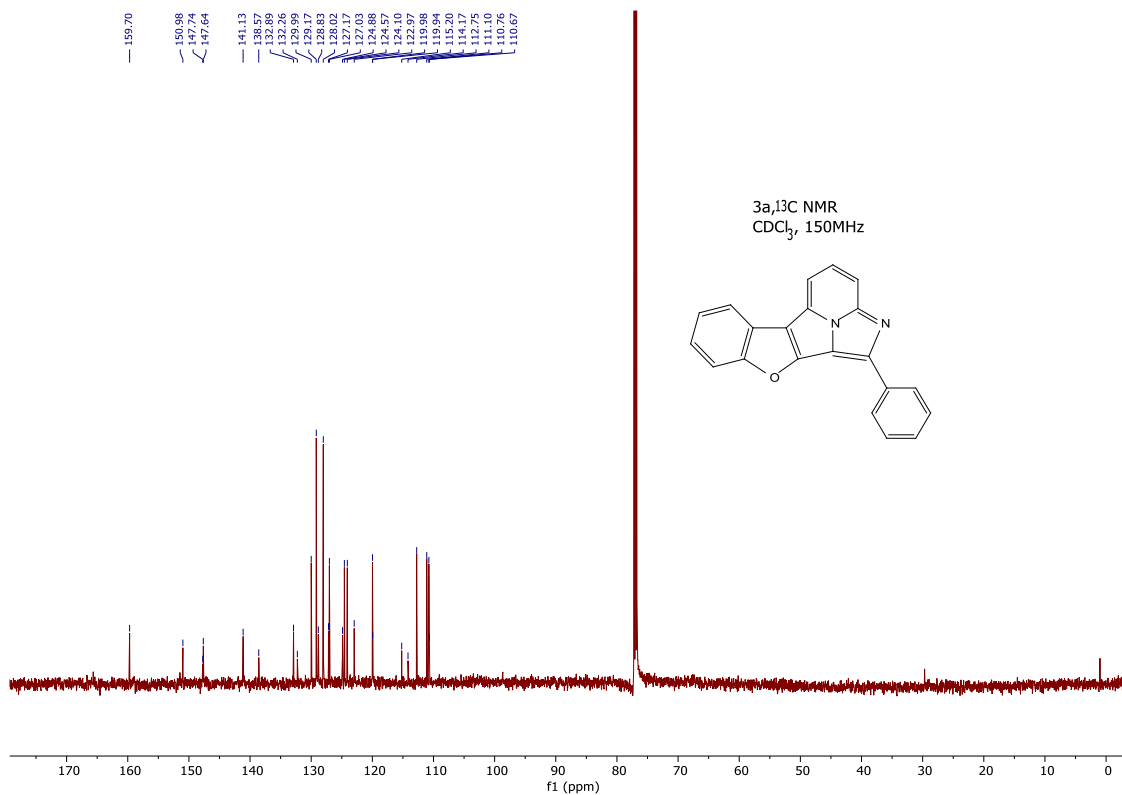

<sup>13</sup>C NMR of 3a

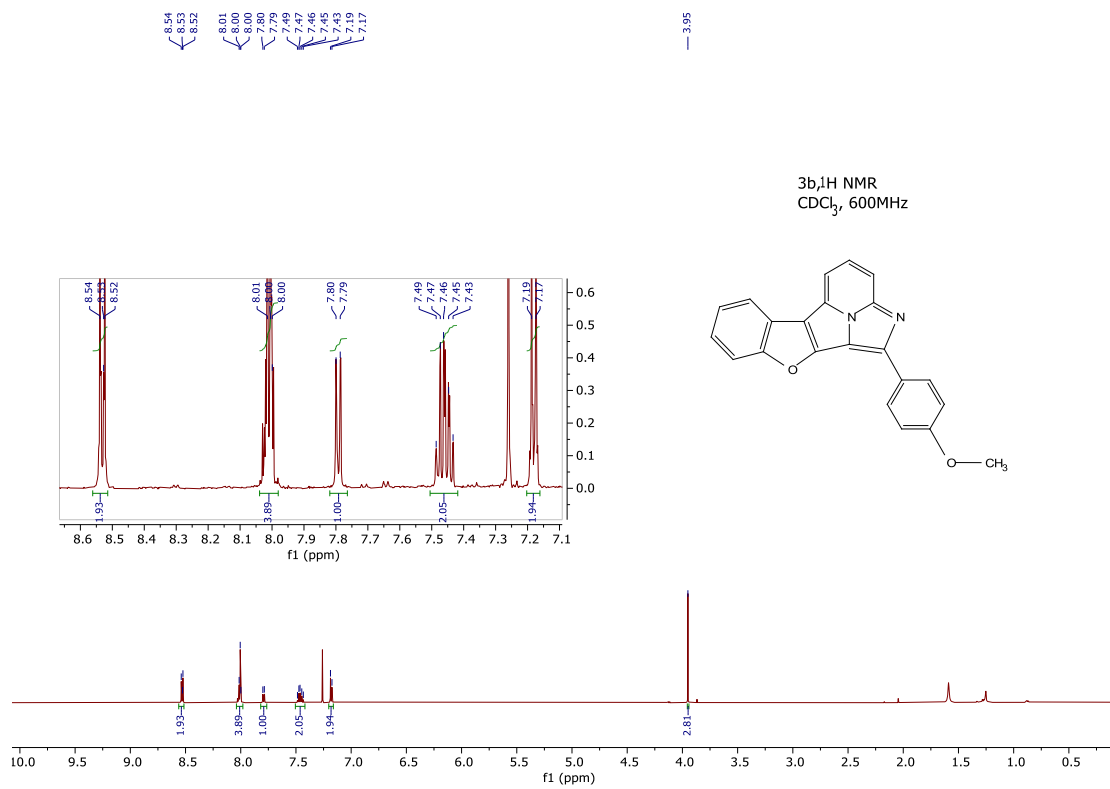

<sup>1</sup>H NMR of 3b

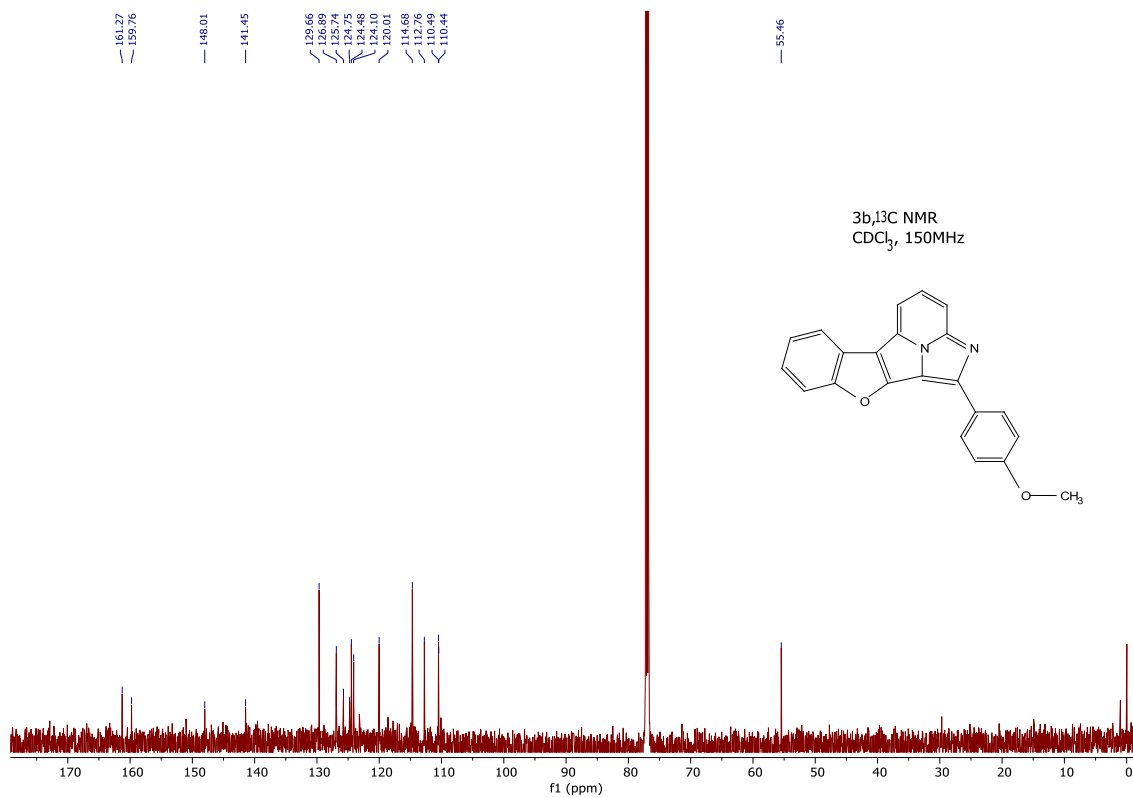

<sup>13</sup>C NMR of 3b



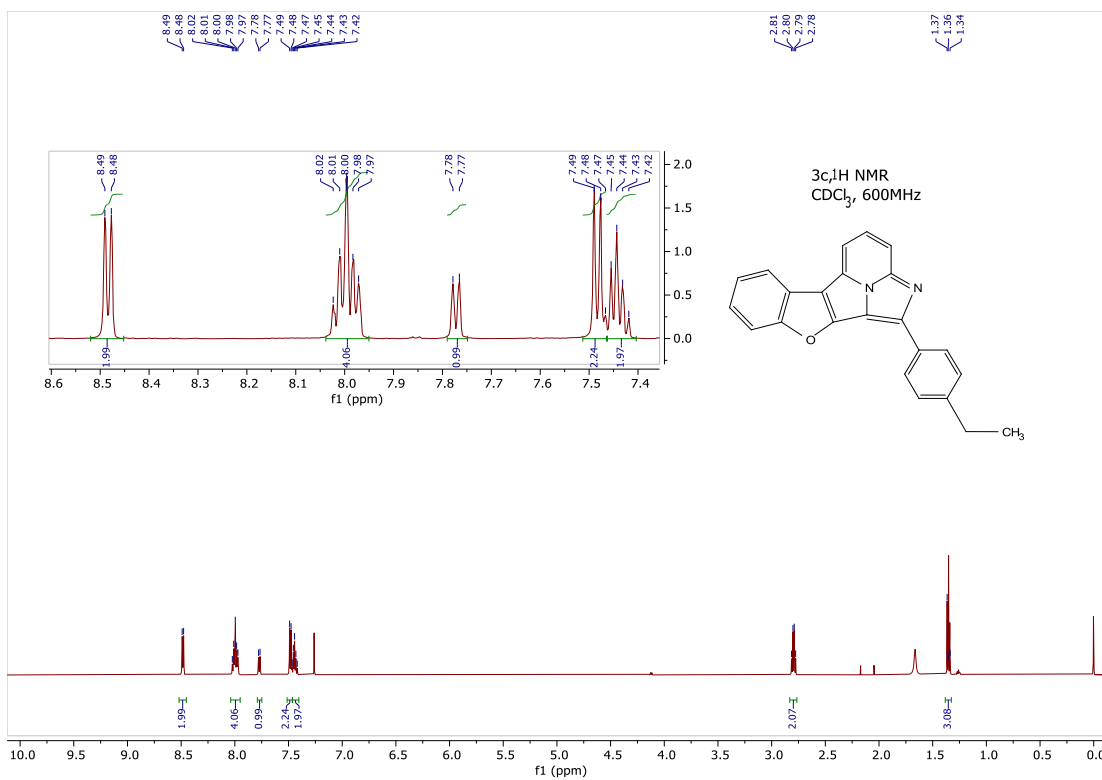

<sup>1</sup>H NMR of 3c

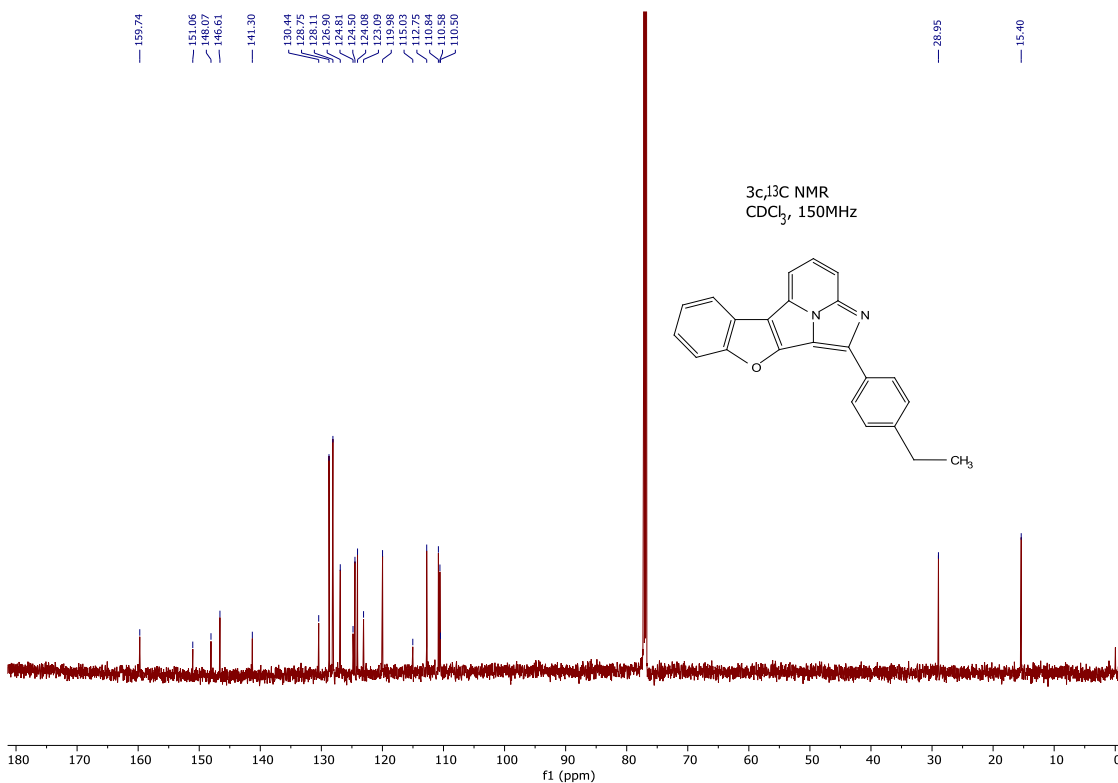

<sup>13</sup>C NMR of 3c

8.52  
8.51  
8.50  
8.49  
8.01  
8.00  
7.99  
7.98  
7.96  
7.76  
7.75  
7.47  
7.45  
7.44  
7.42  
7.33  
7.31  
7.30

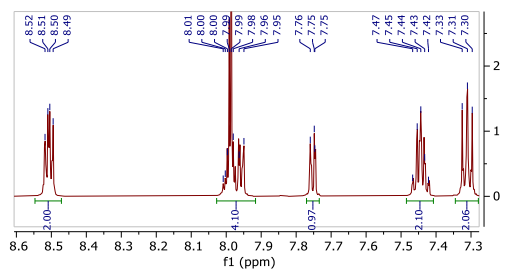

3d, <sup>1</sup>H NMR  
CDCl<sub>3</sub>, 600MHz

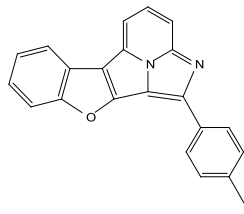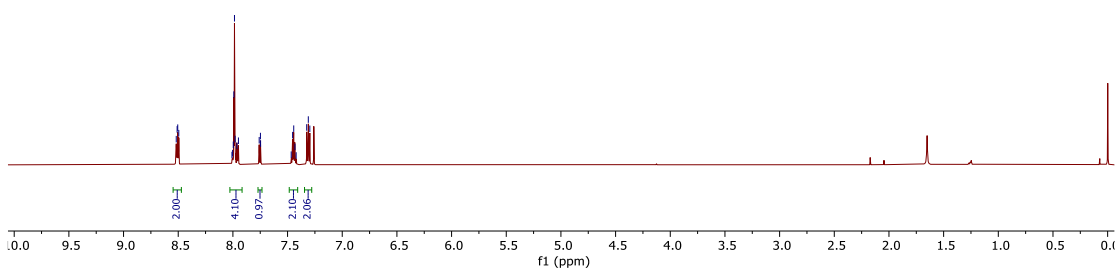

<sup>1</sup>H NMR of 3d

164.70  
163.04  
159.69  
150.80  
146.57  
141.15  
129.90  
129.85  
129.25  
127.10  
126.69  
124.69  
124.16  
122.95  
120.01  
118.21  
115.22  
112.75  
110.86  
110.34

3d, <sup>13</sup>C NMR  
CDCl<sub>3</sub>, 150MHz

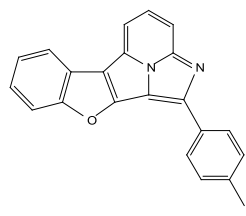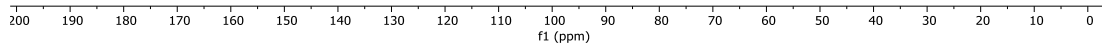

<sup>13</sup>C NMR of 3d

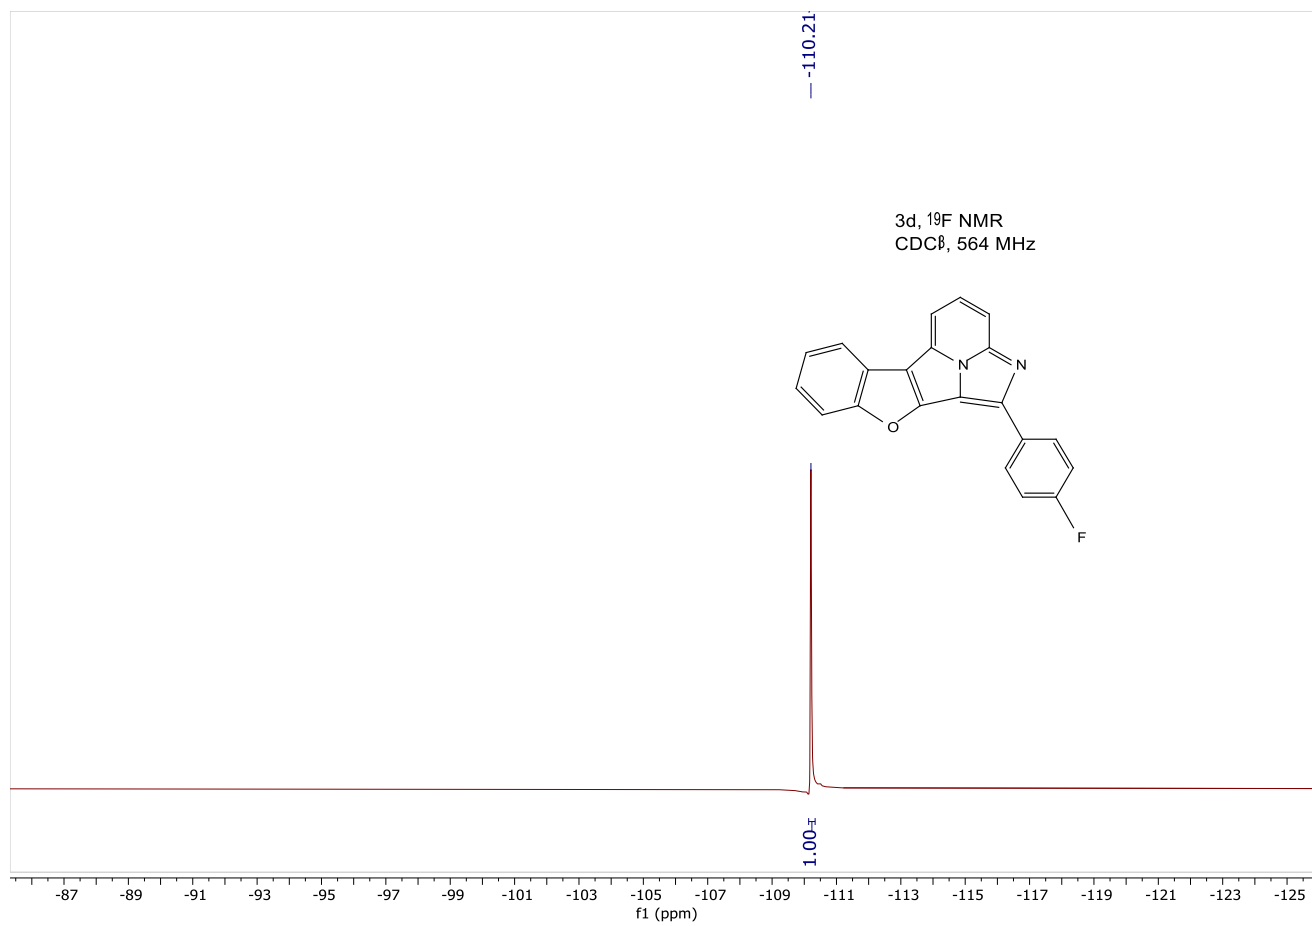

$^{19}\text{F}$  NMR of **3d**

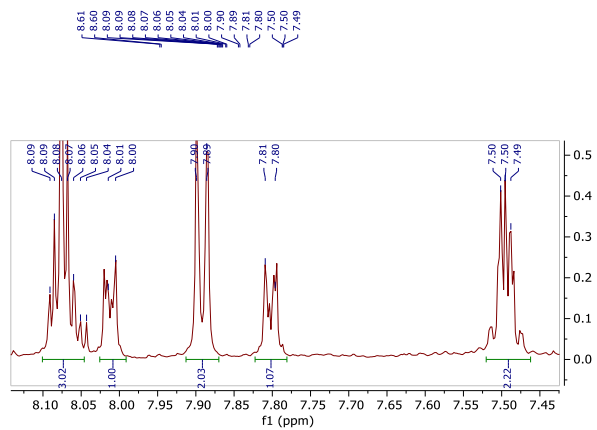

$^3\text{e}$ ,  $^{13}\text{C}$  NMR  
 $\text{CDCl}_3$ , 600MHz

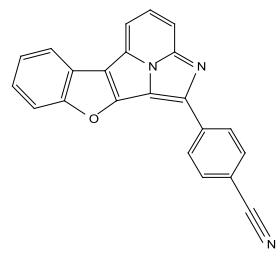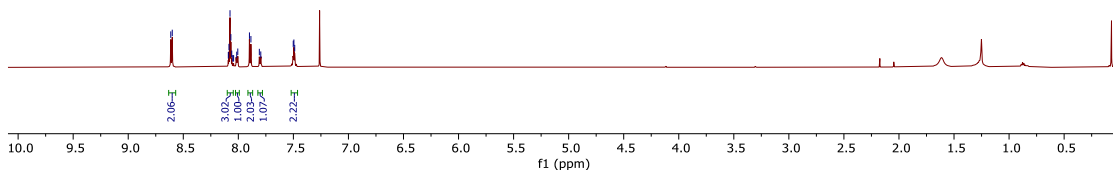

$^1\text{H}$  NMR of  $^3\text{e}$

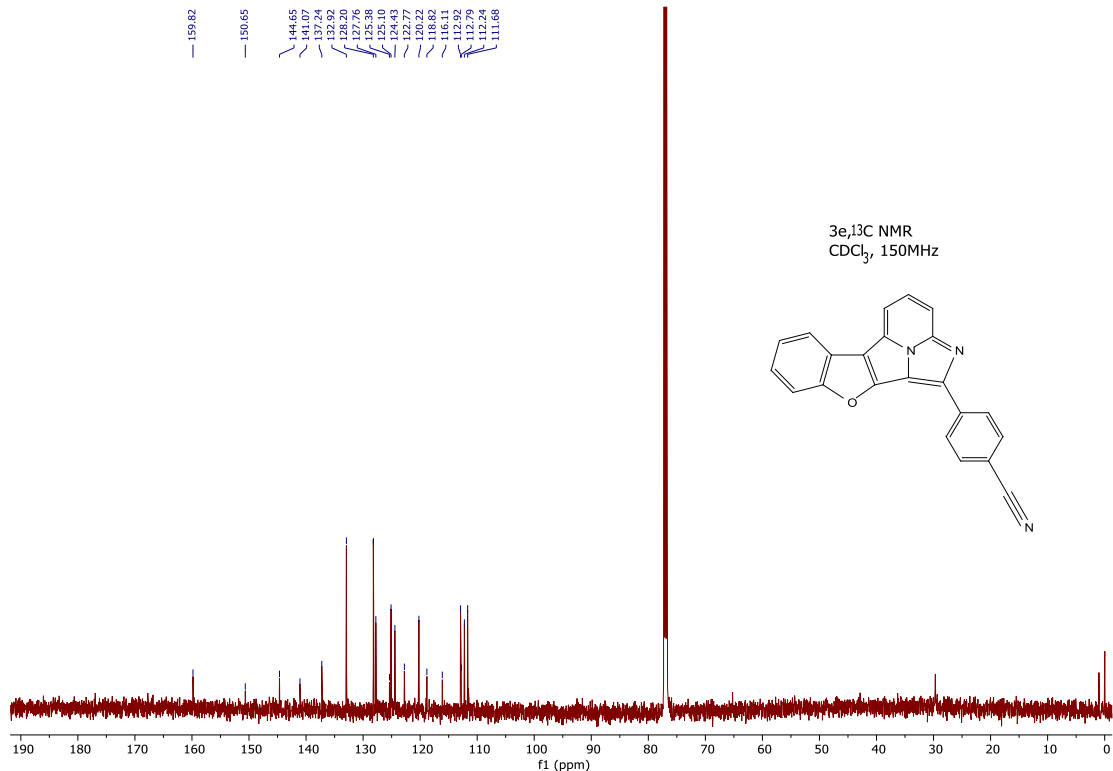

$^3\text{e}$ ,  $^{13}\text{C}$  NMR  
 $\text{CDCl}_3$ , 150MHz

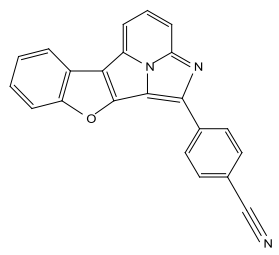

$^{13}\text{C}$  NMR of  $^3\text{e}$

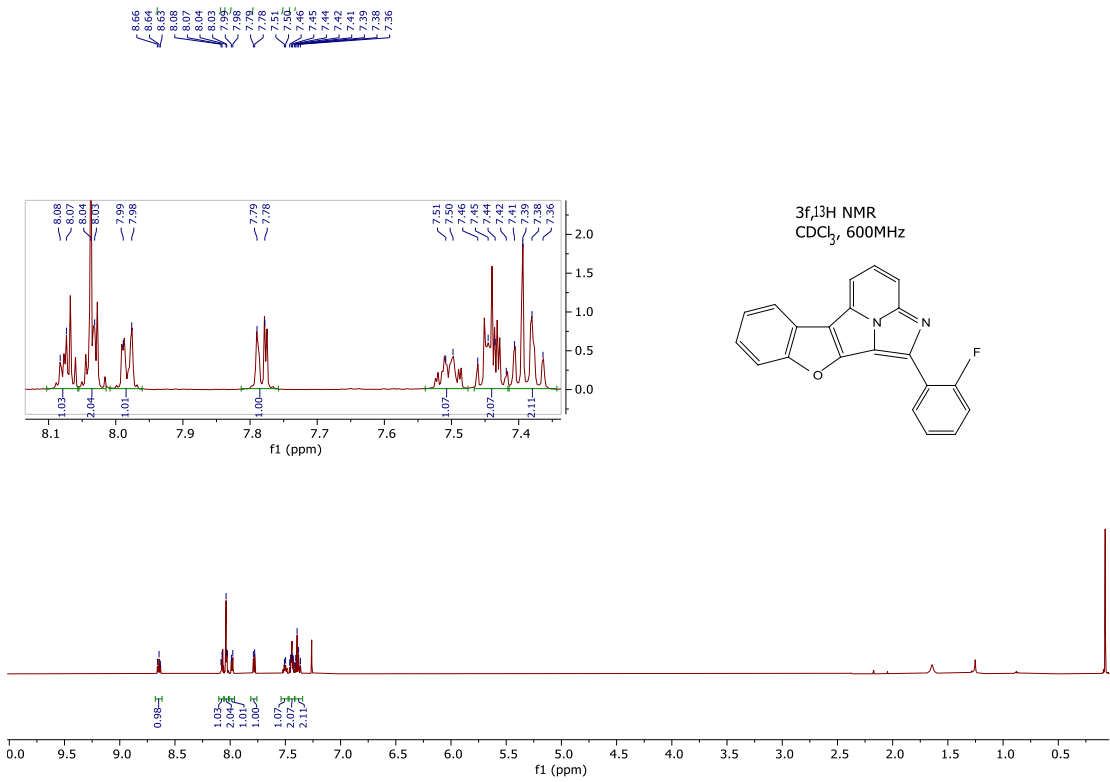

<sup>1</sup>H NMR of 3f

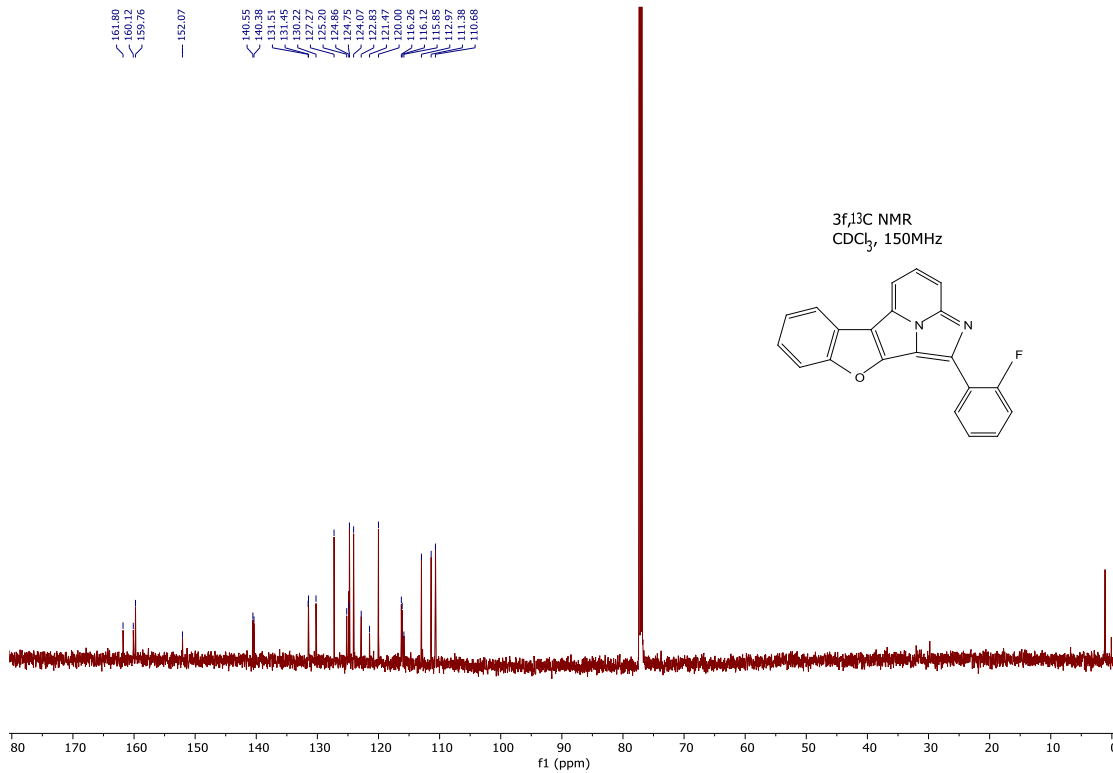

<sup>13</sup>C NMR of 3f

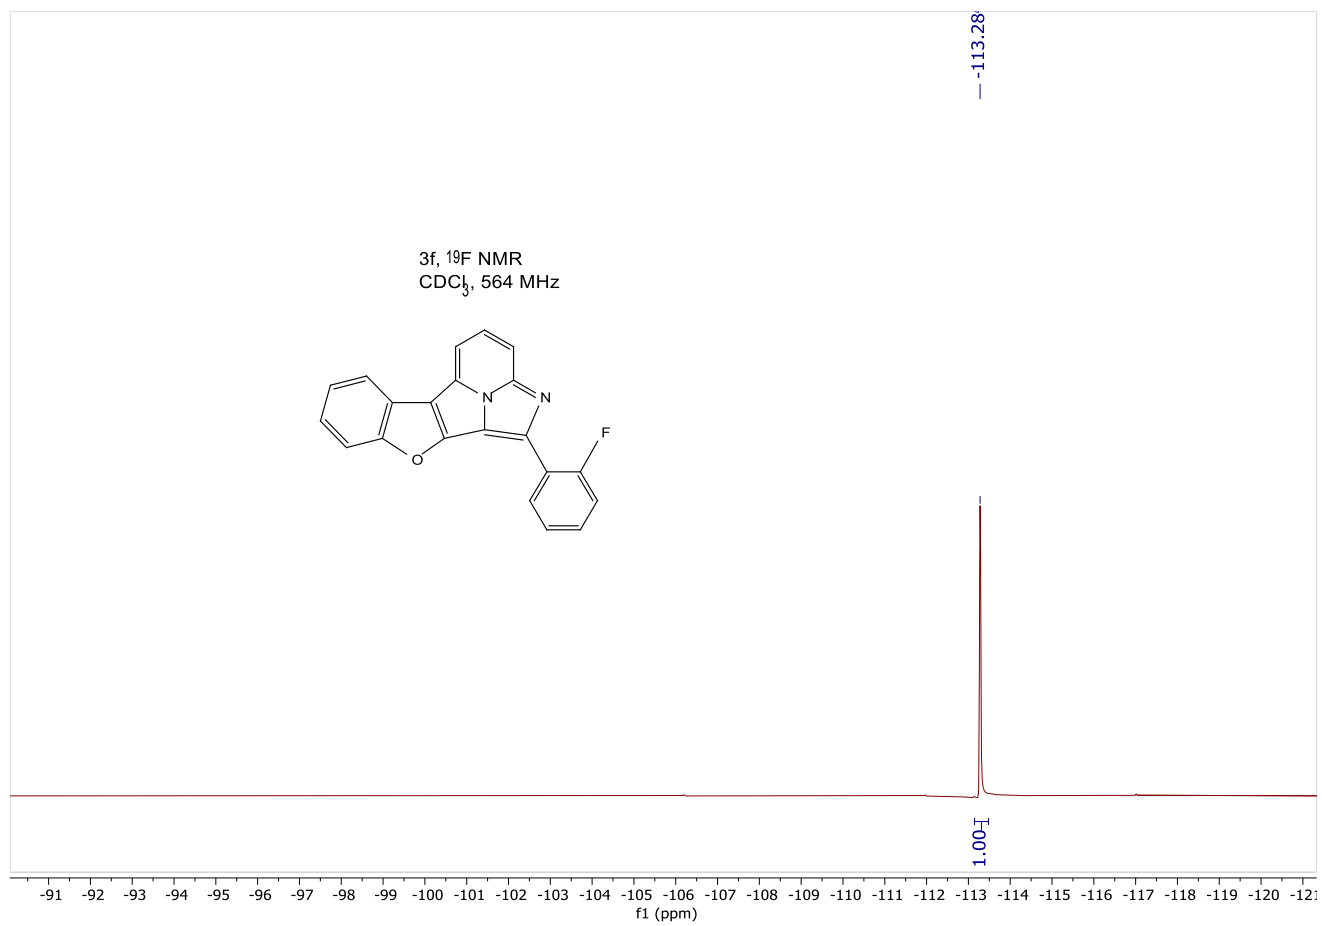

$^{19}\text{F}$  NMR of **3f**



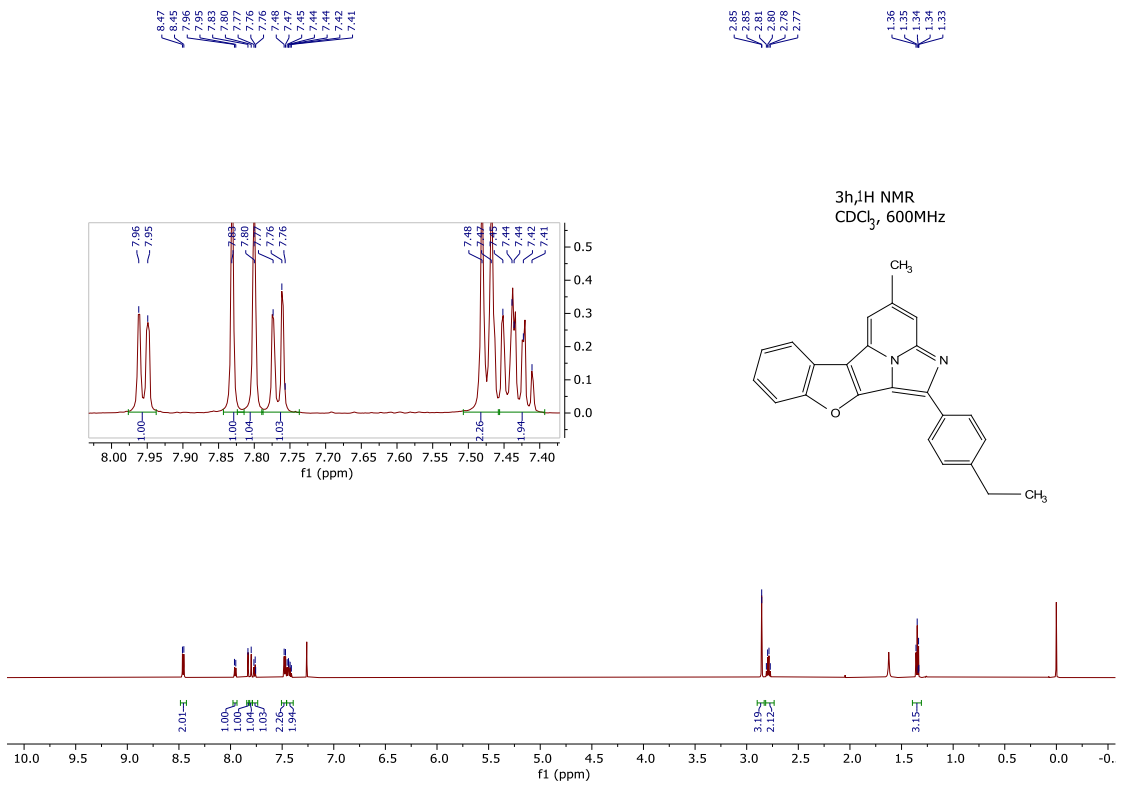

<sup>1</sup>H NMR of 3h

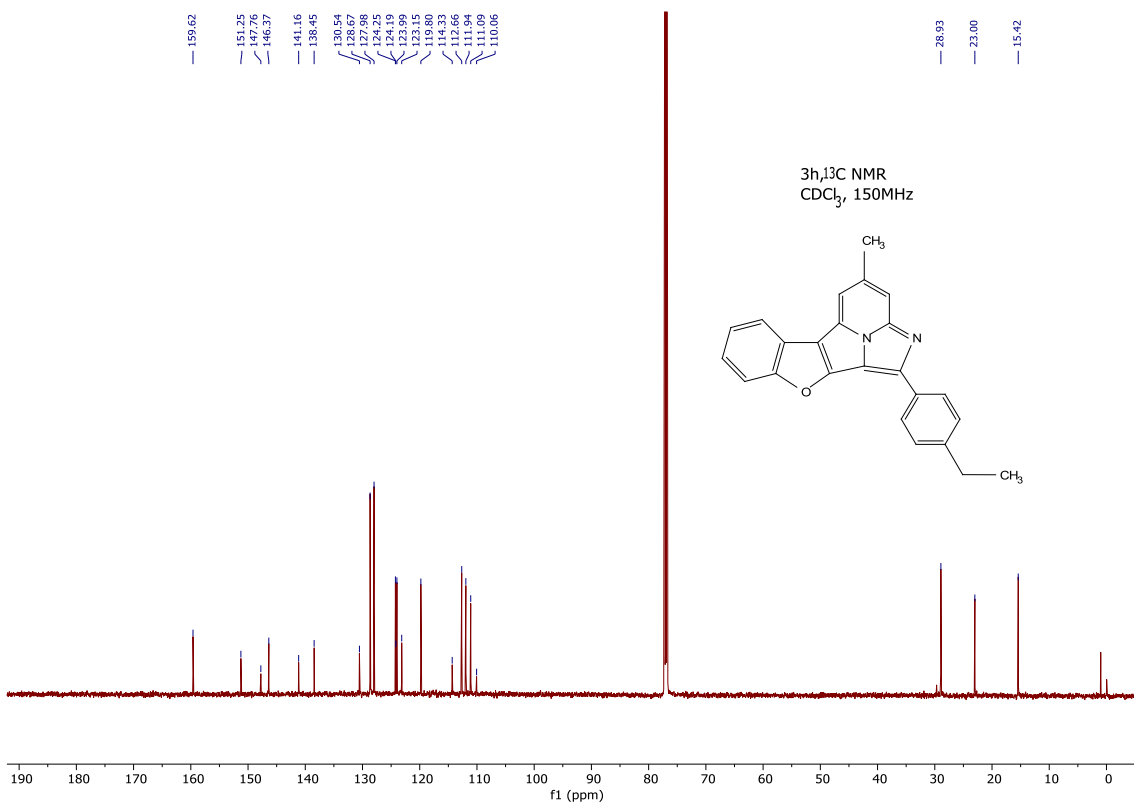

<sup>13</sup>C NMR of 3h



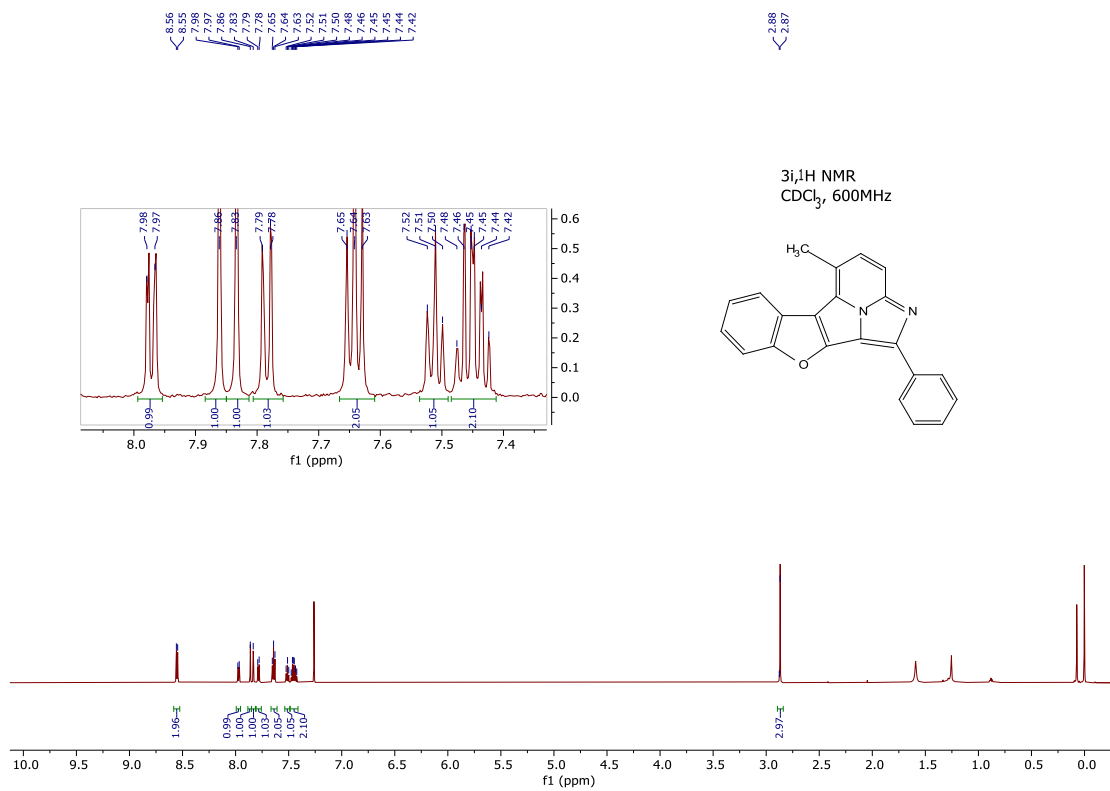

$^1\text{H}$  NMR of **3i**

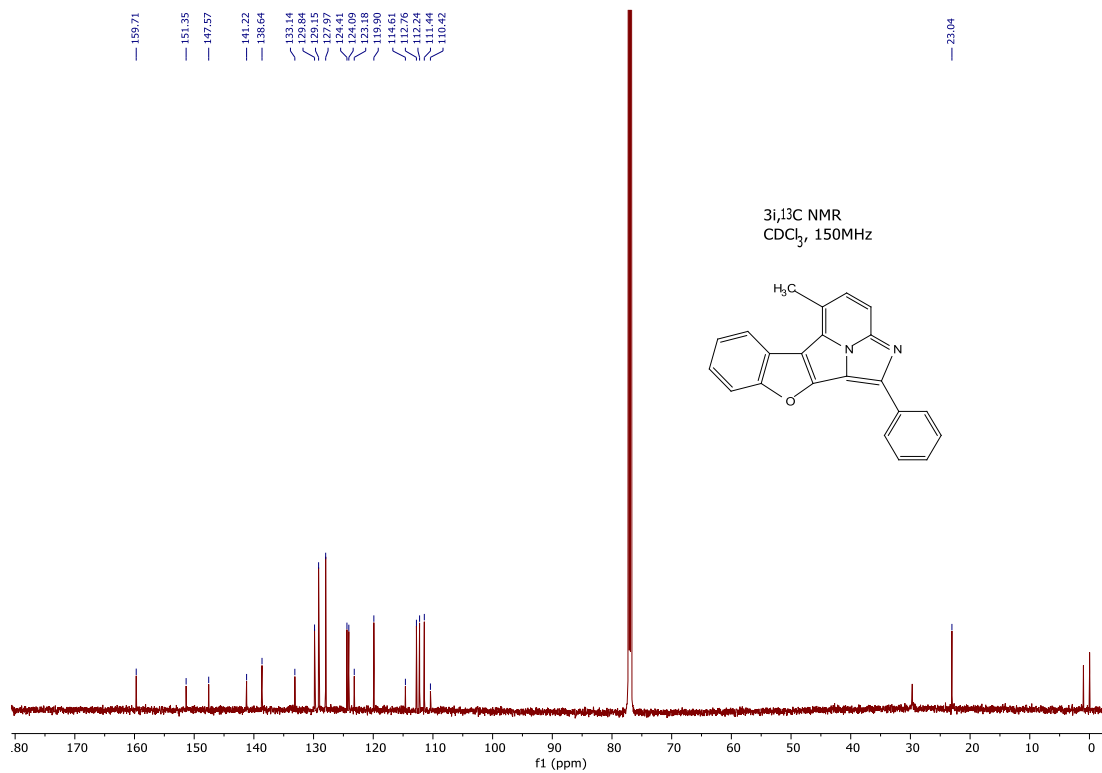

$^13\text{C}$  NMR of **3i**

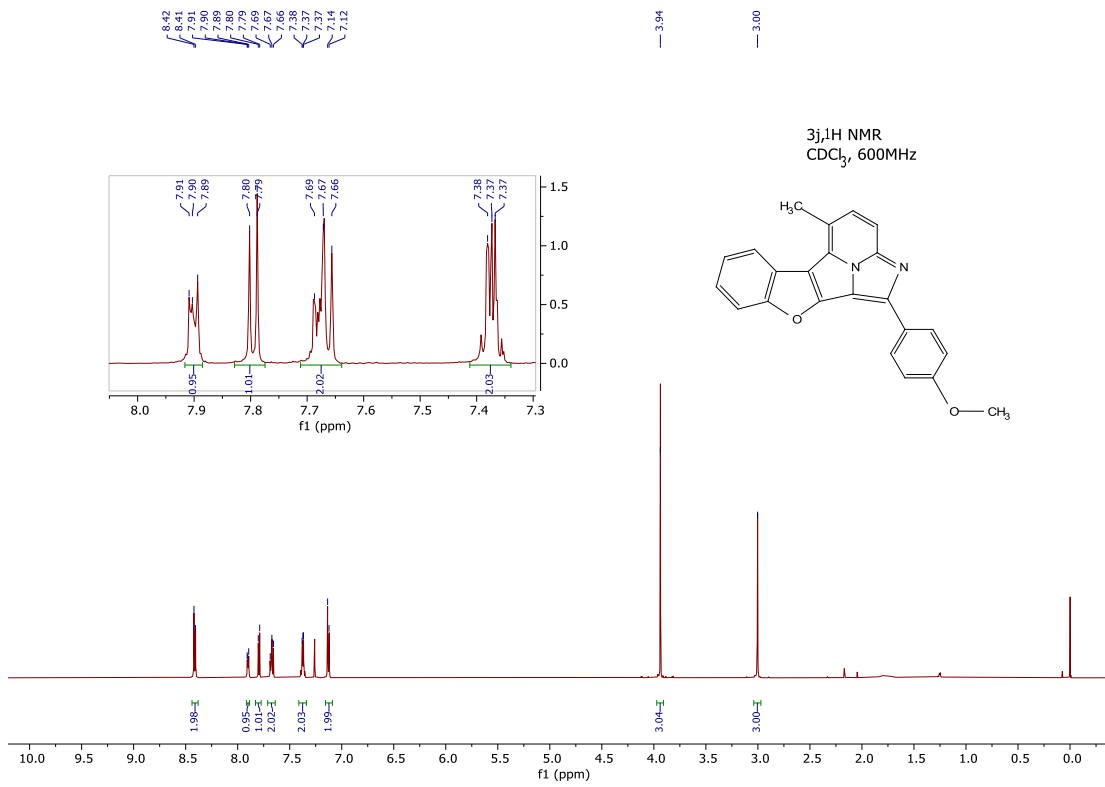

<sup>1</sup>H NMR of 3j

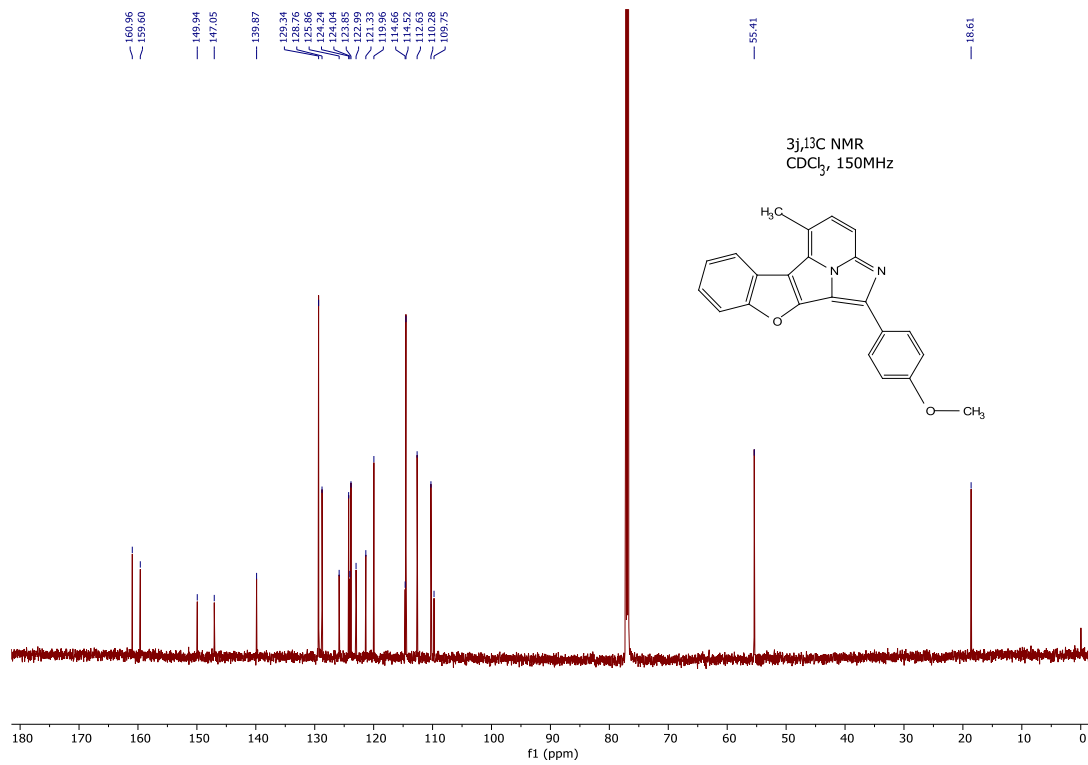

<sup>13</sup>C NMR of 3j

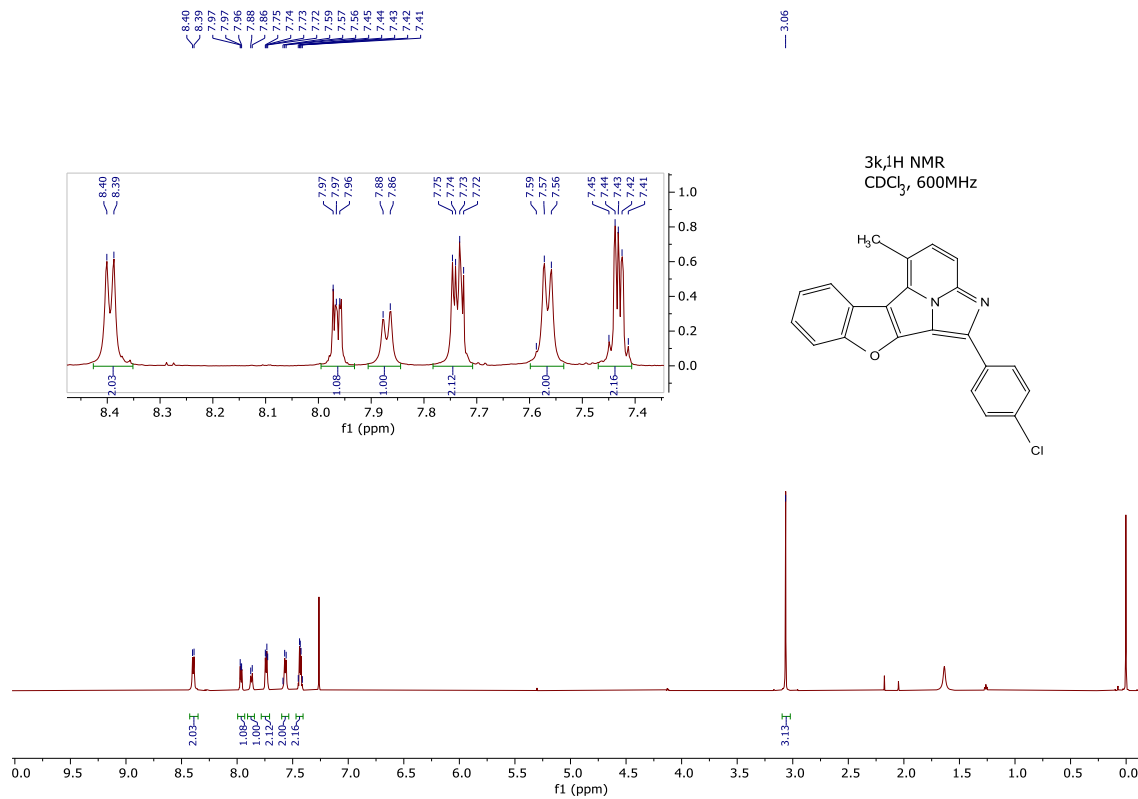

<sup>1</sup>H NMR of **3k**

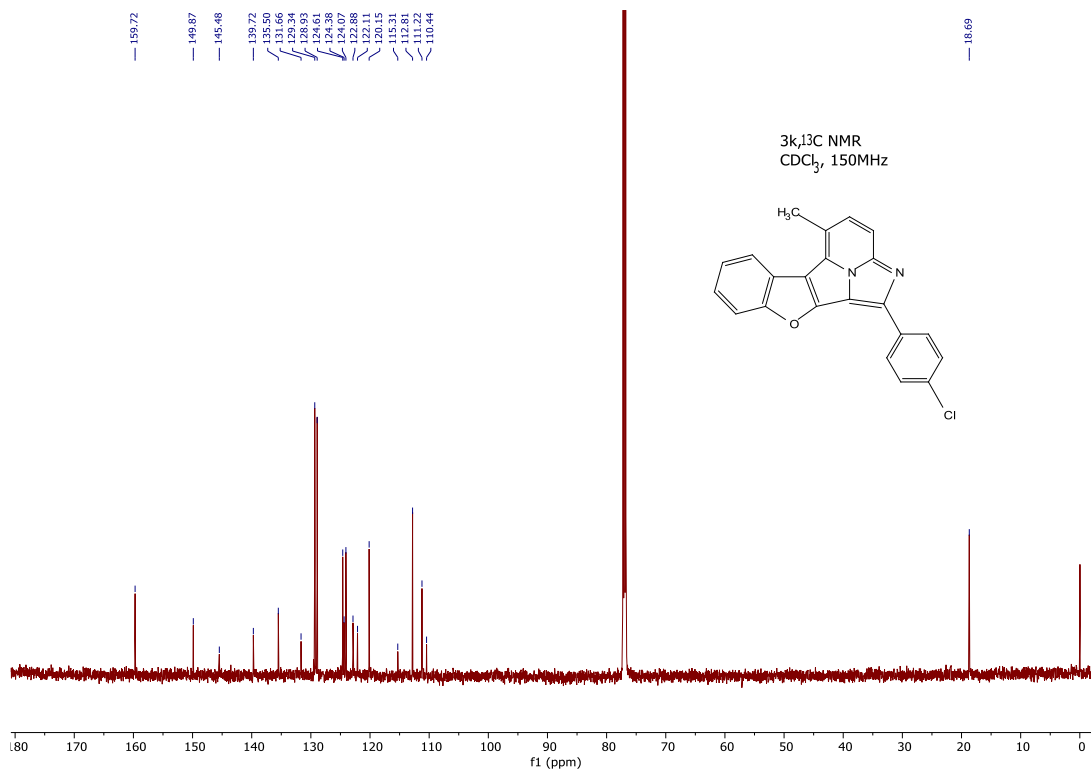

<sup>13</sup>C NMR of **3k**

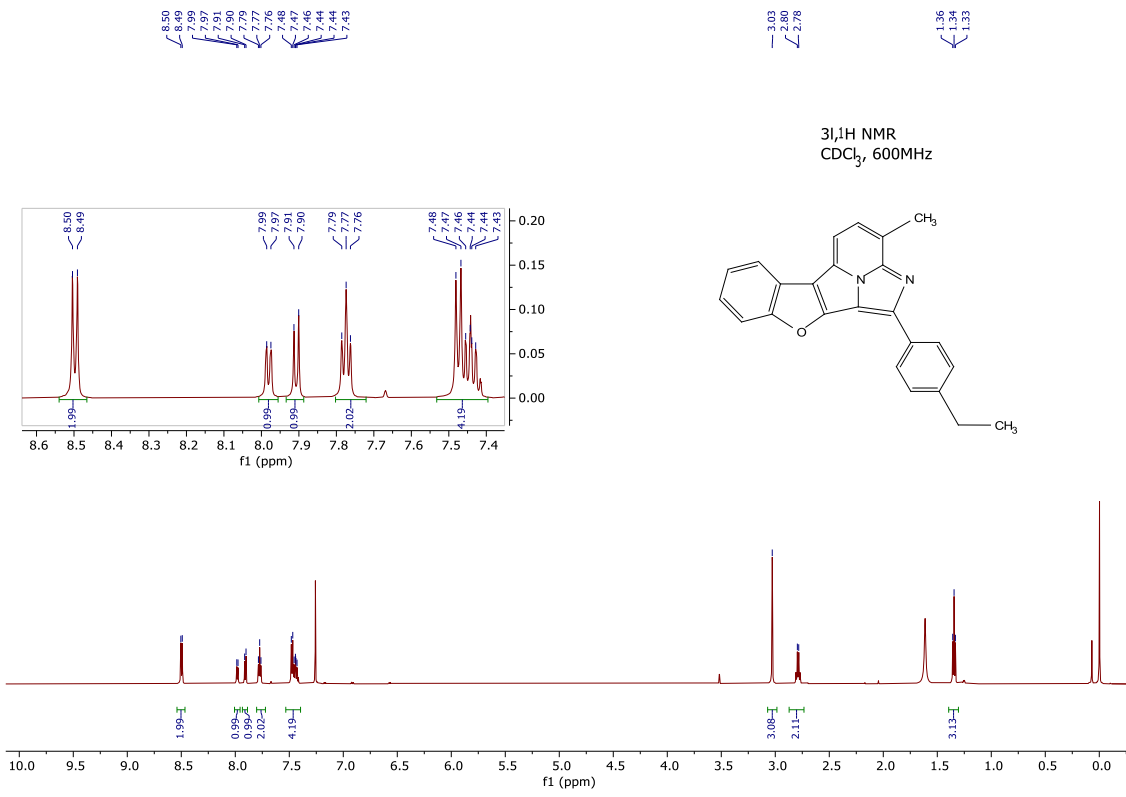

<sup>1</sup>H NMR of 31

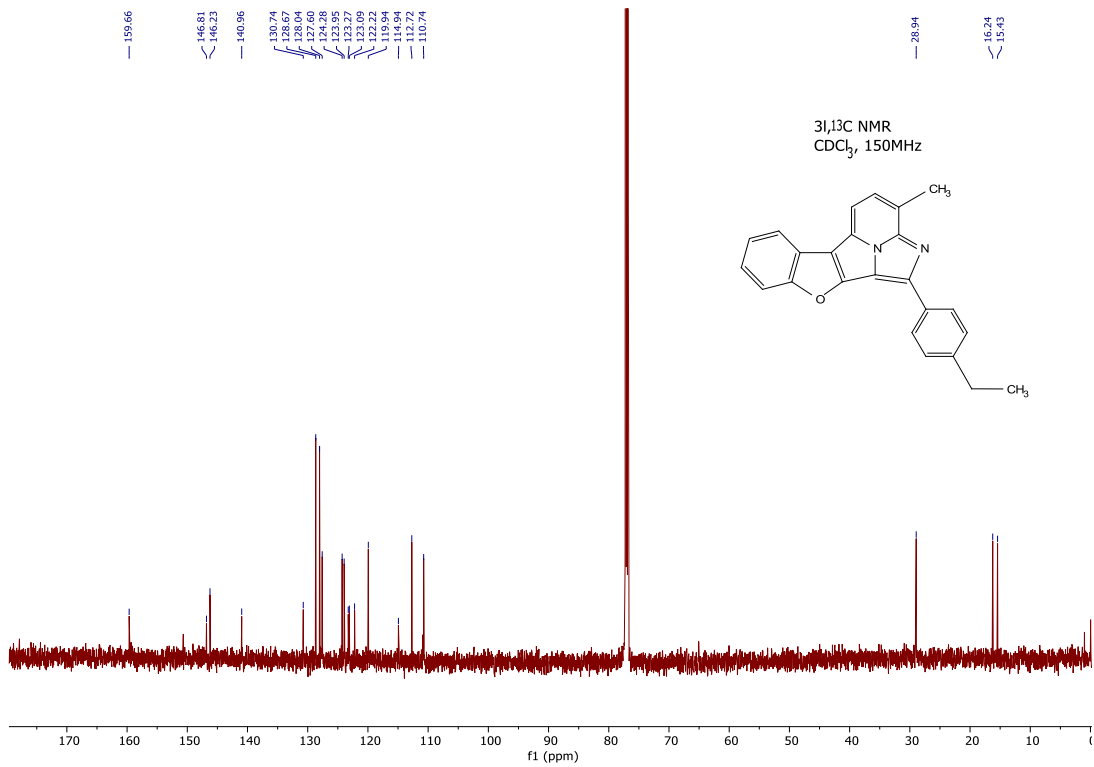

<sup>13</sup>C NMR of 31

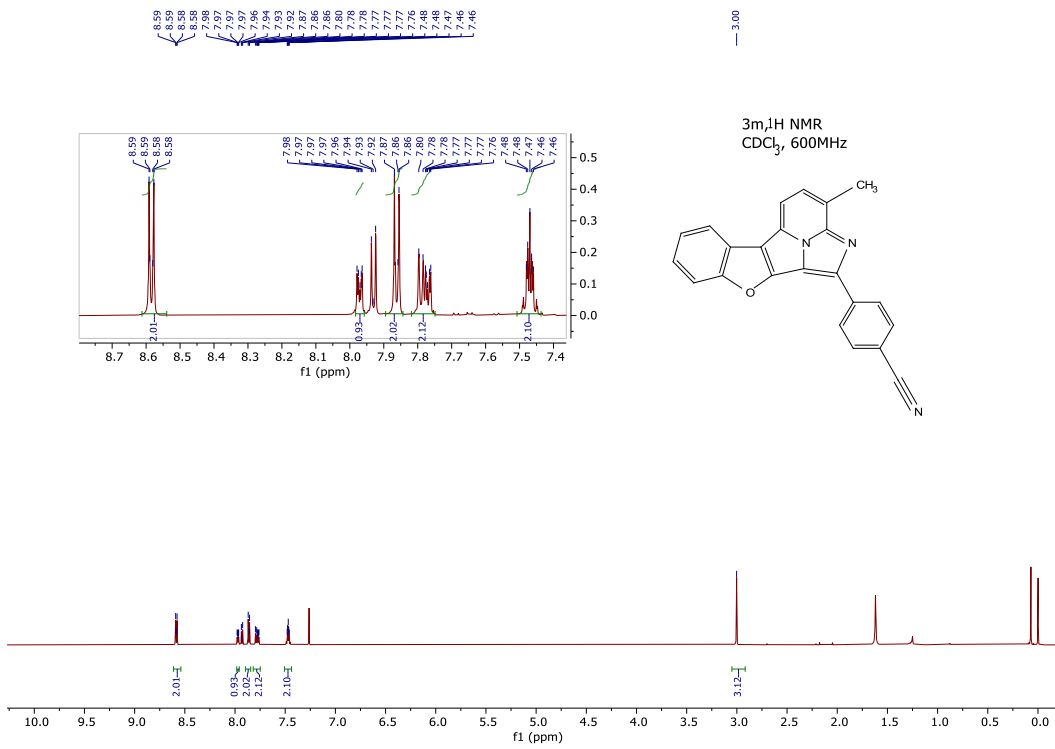

$^1\text{H}$  NMR of 3m

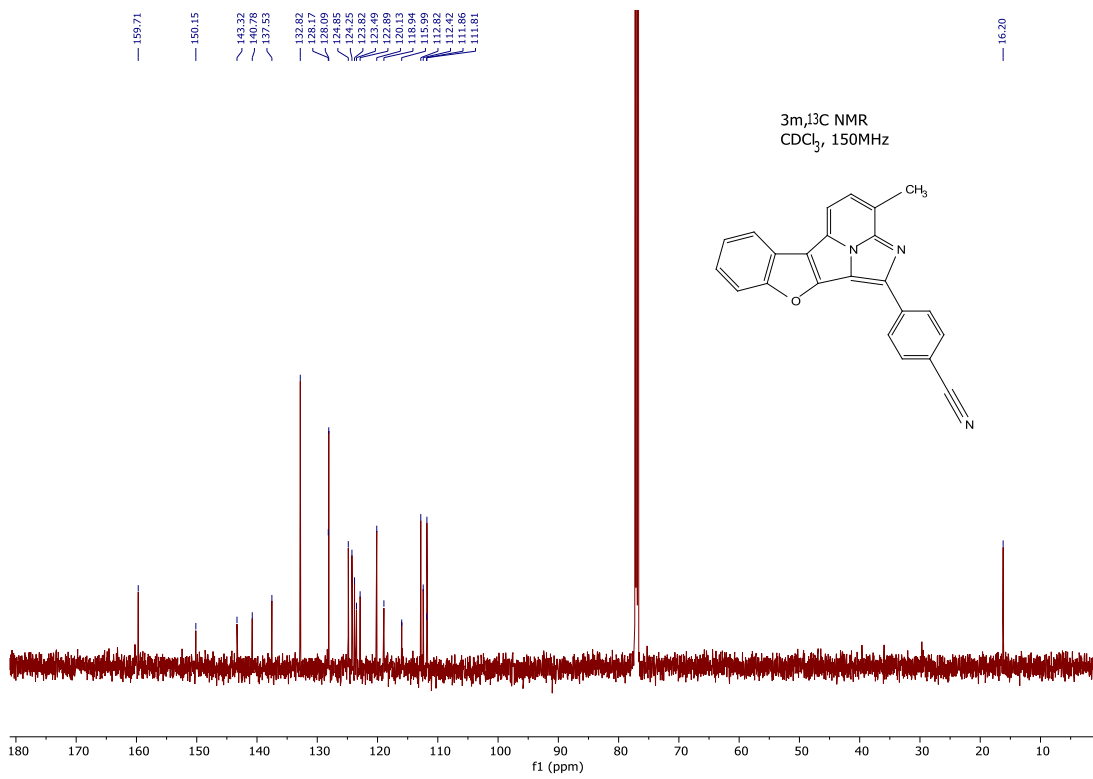

$^{13}\text{C}$  NMR of 3m

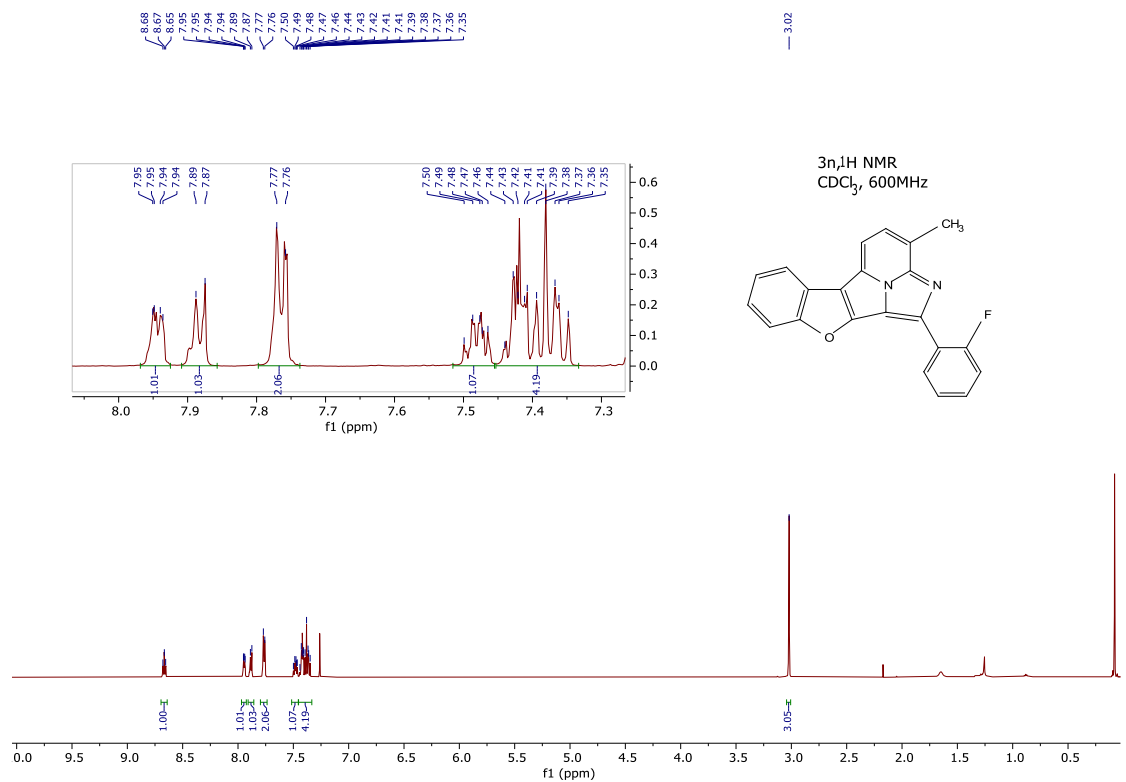

**<sup>1</sup>H NMR of 3n**

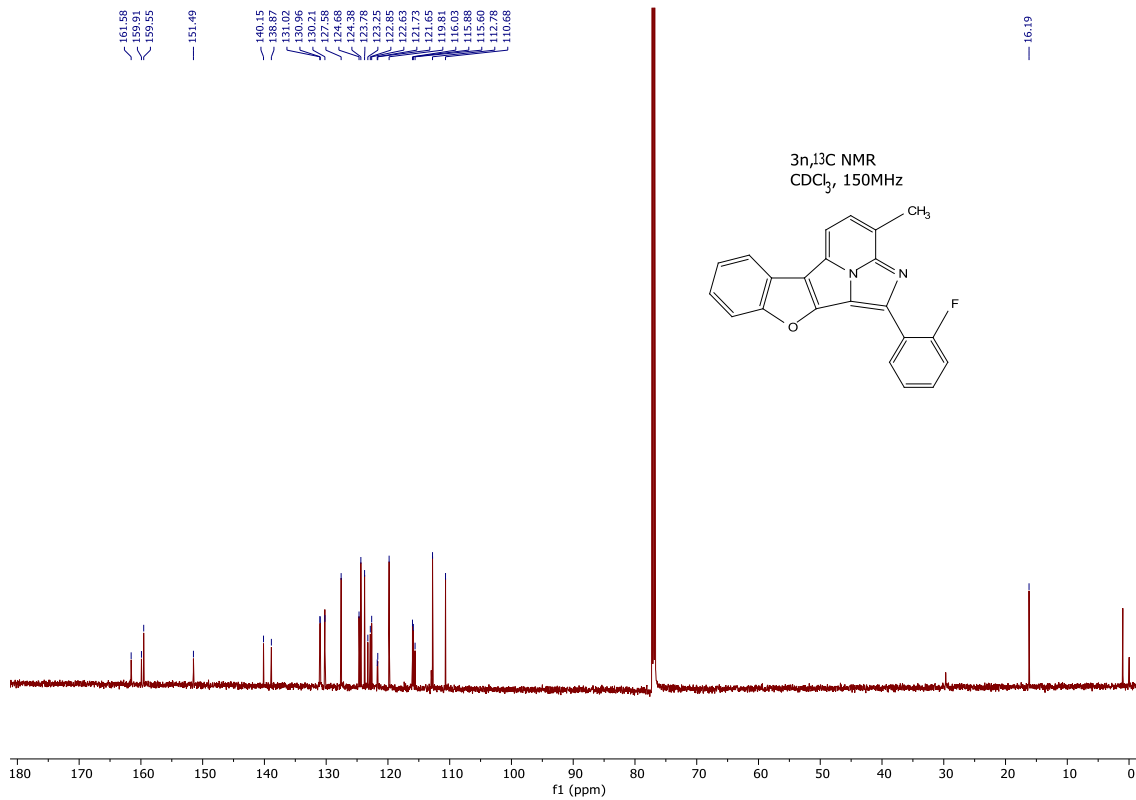

**<sup>13</sup>C NMR of 3n**

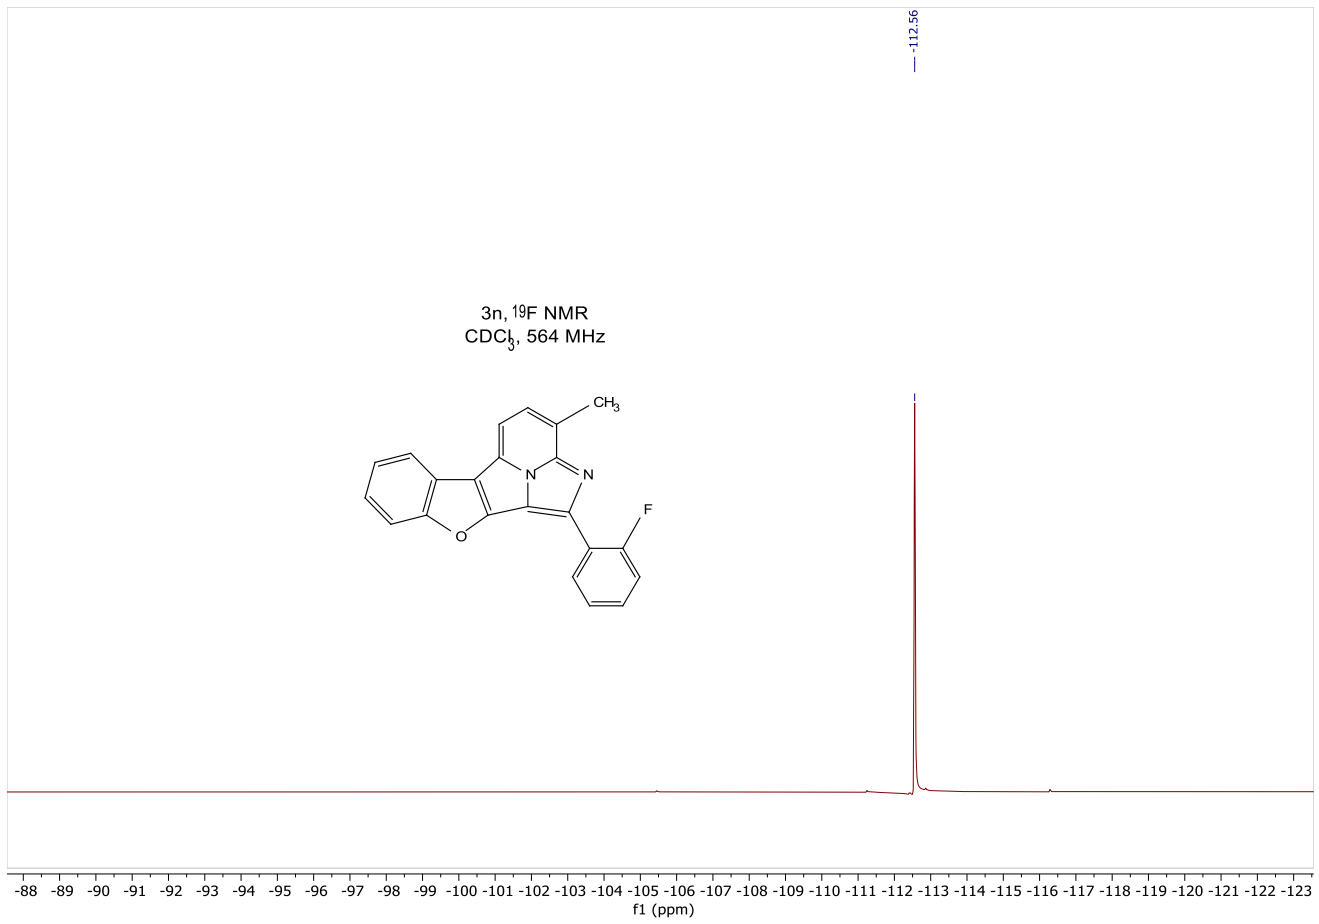

<sup>19</sup>F NMR of **3n**

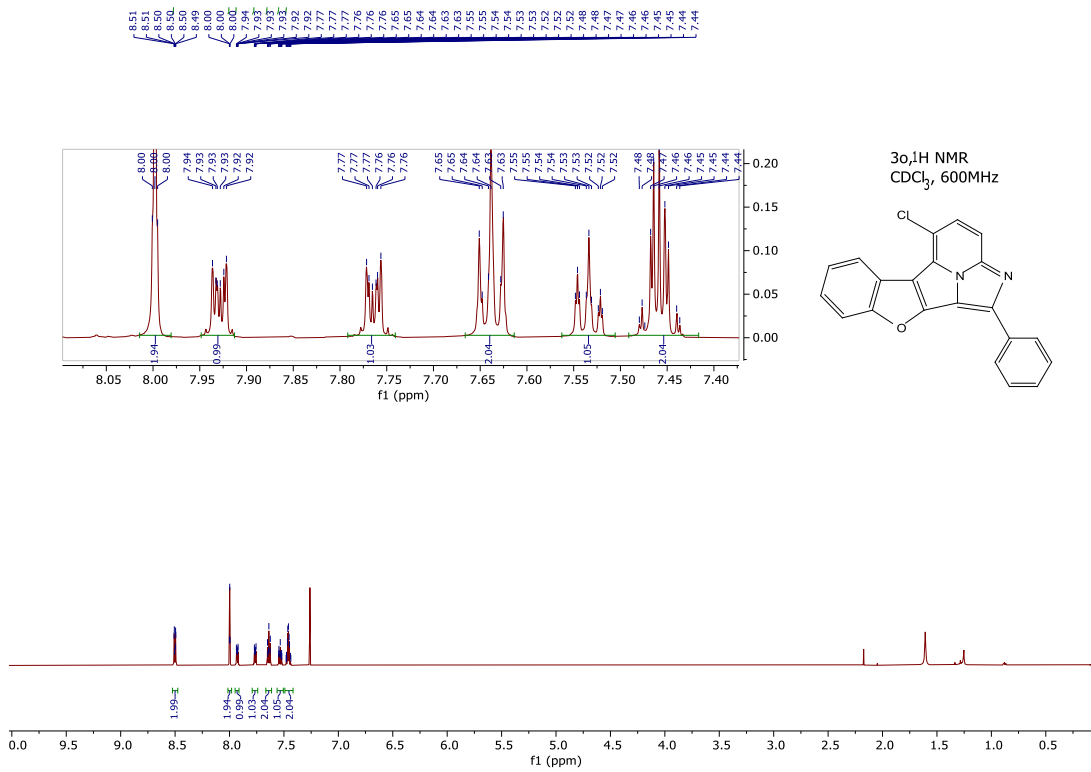

**<sup>1</sup>H NMR of 3o**

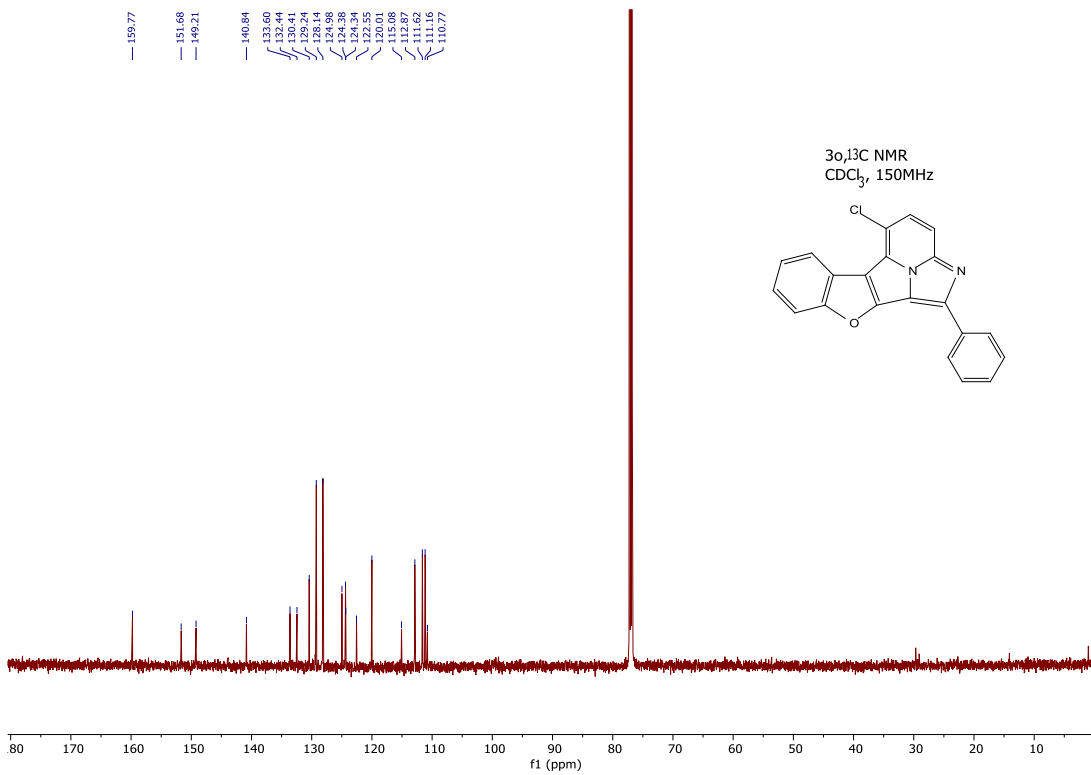

**<sup>13</sup>C NMR of 3o**



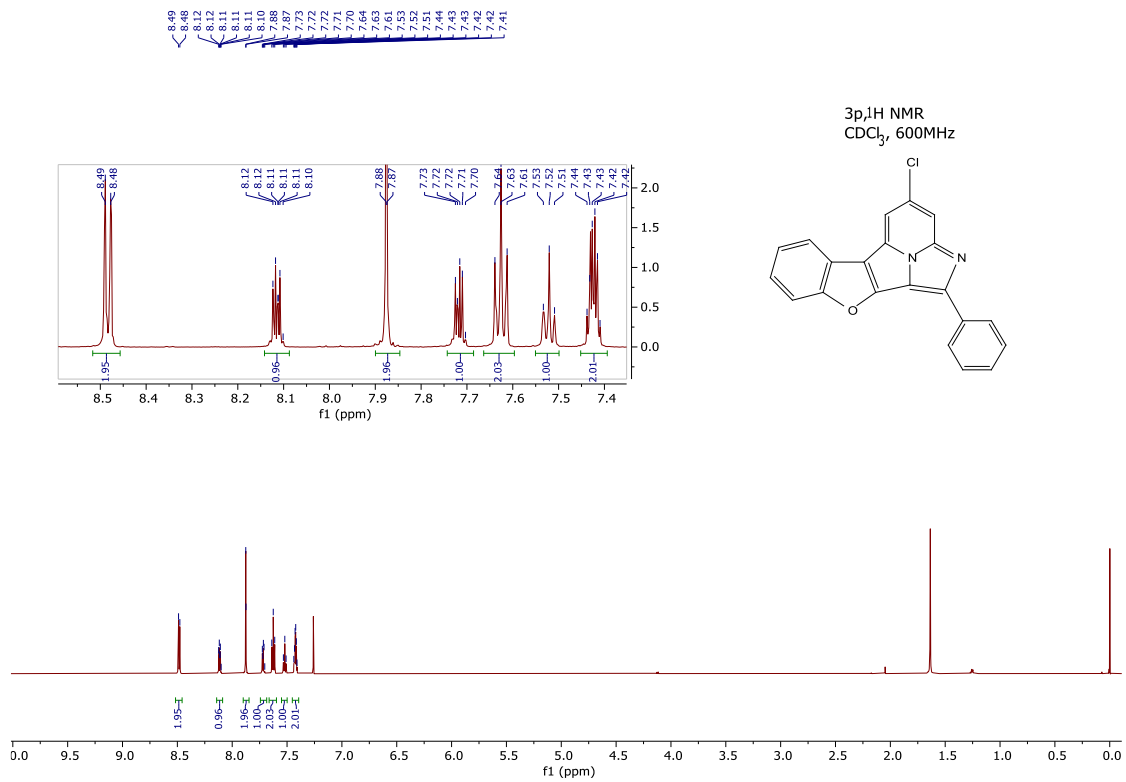

<sup>1</sup>H NMR of 3p

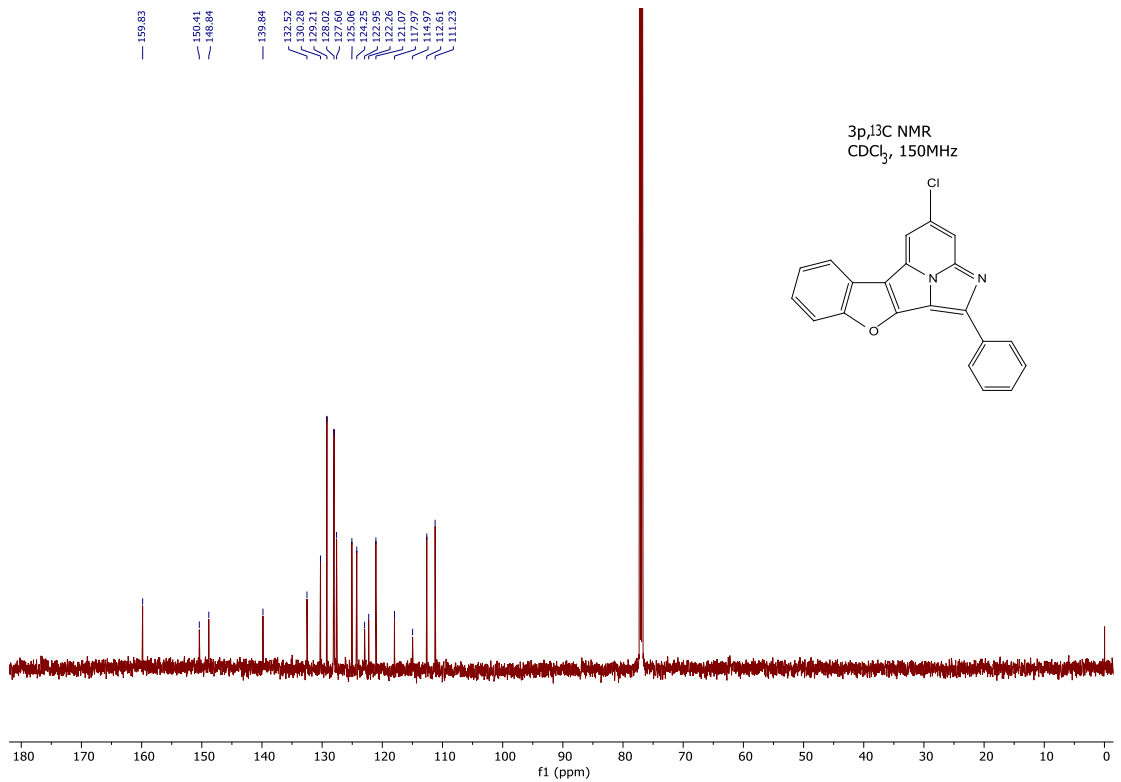

<sup>13</sup>C NMR of 3p

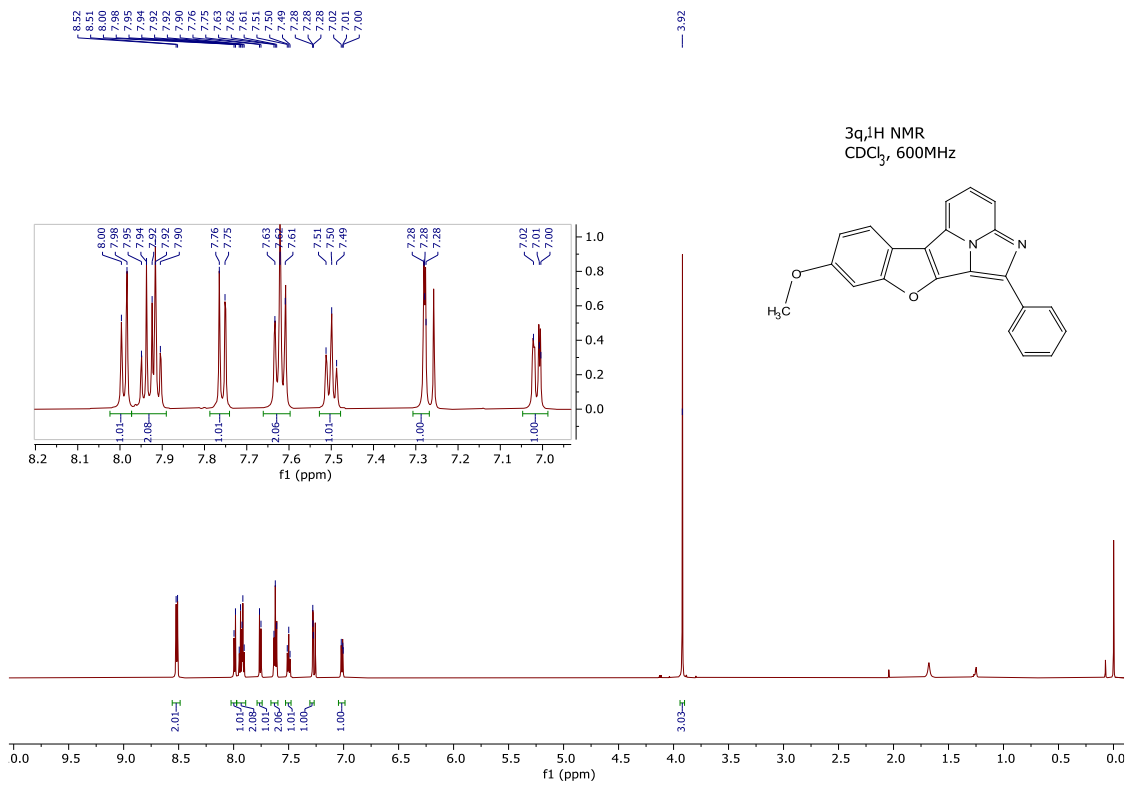

<sup>1</sup>H NMR of 3q

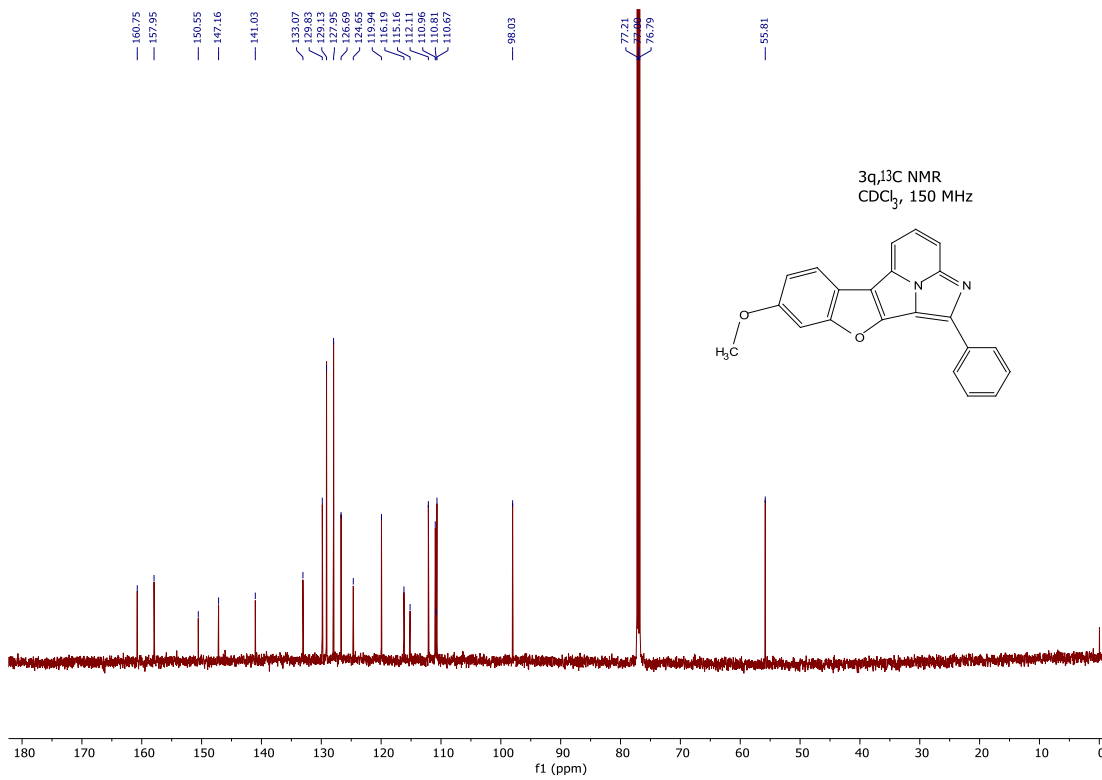

<sup>13</sup>C NMR of 3q

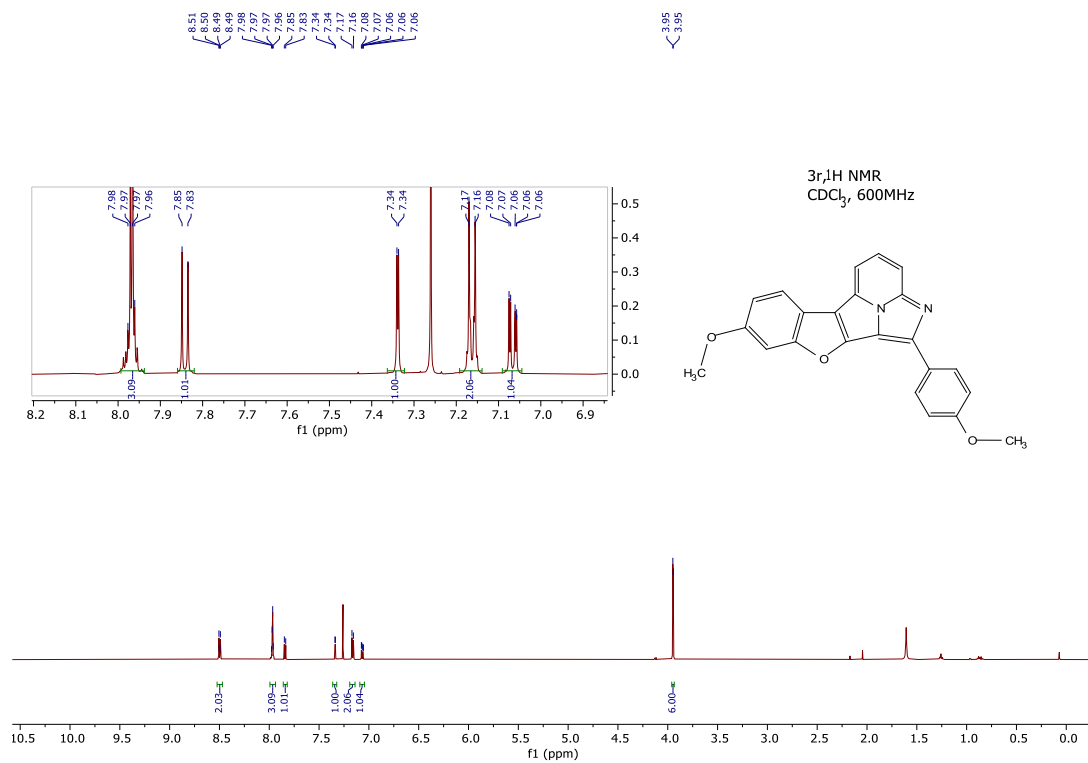

$^1\text{H}$  NMR of **3r**

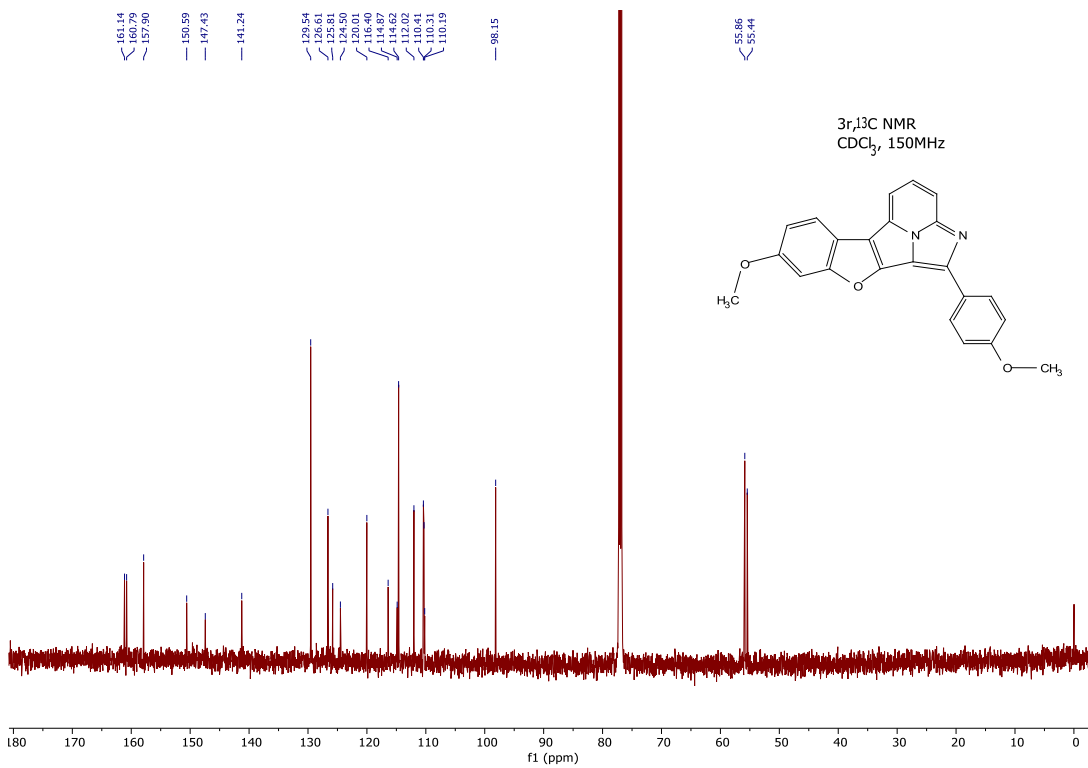

$^{13}\text{C}$  NMR of **3r**

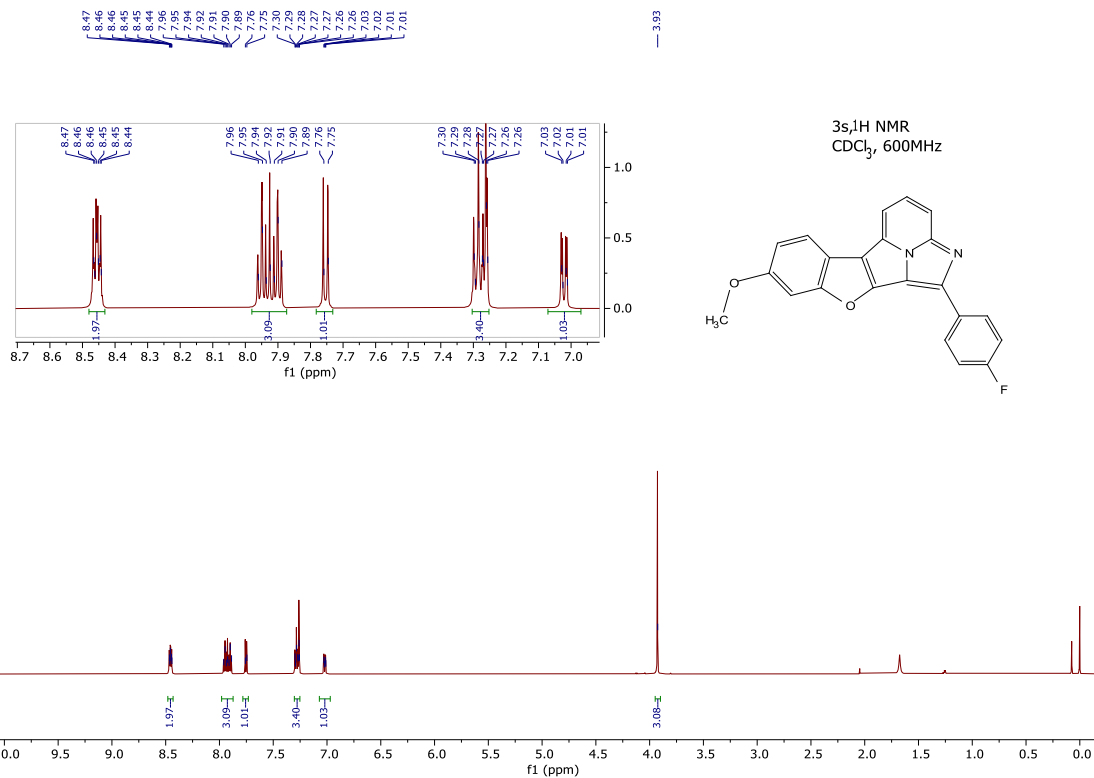

<sup>1</sup>H NMR of 3s

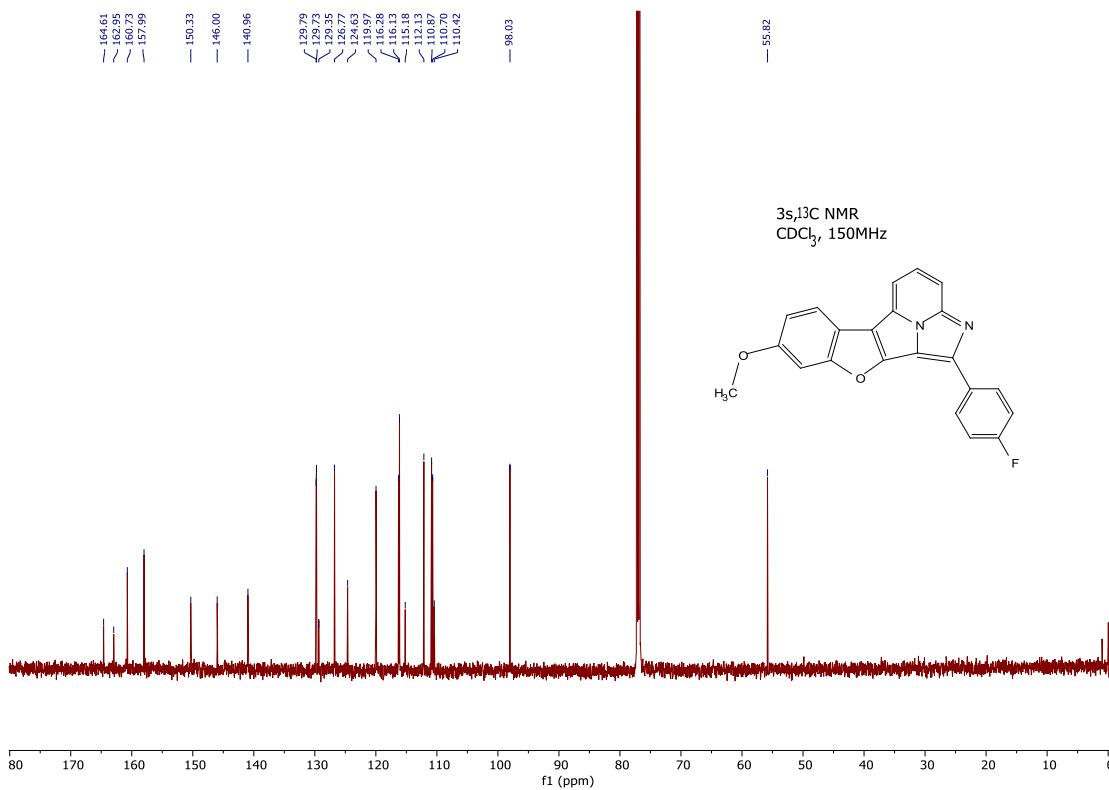

<sup>13</sup>C NMR of 3s

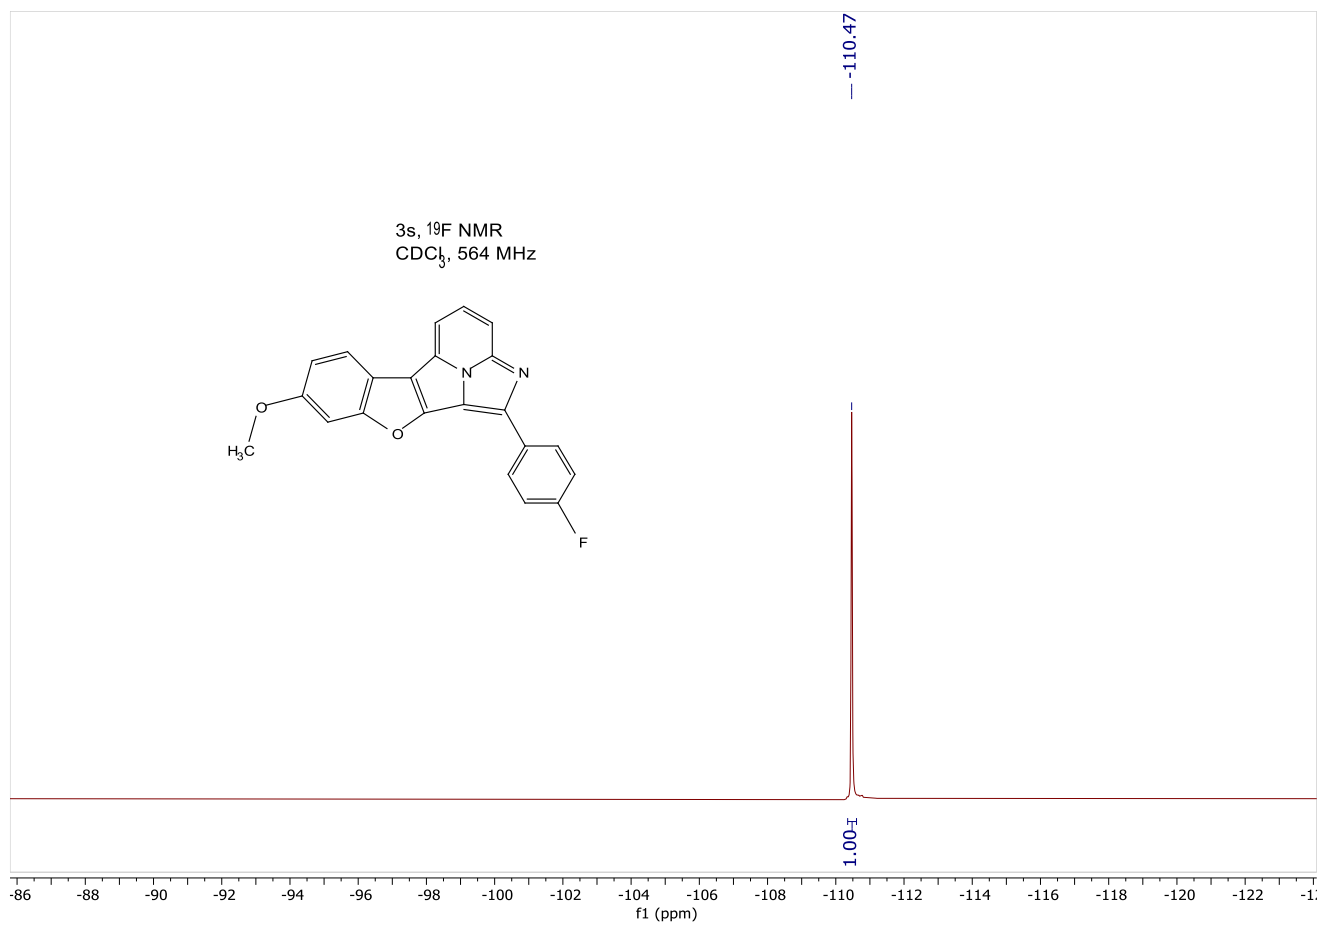

$^{19}\text{F}$  NMR of 3s

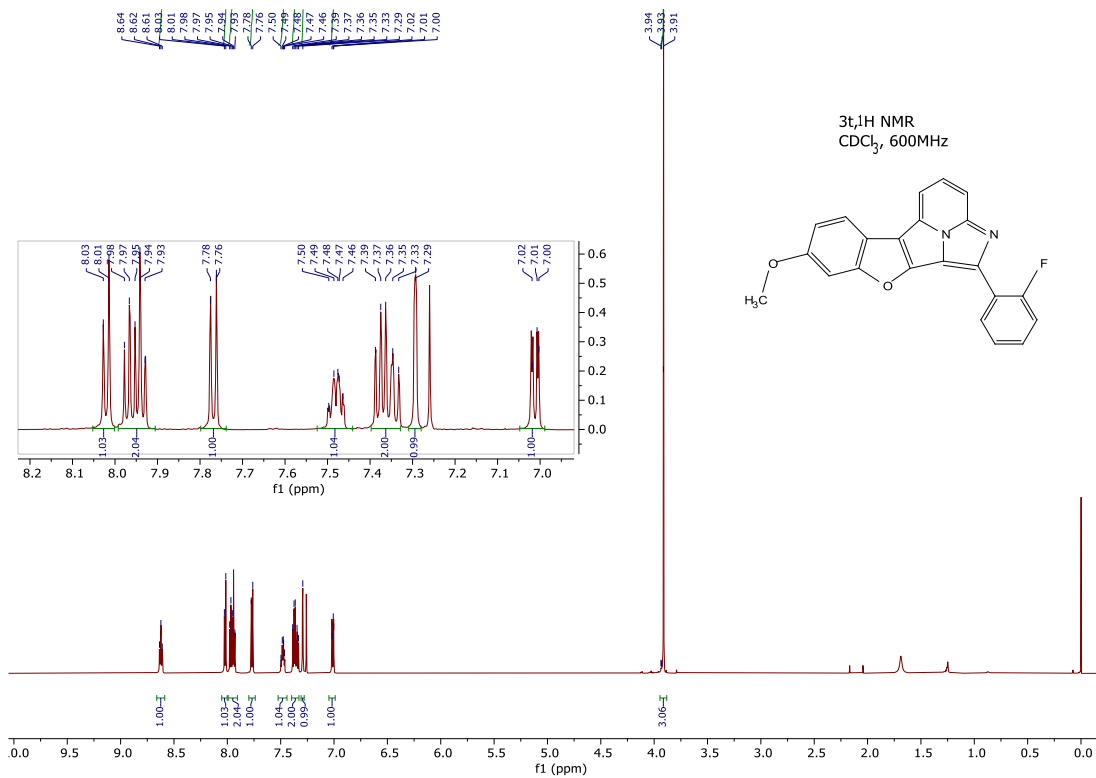

<sup>1</sup>H NMR of 3t

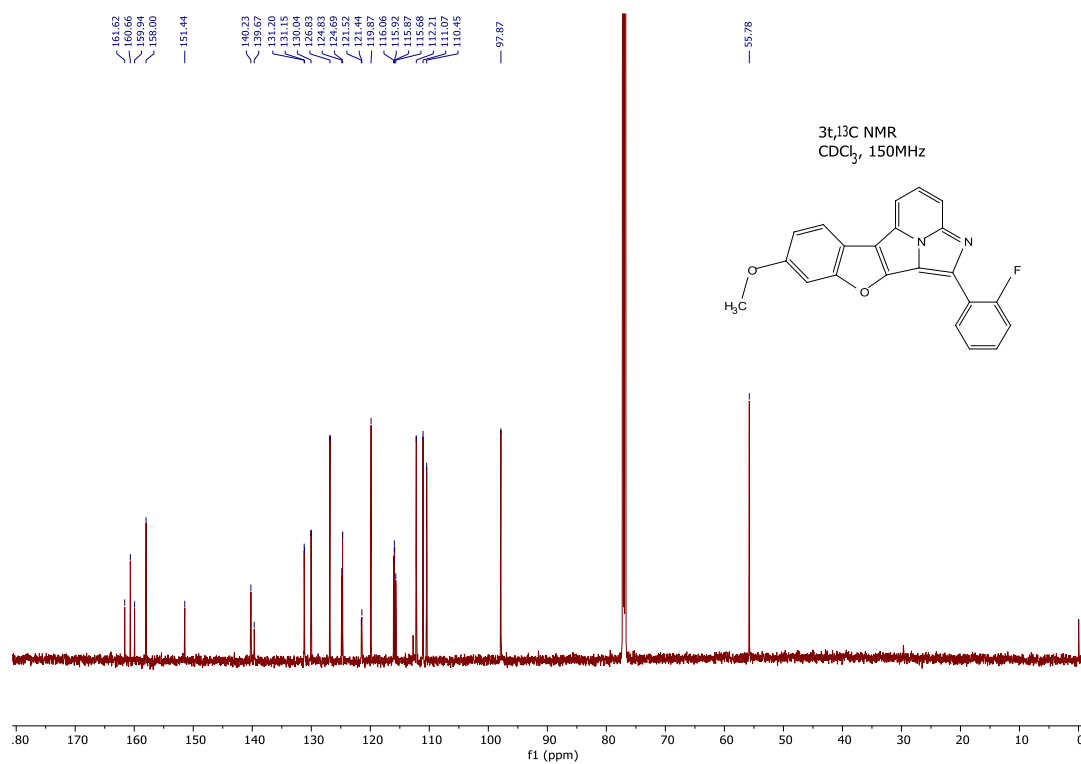

<sup>13</sup>C NMR of 3t

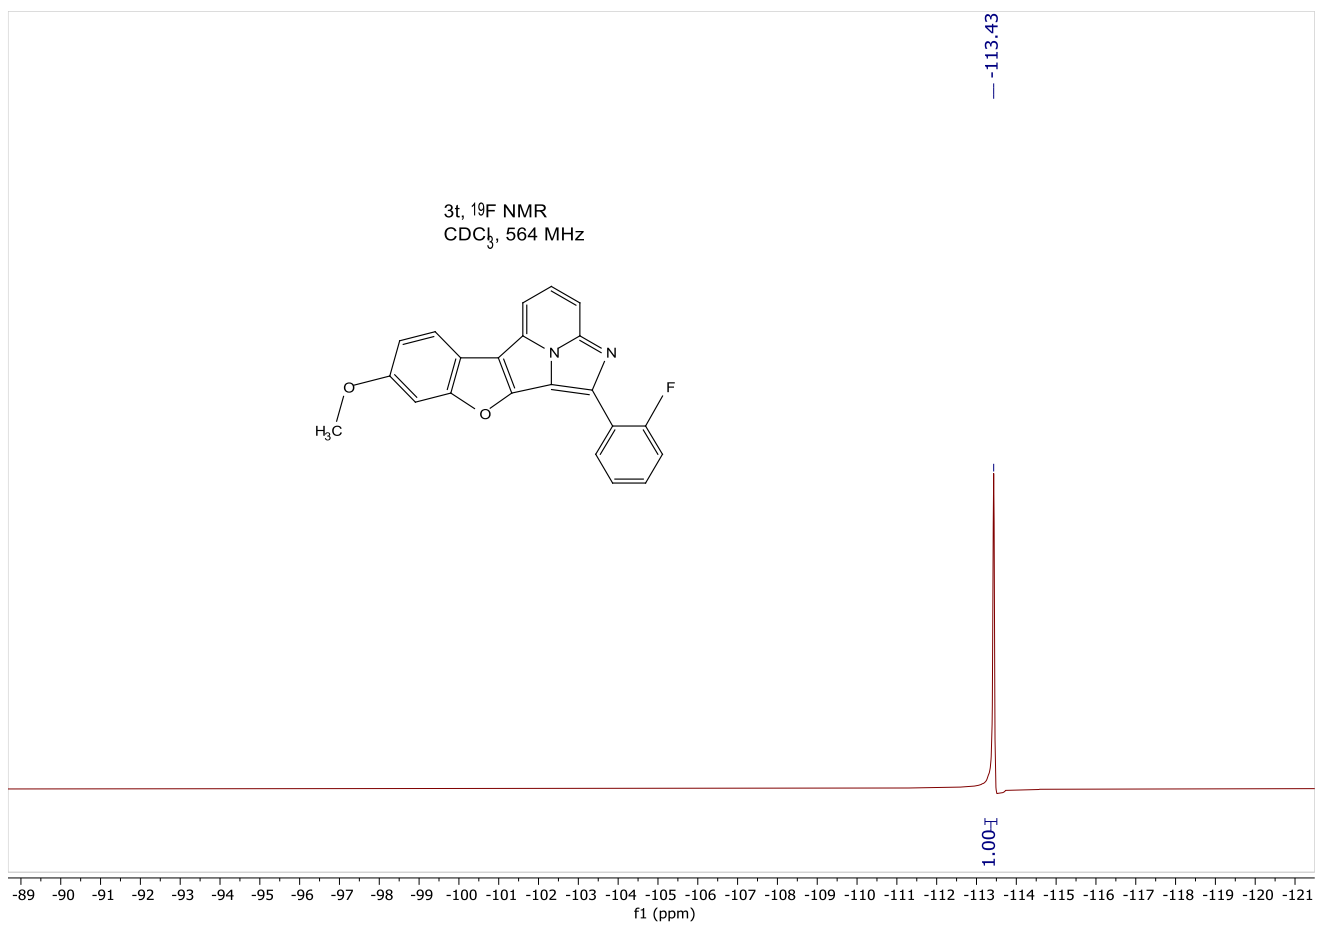

$^{19}\text{F}$  NMR of **3t**

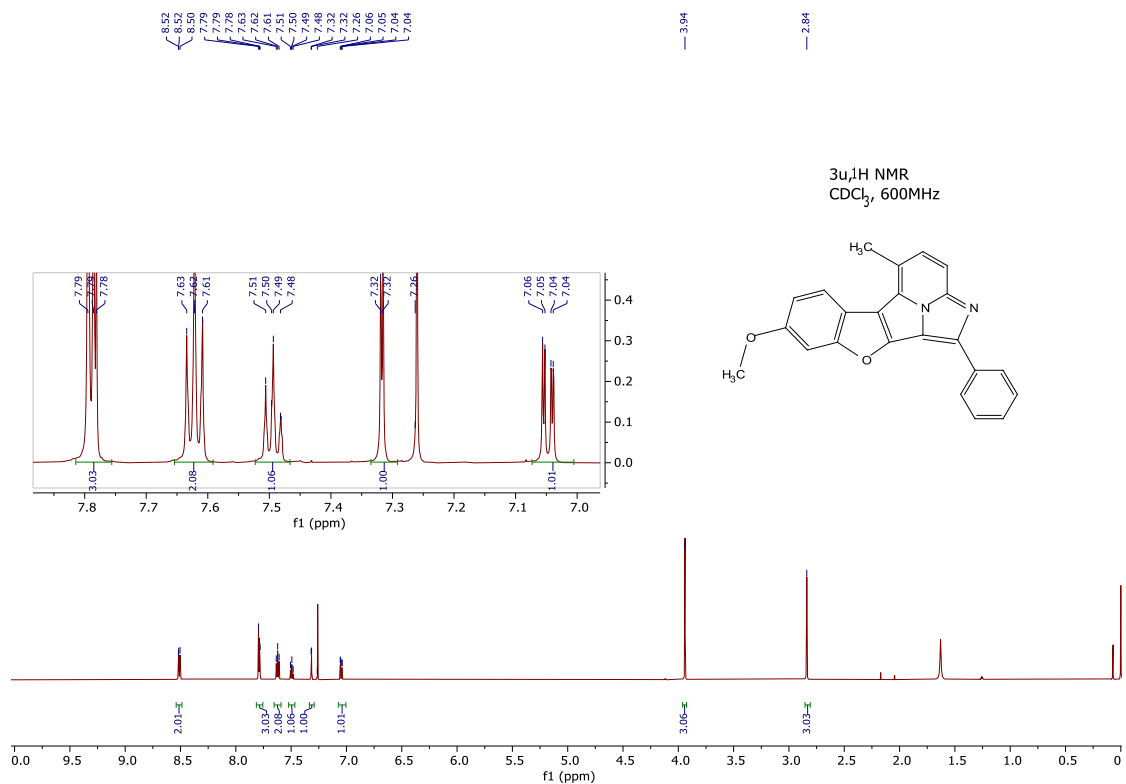

$^1\text{H NMR}$  of **3u**

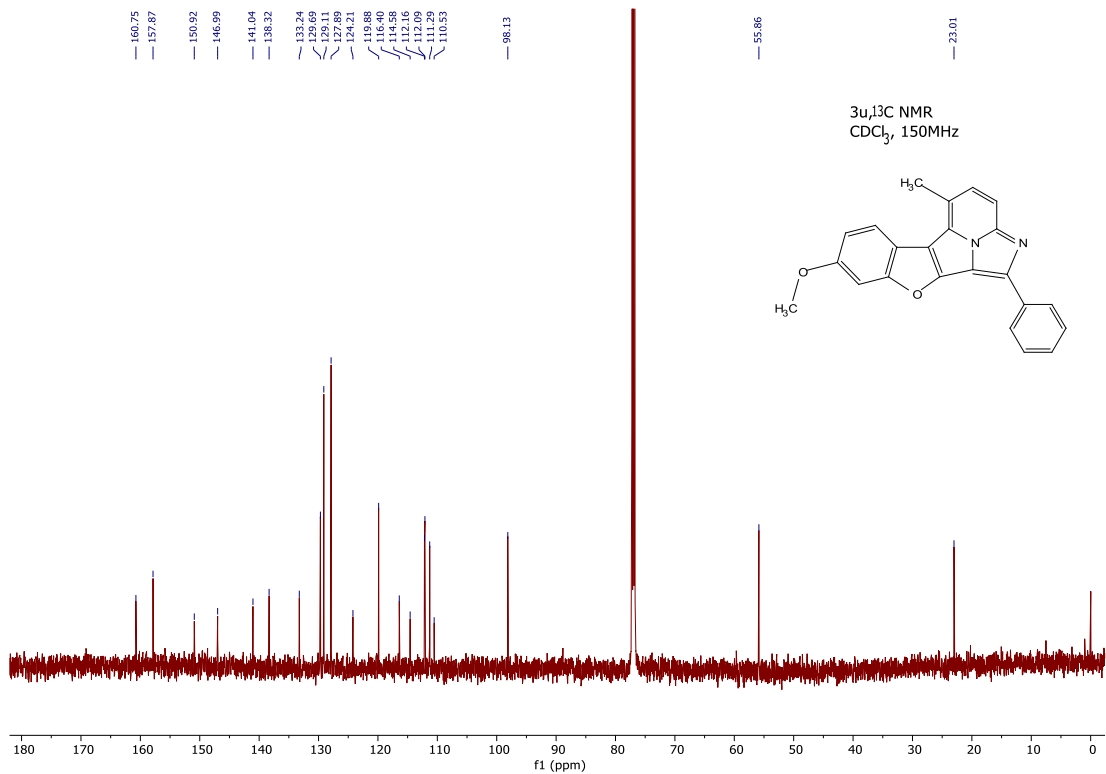

$^{13}\text{C NMR}$  of **3u**



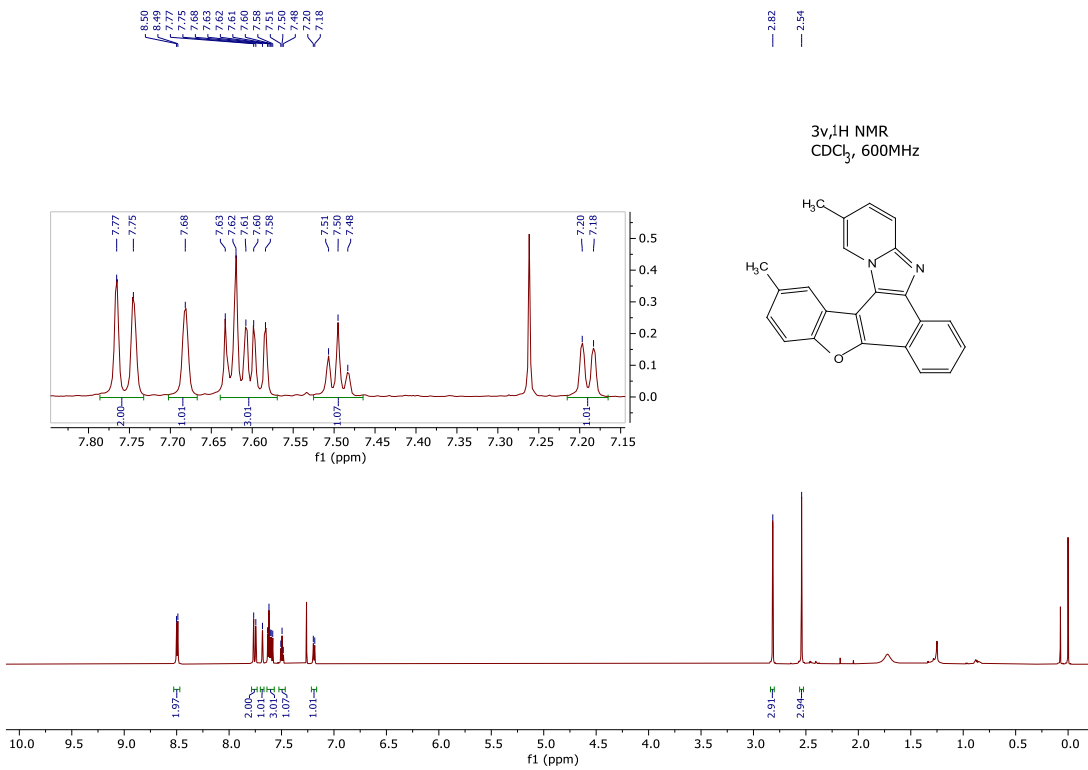

<sup>1</sup>H NMR of 3v

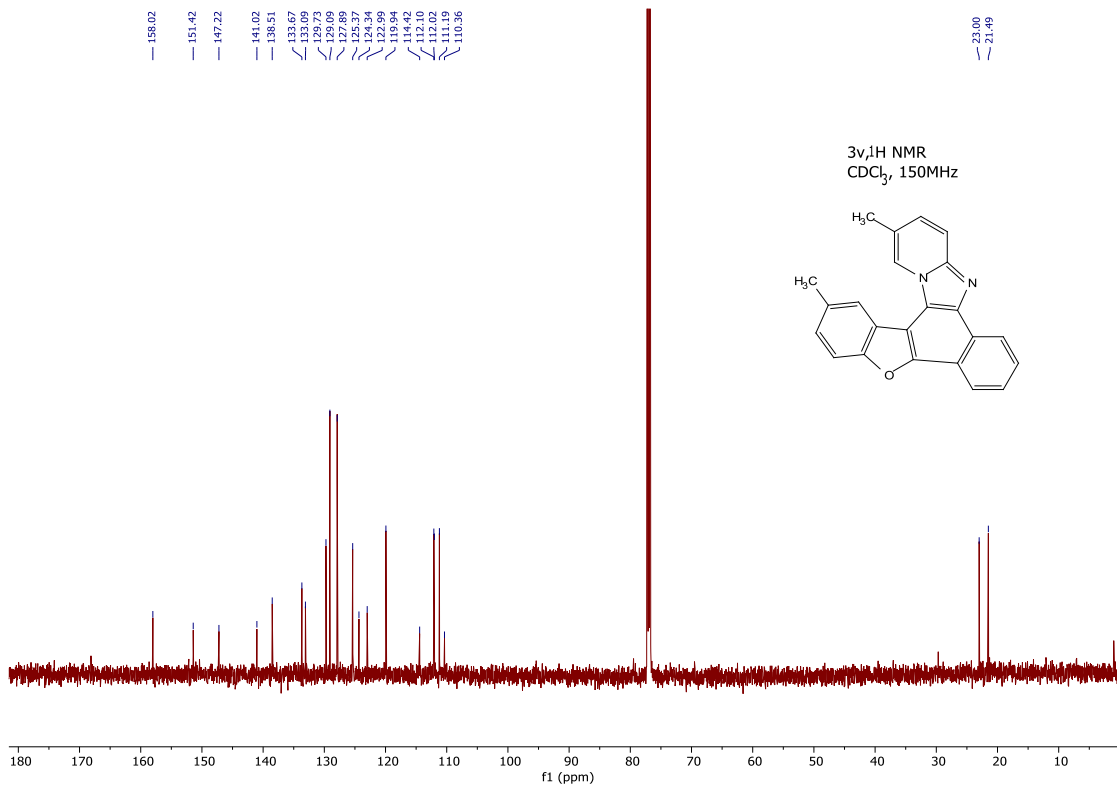

<sup>13</sup>C NMR of 3v

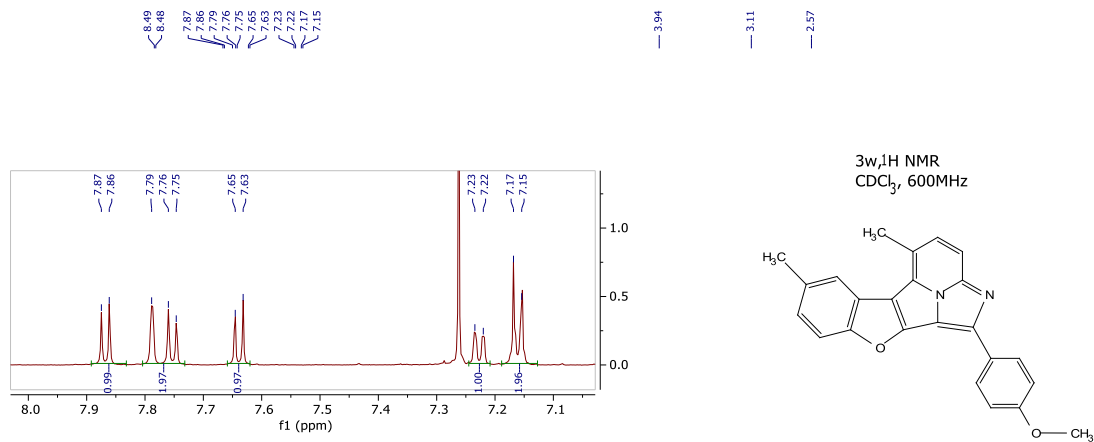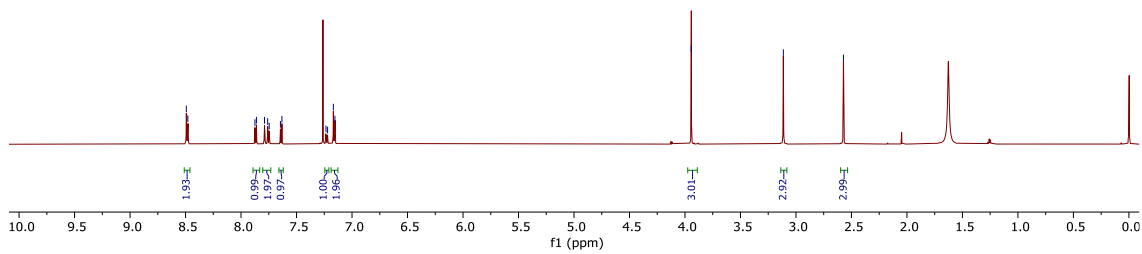

<sup>1</sup>H NMR of 3w

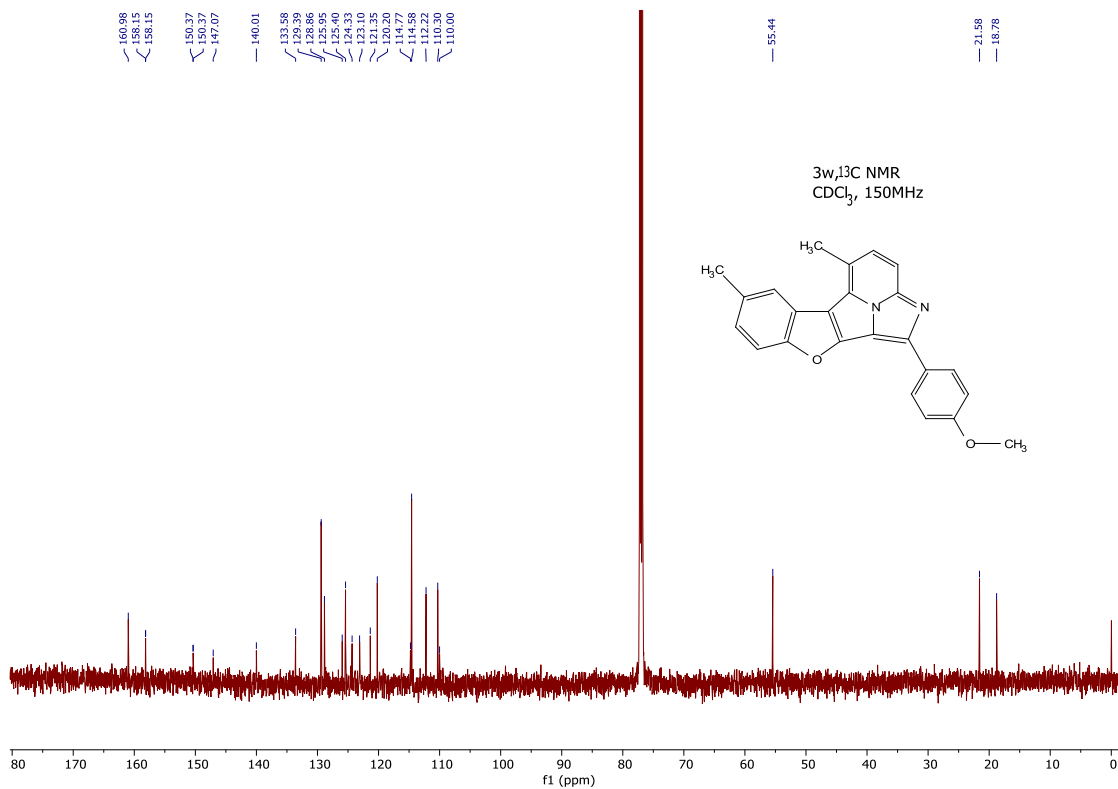

<sup>13</sup>C NMR of 3w

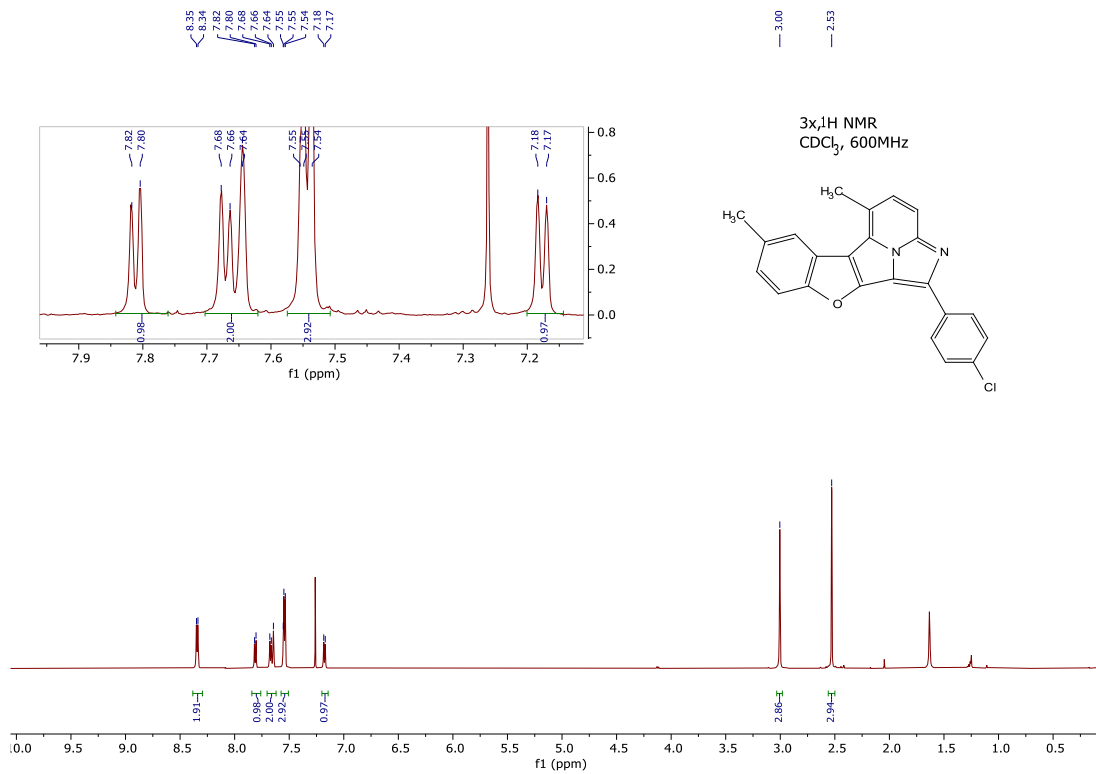

**<sup>1</sup>H NMR of 3x**

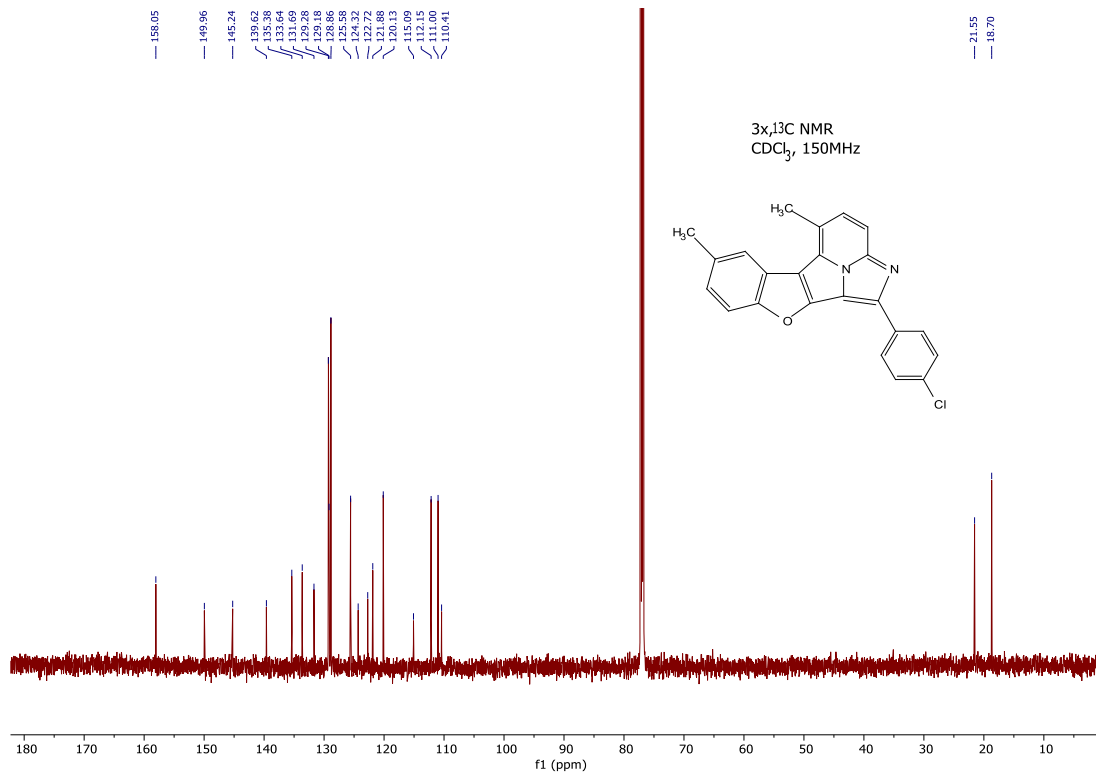

**<sup>13</sup>C NMR of 3x**

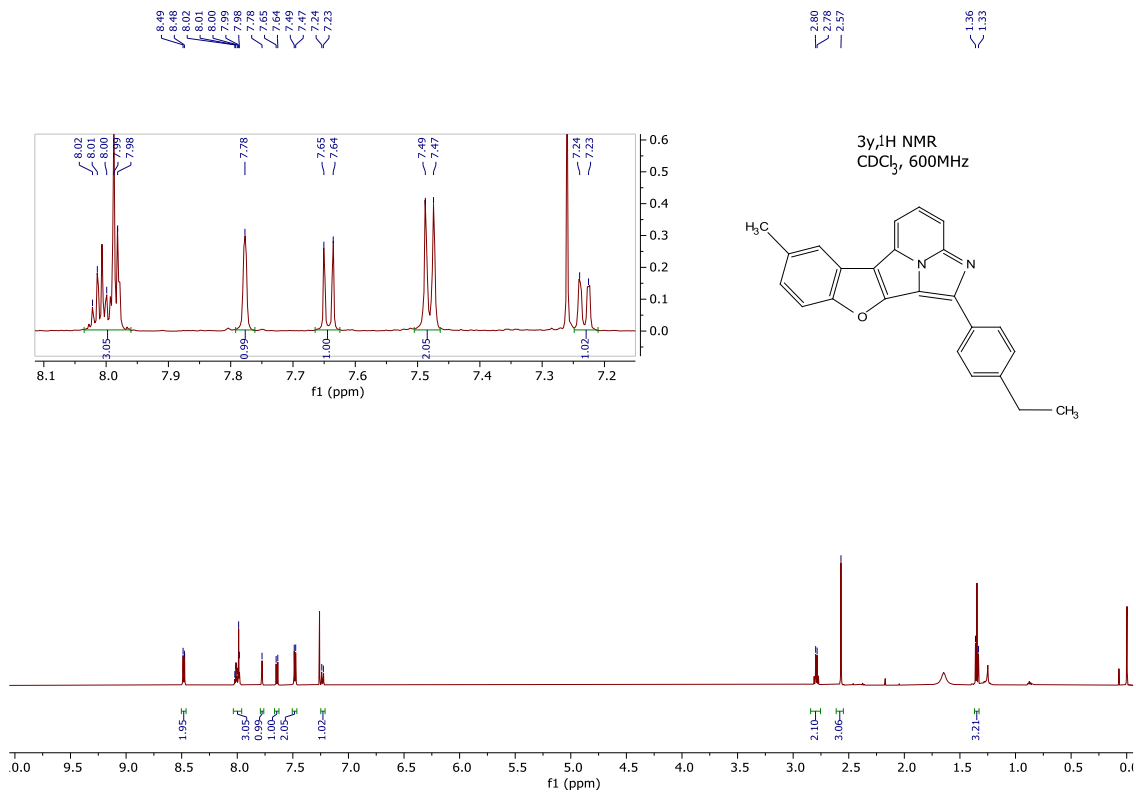

**<sup>1</sup>H NMR of 3y**

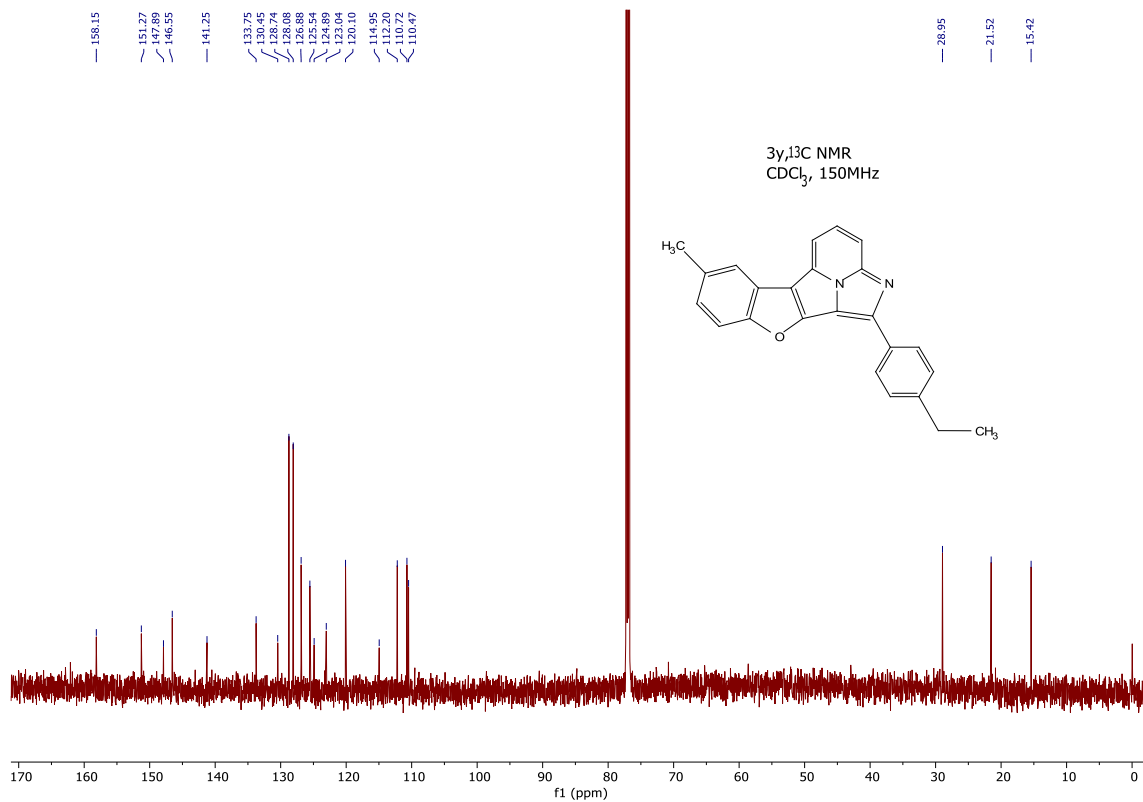

**<sup>13</sup>C NMR of 3y**

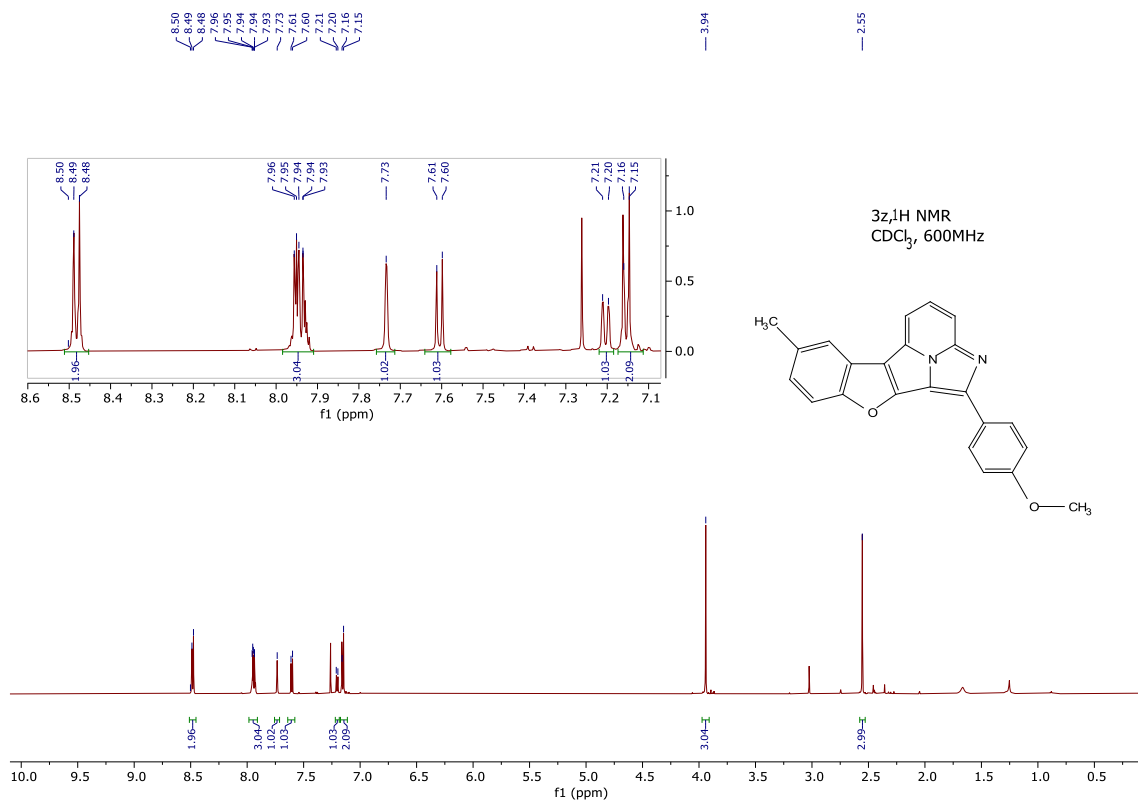

<sup>1</sup>H NMR of 3z

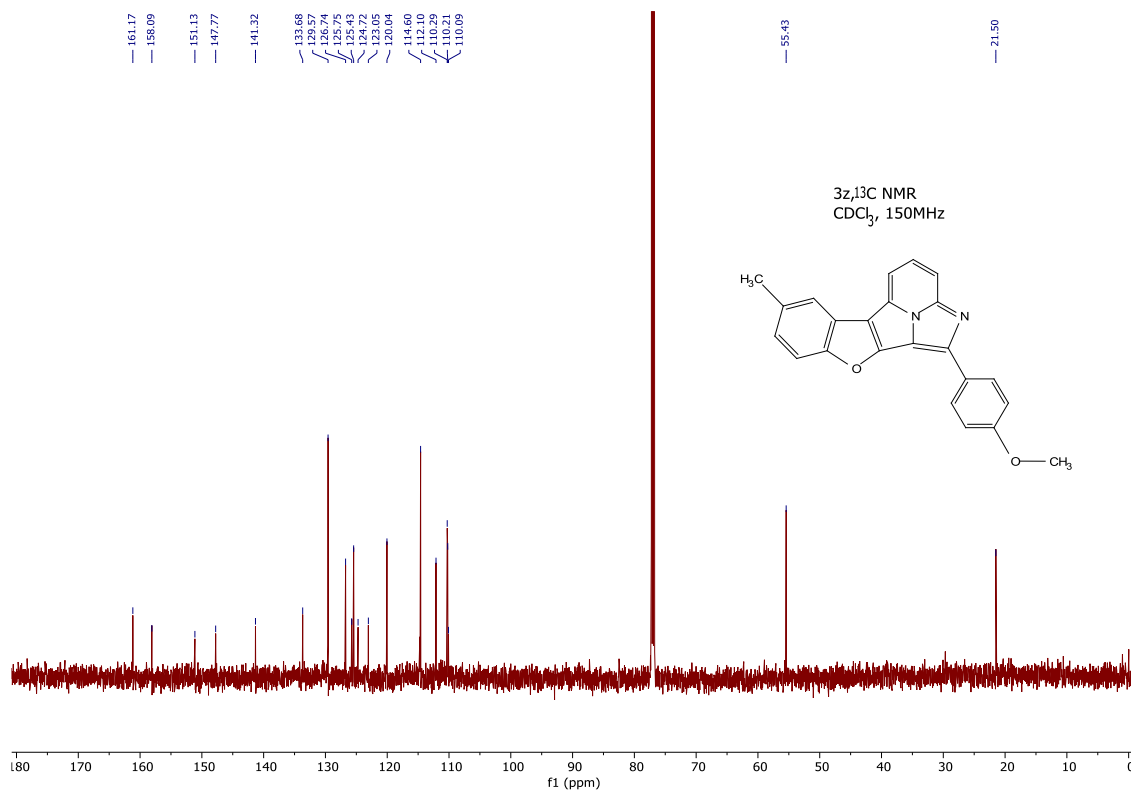

<sup>13</sup>C NMR of 3z

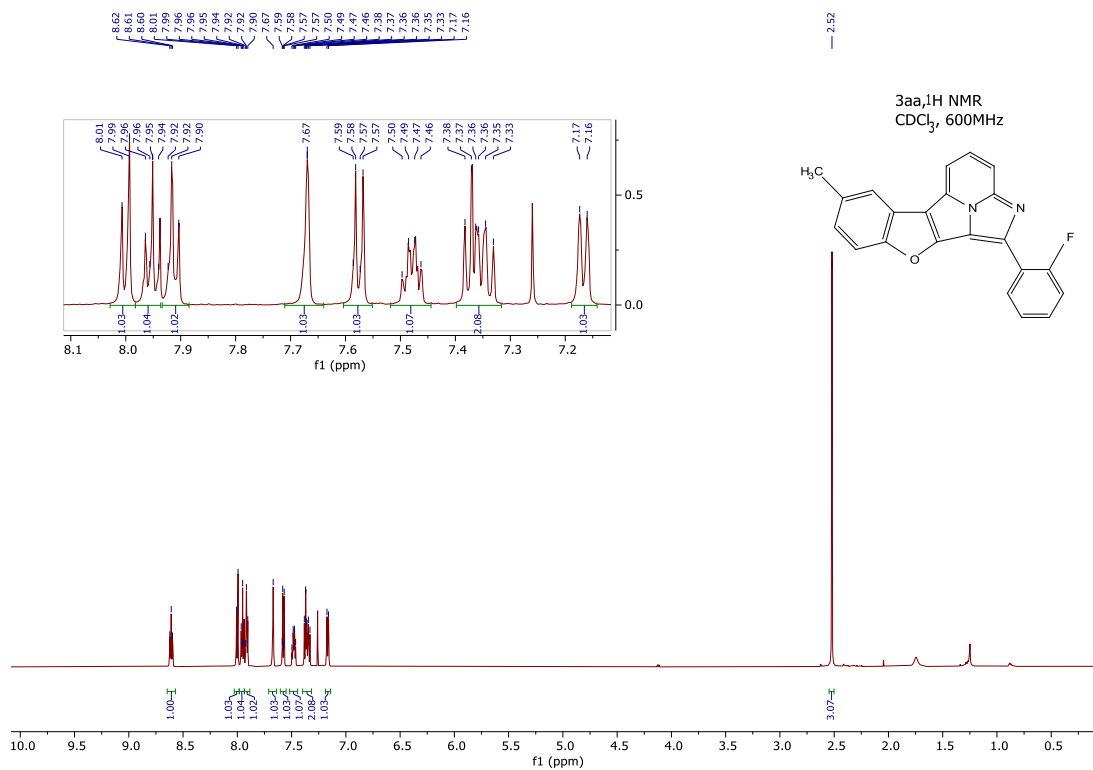

$^1\text{H}$  NMR of 3aa

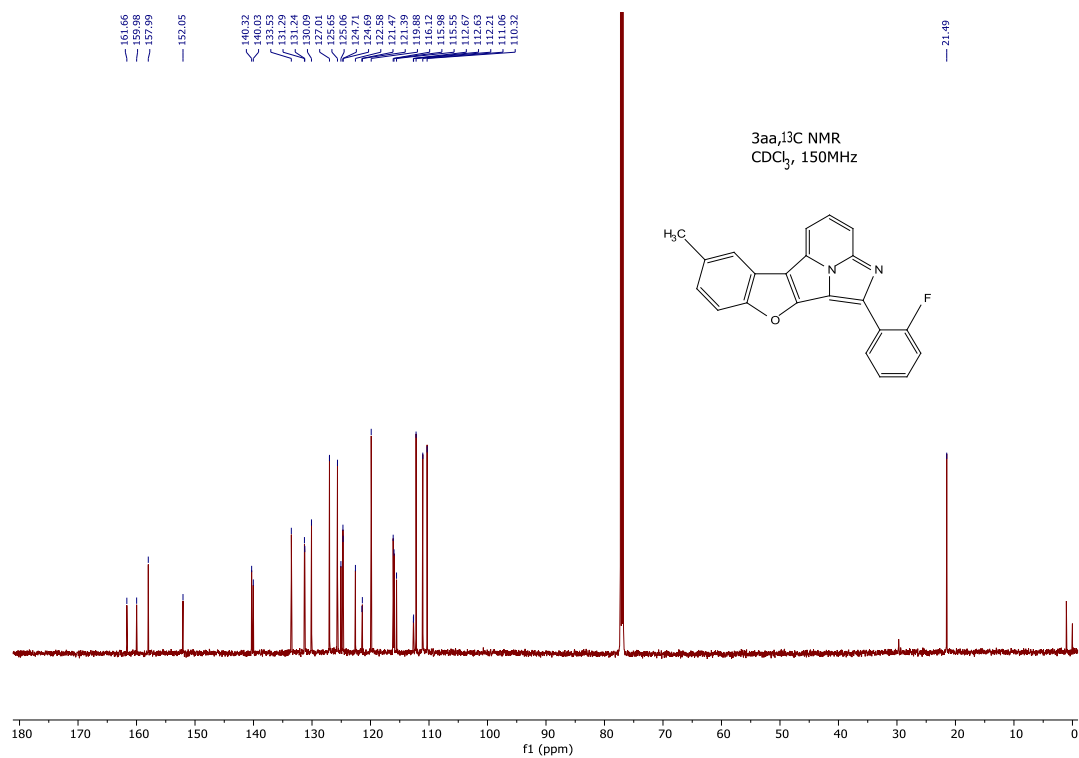

$^{13}\text{C}$  NMR of 3aa

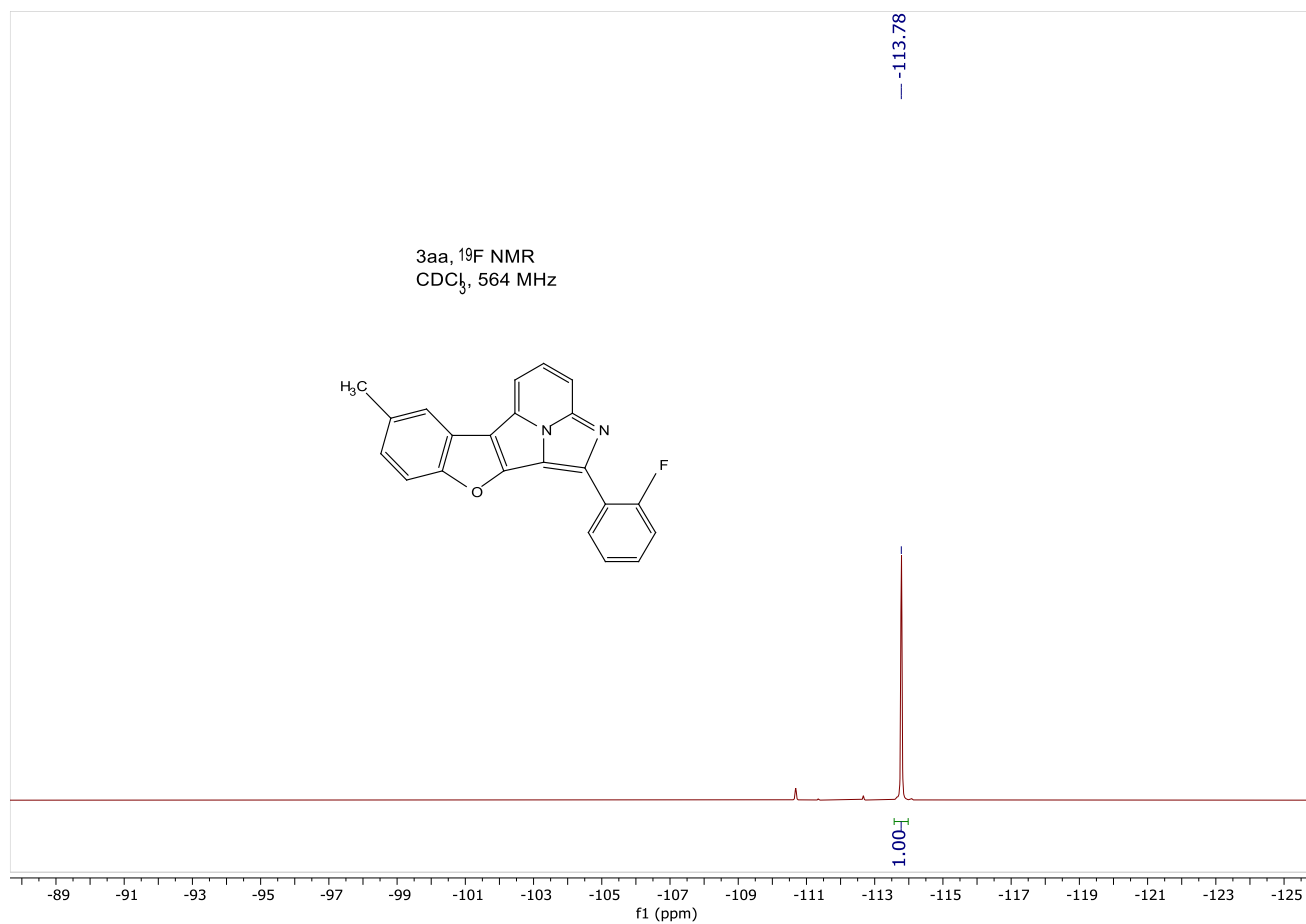

$^{19}\text{F}$  NMR of **3aa**

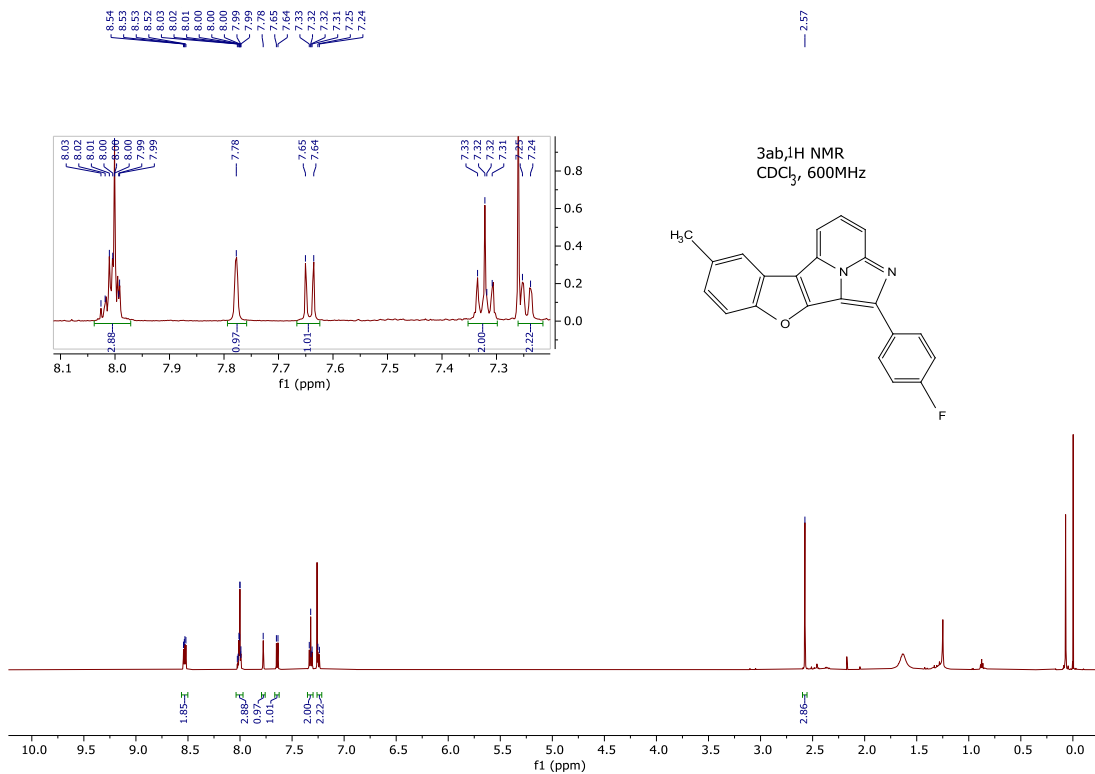

<sup>1</sup>H NMR of 3ab

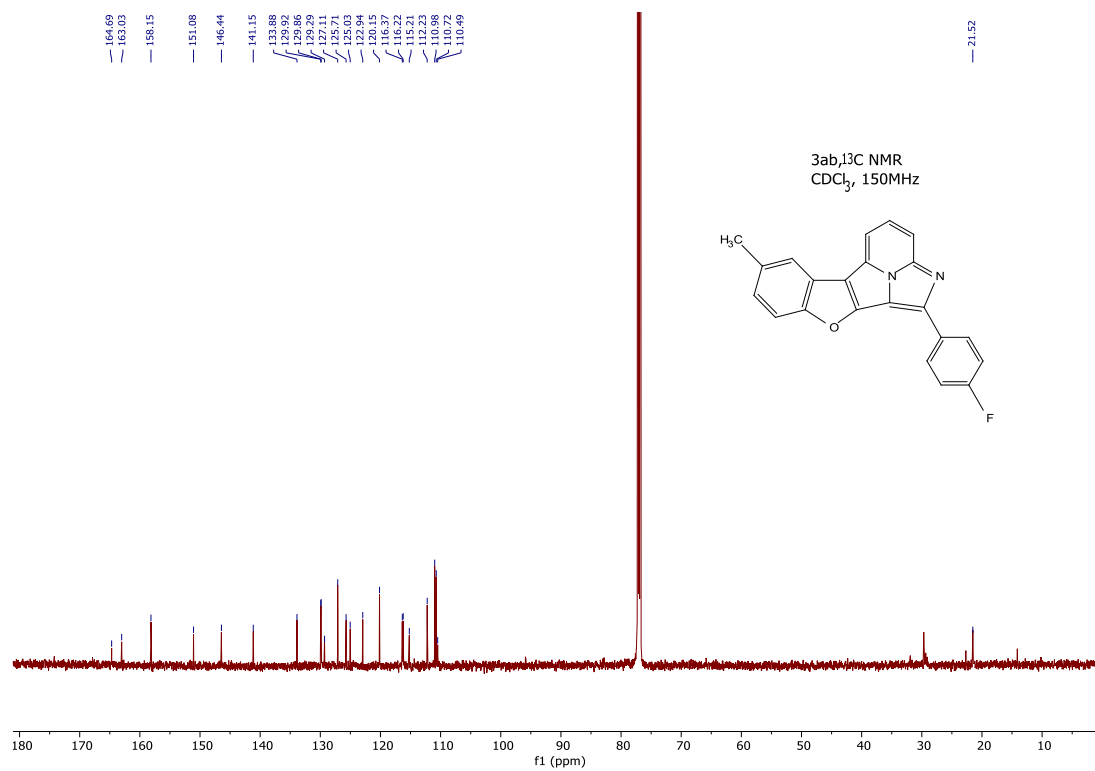

<sup>13</sup>C NMR of 3ab



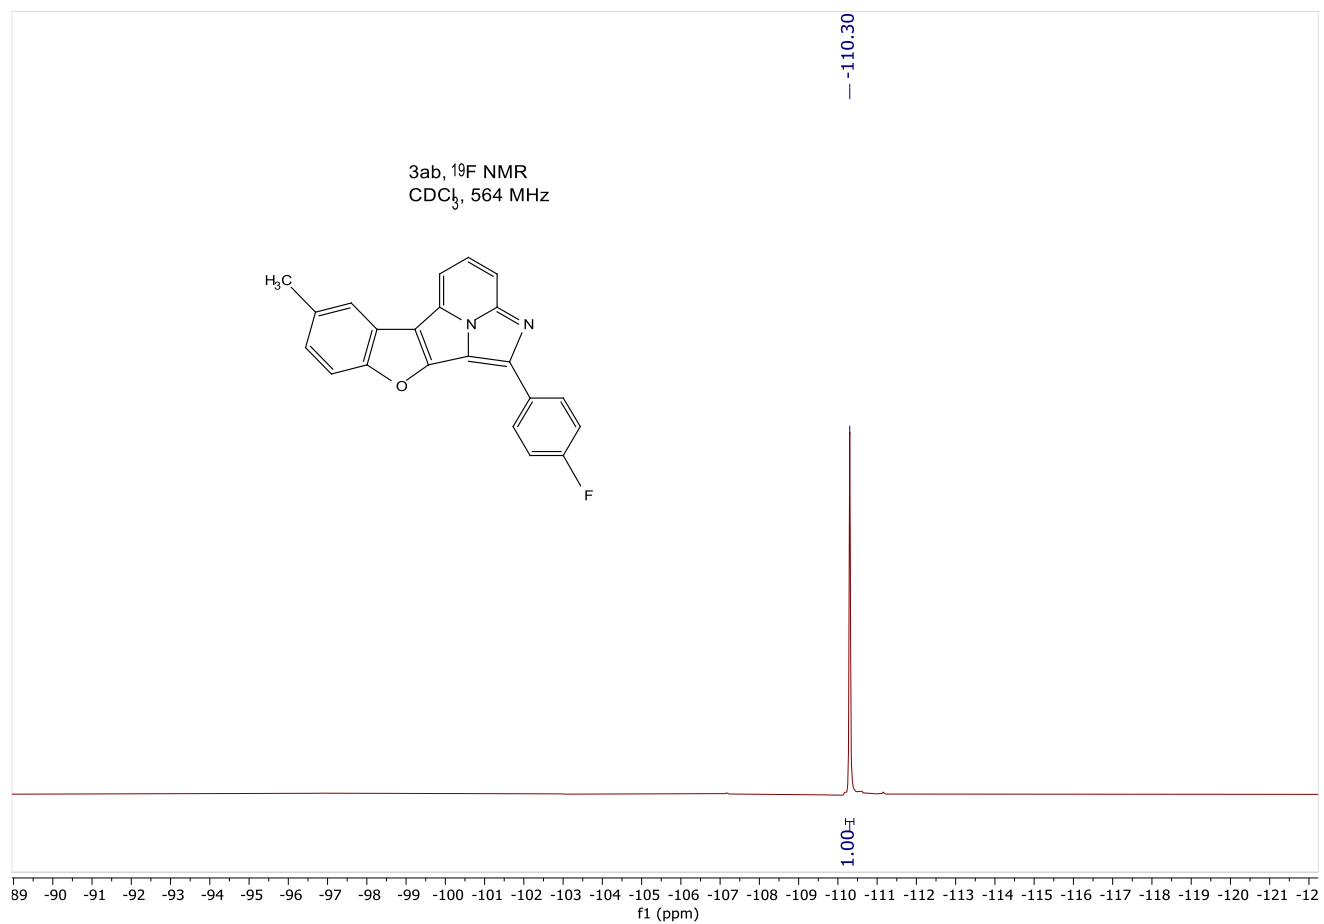

$^{19}\text{F}$  NMR of **3ab**

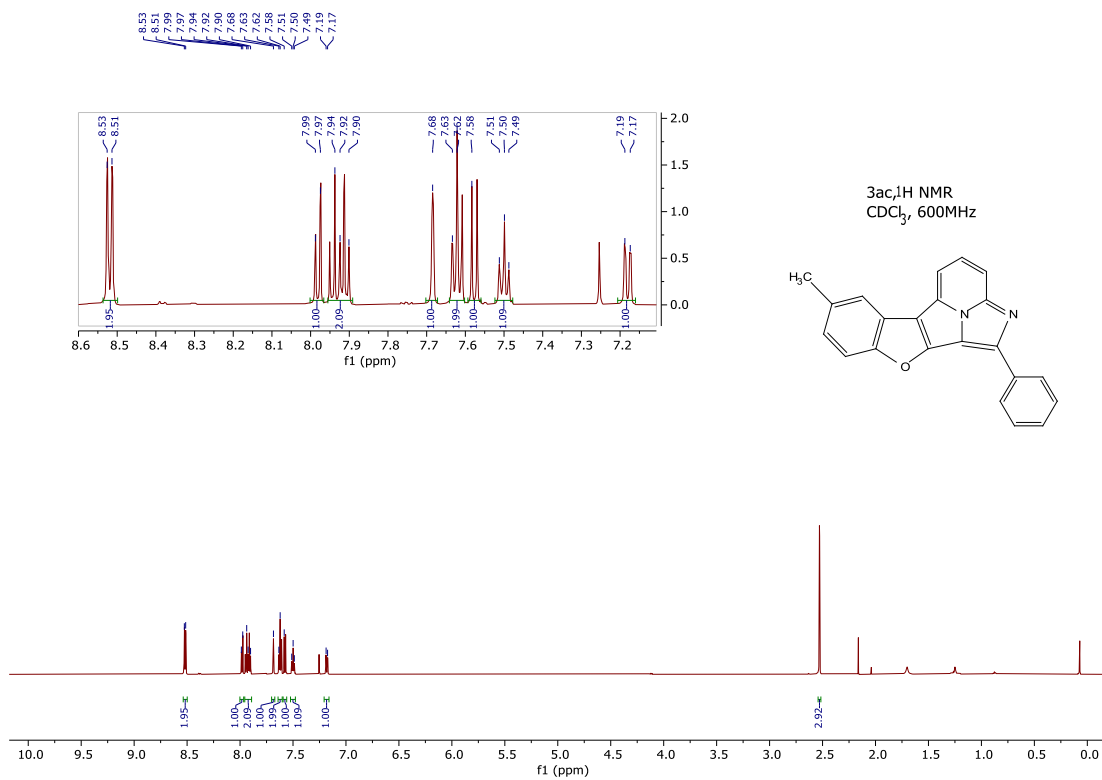

<sup>1</sup>H NMR of **3ac**

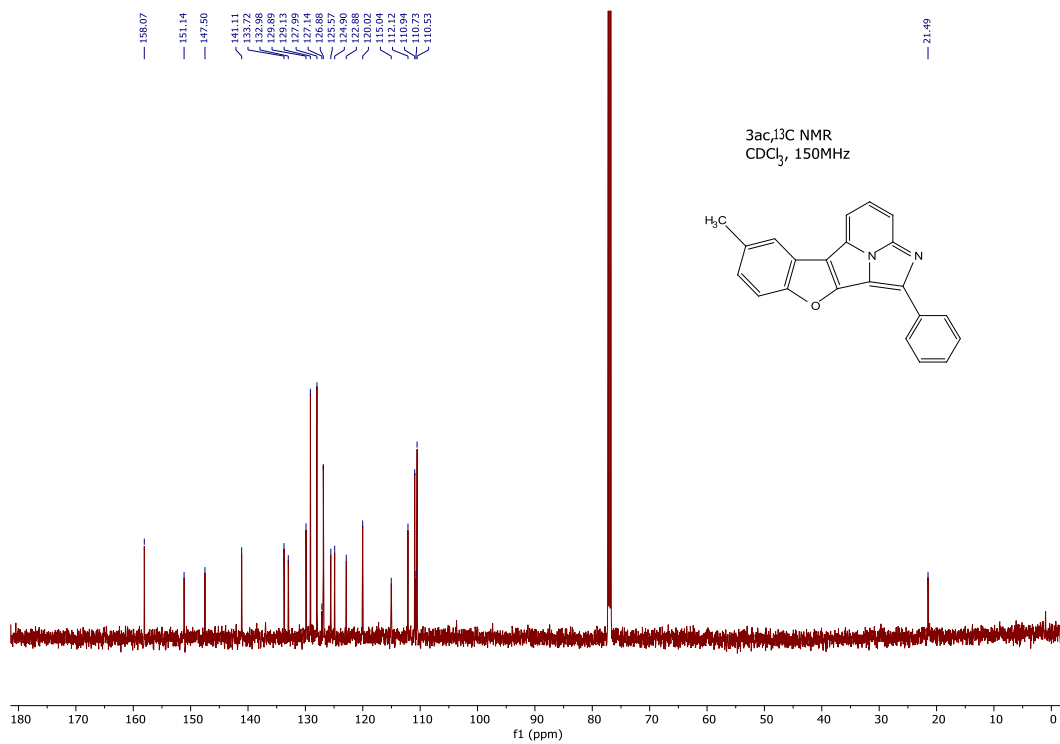

<sup>13</sup>C NMR of **3ac**

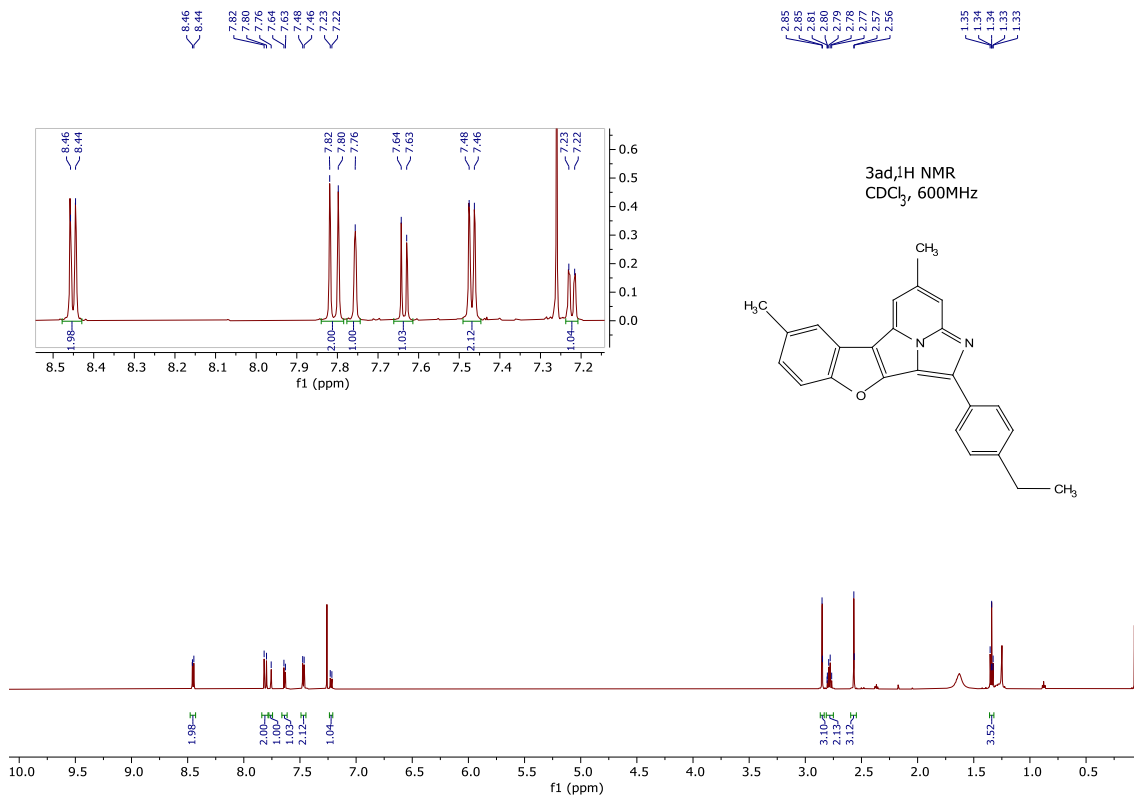

<sup>1</sup>H NMR of 3ad

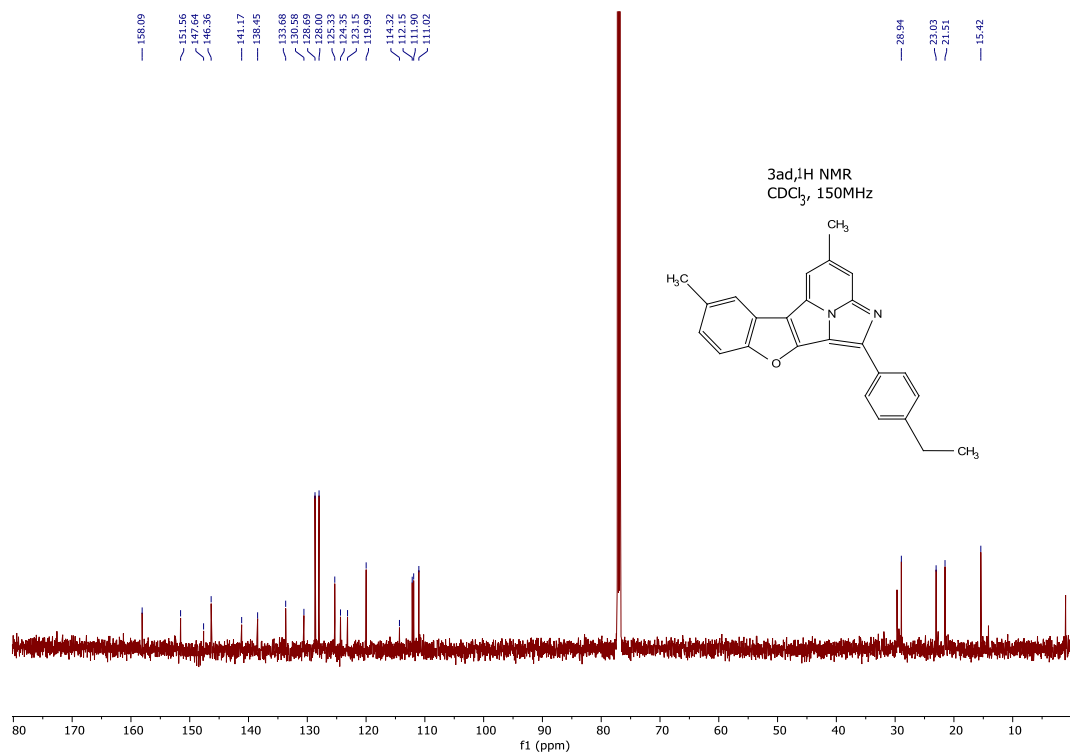

<sup>13</sup>C NMR of 3ad

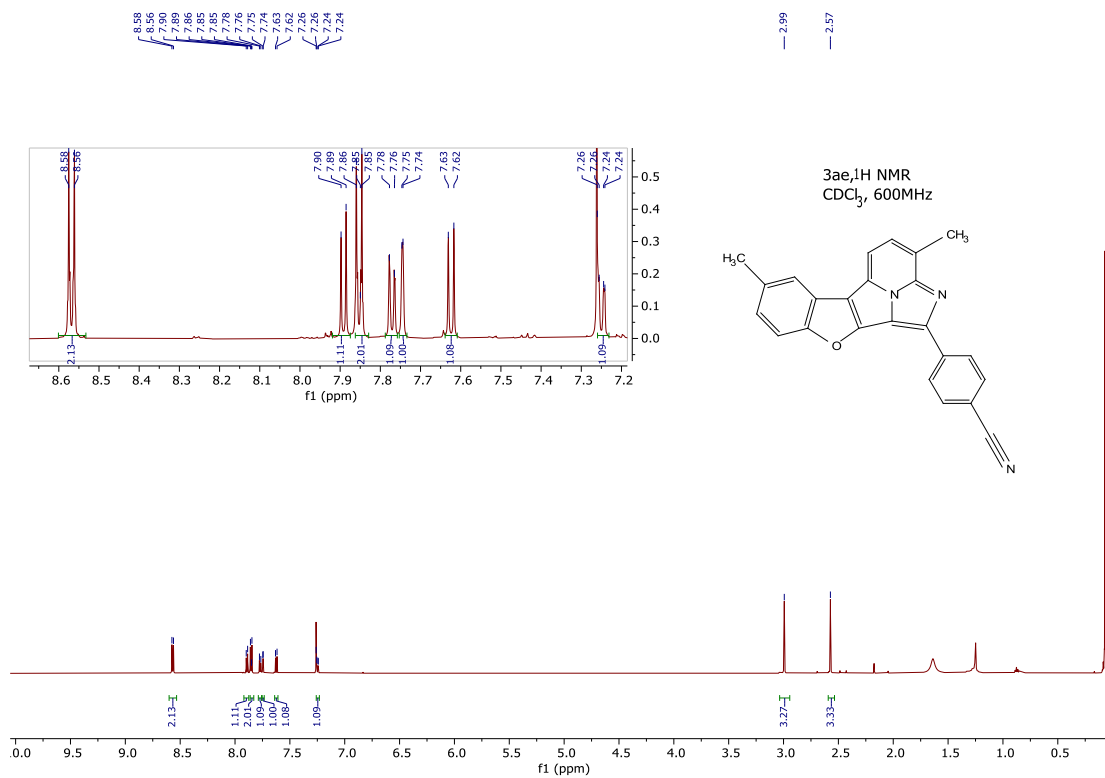

<sup>1</sup>H NMR of 3ae

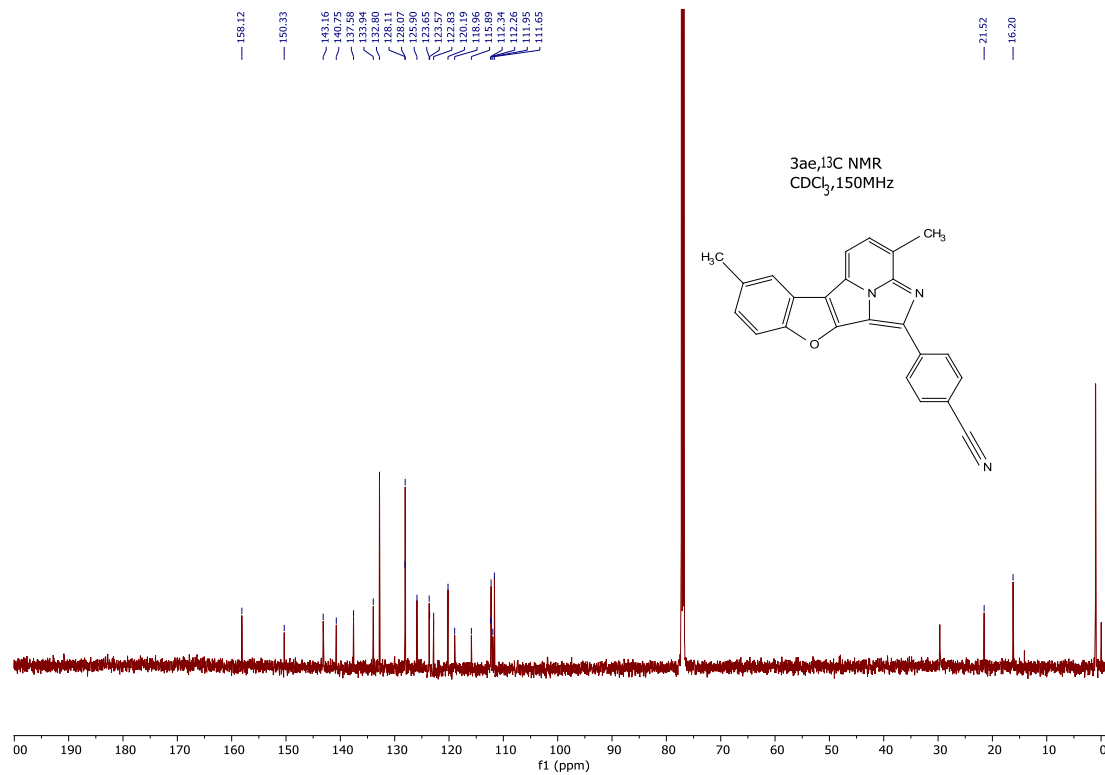

<sup>13</sup>C NMR of 3ae

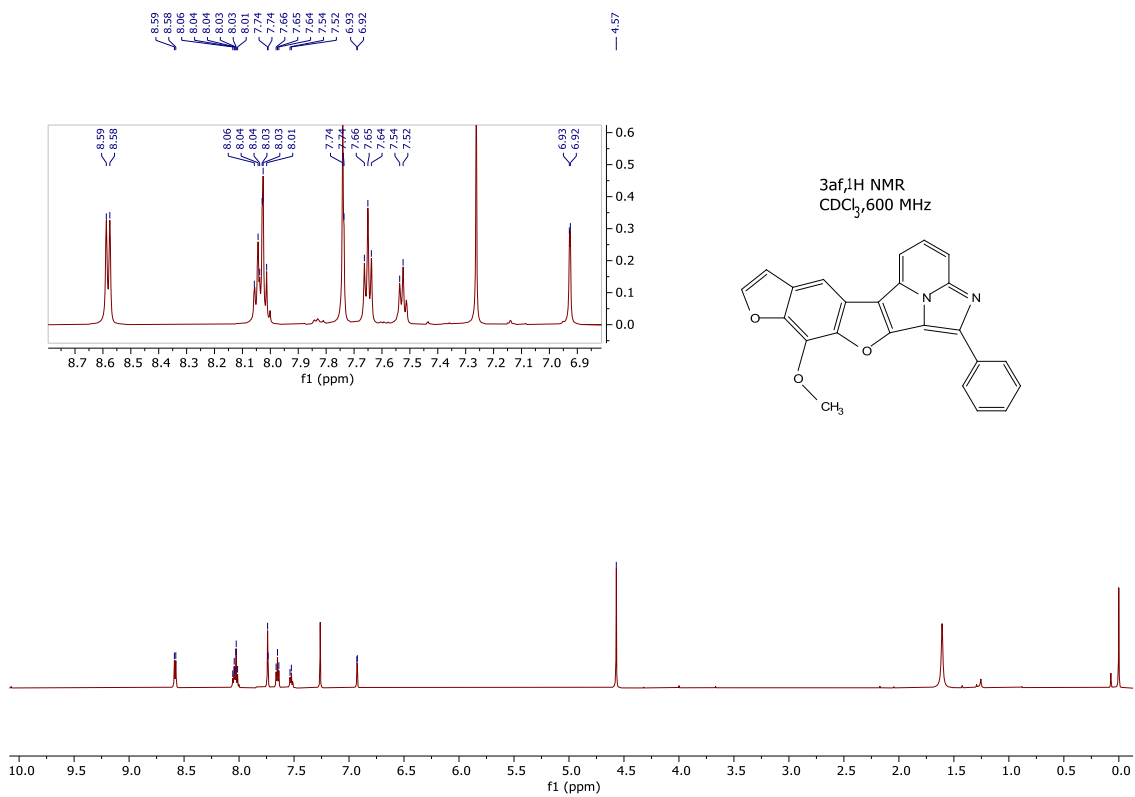

$^1\text{H}$  NMR of 3af

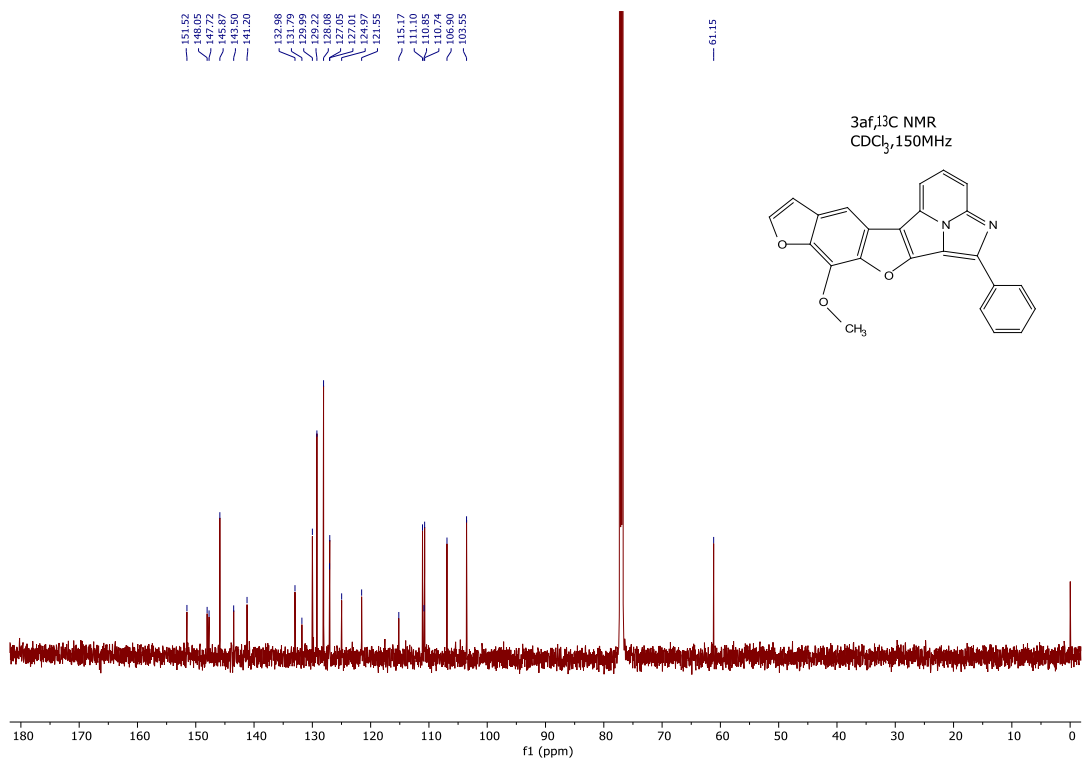

$^{13}\text{C}$  NMR of 3af

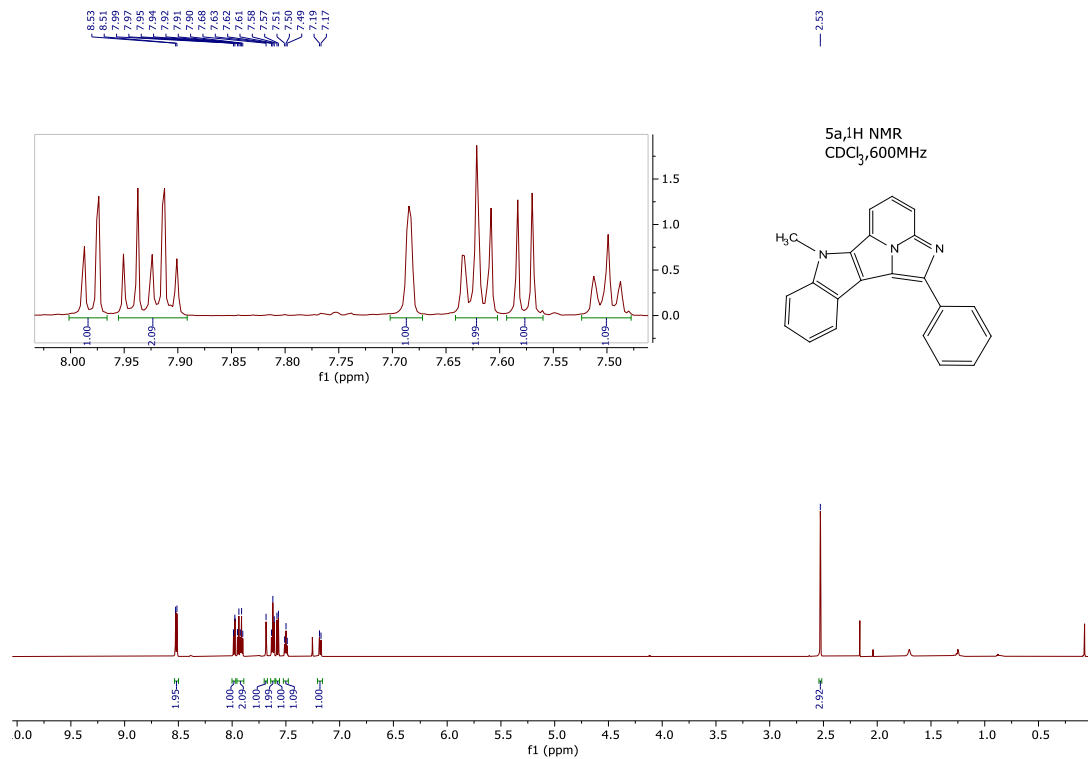

<sup>1</sup>H NMR of **5a**

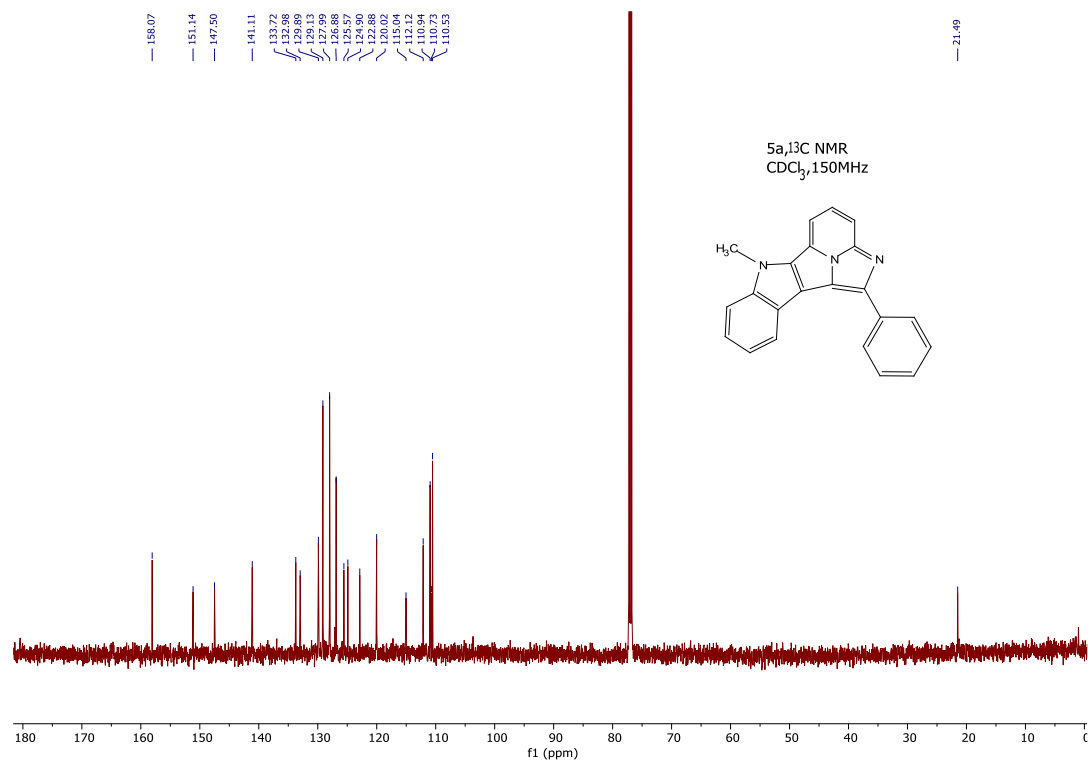

<sup>13</sup>C NMR of **5a**

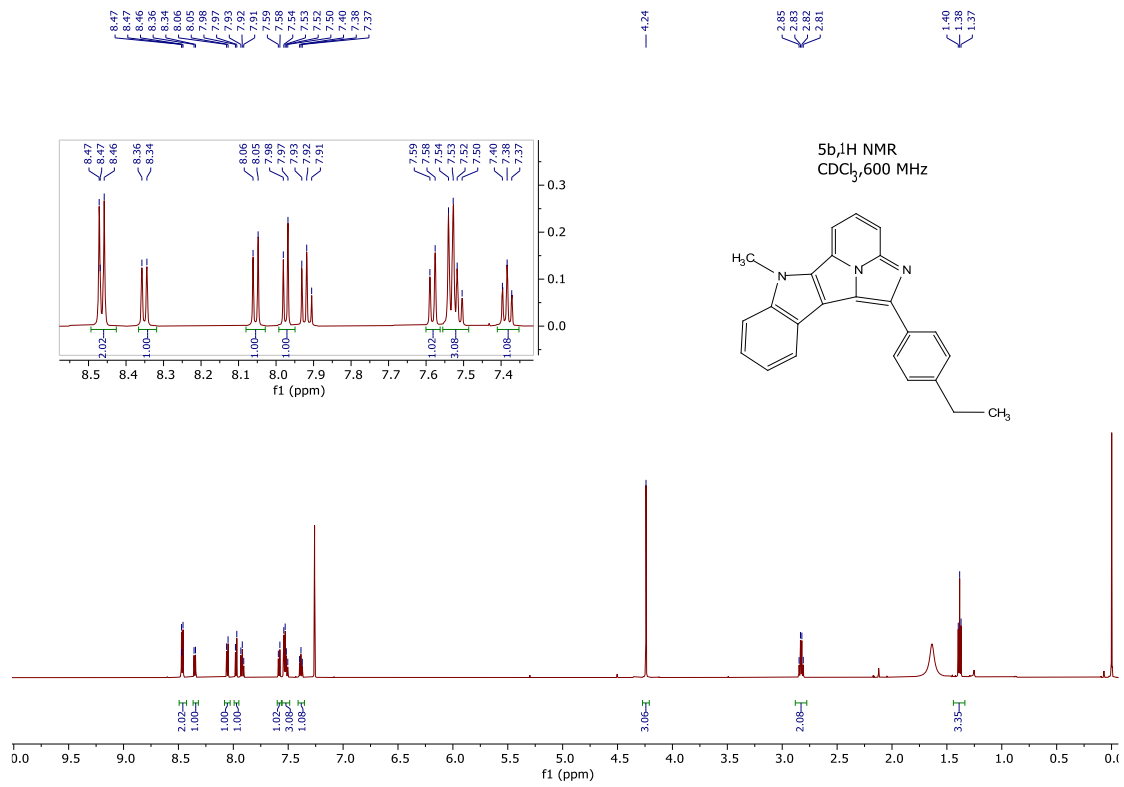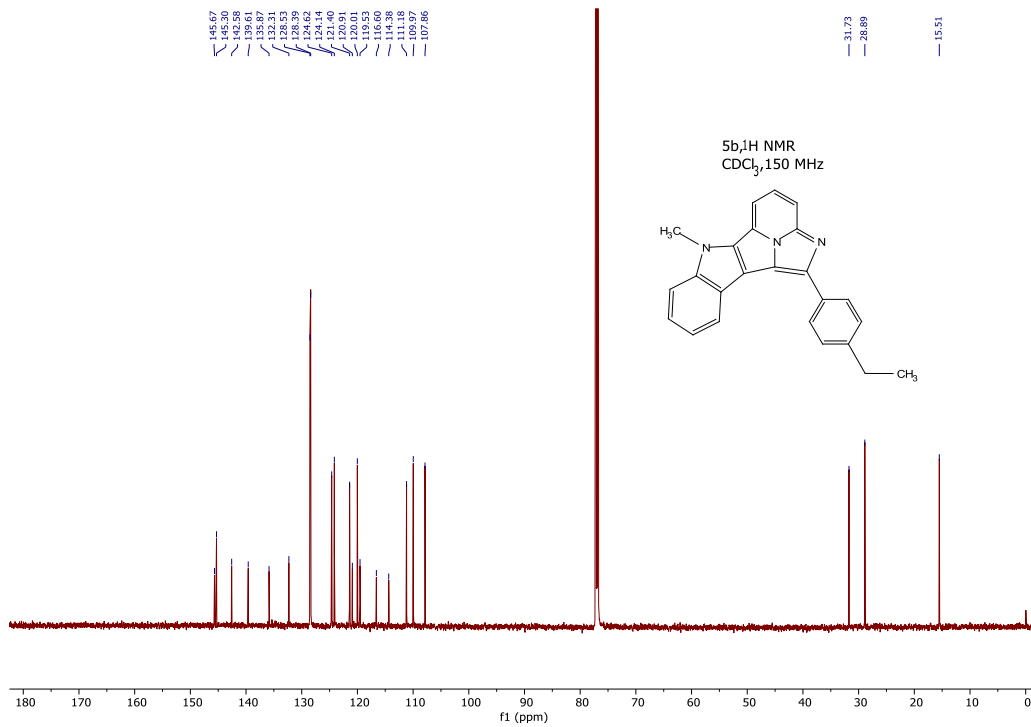

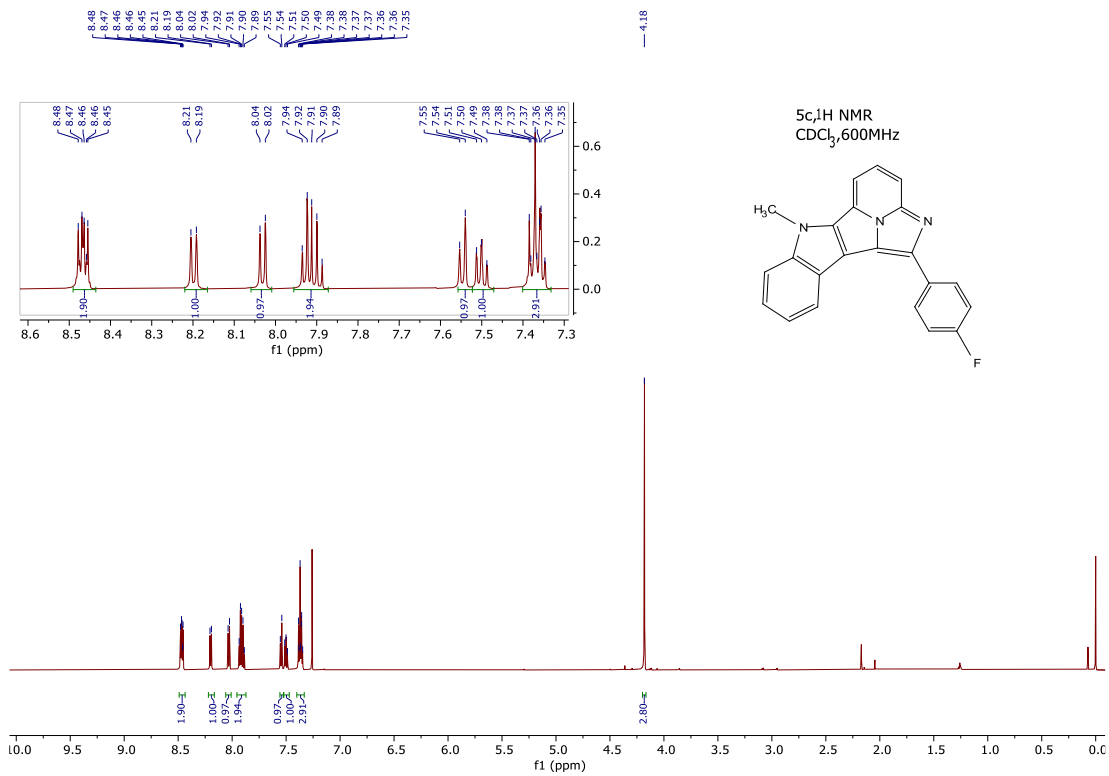

**<sup>1</sup>H NMR of 5c**

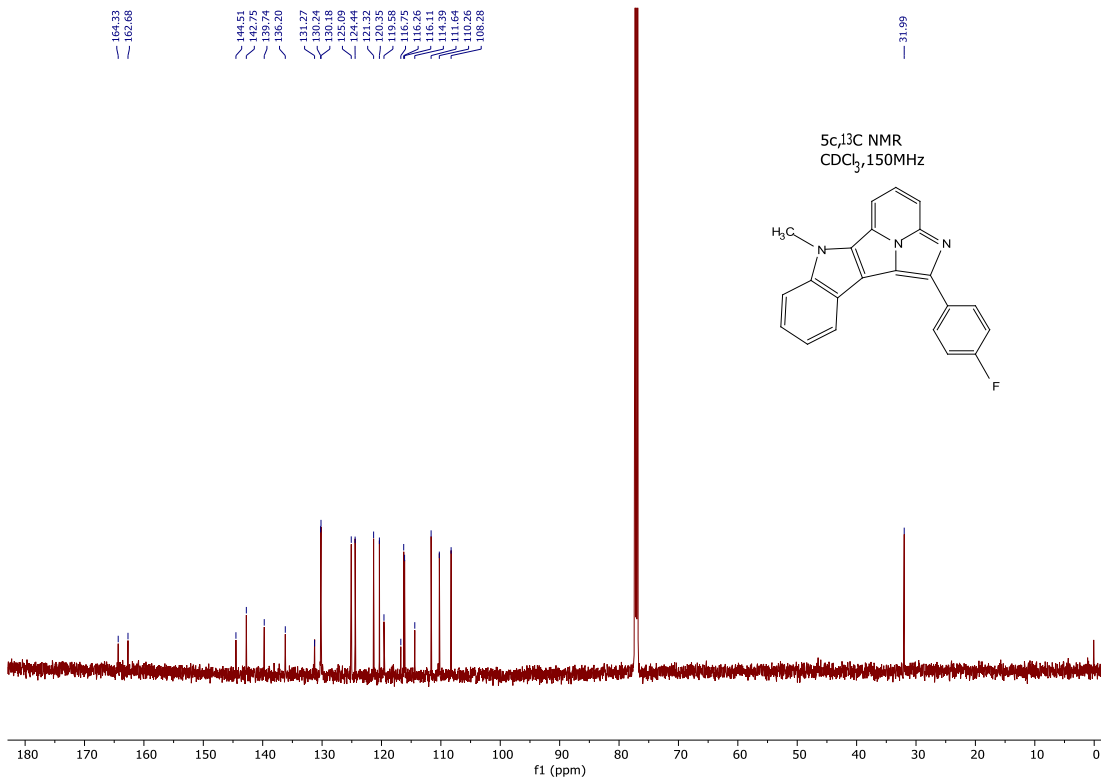

**<sup>13</sup>C NMR of 5c**



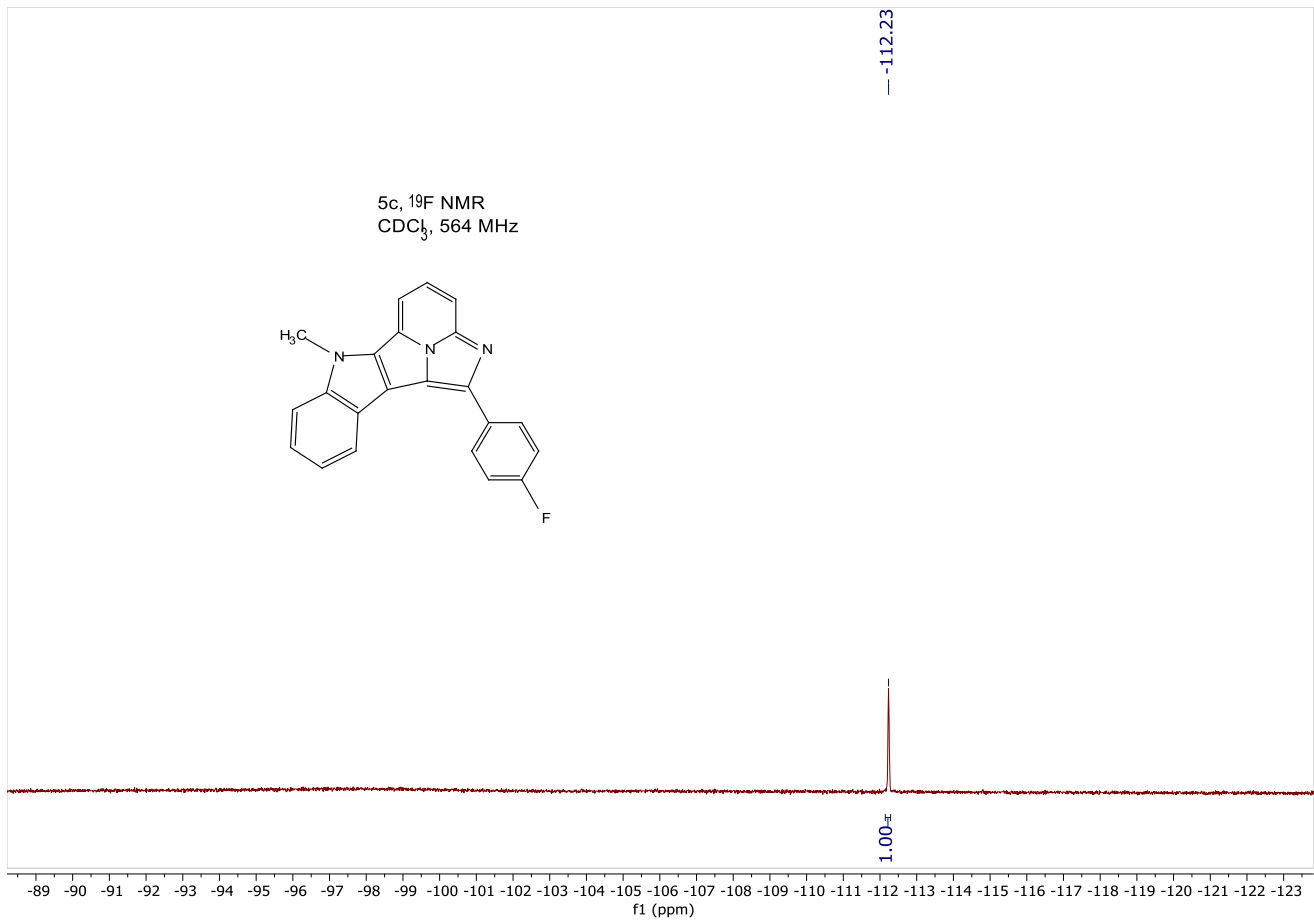

$^{19}\text{F}$  NMR of **5c**

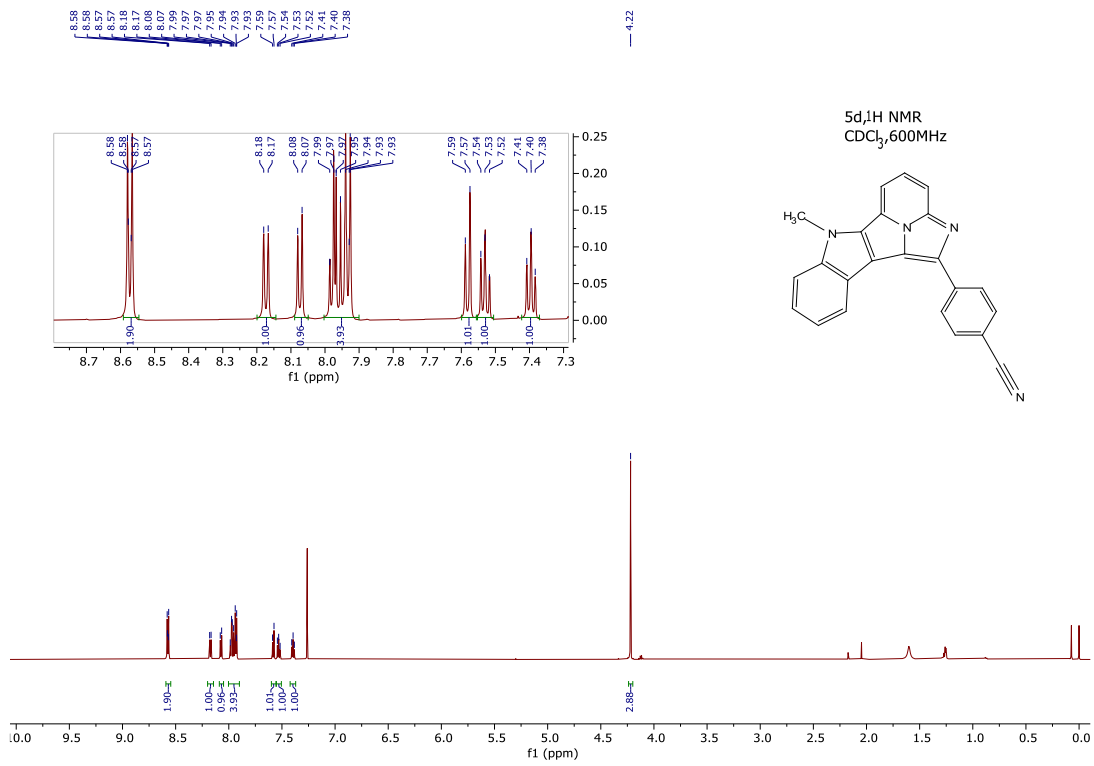

<sup>1</sup>H NMR of 5d

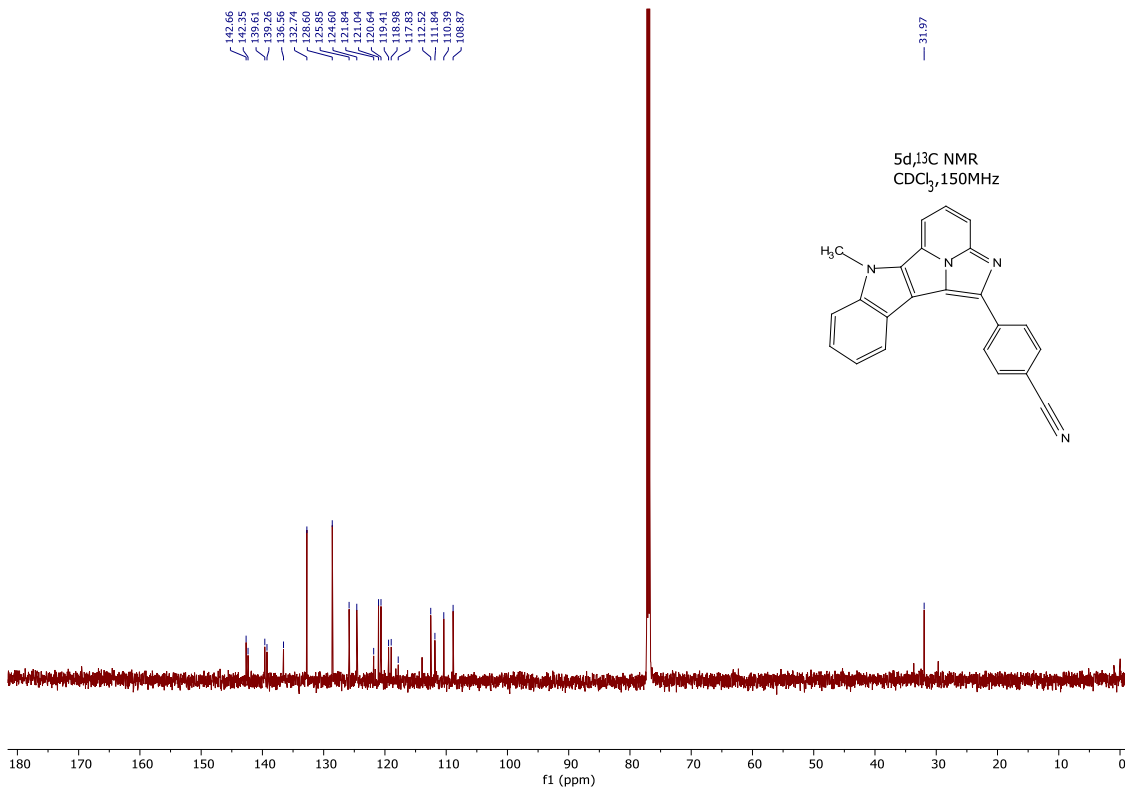

<sup>13</sup>C NMR of 5d

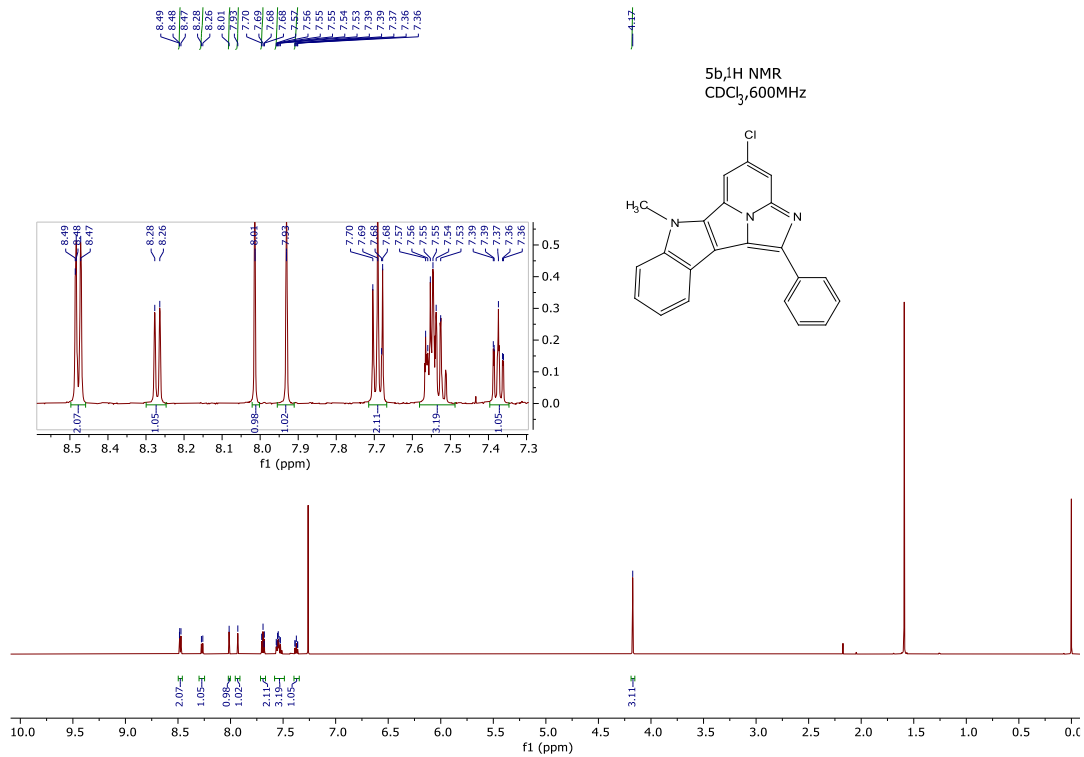

<sup>1</sup>H NMR of 5e

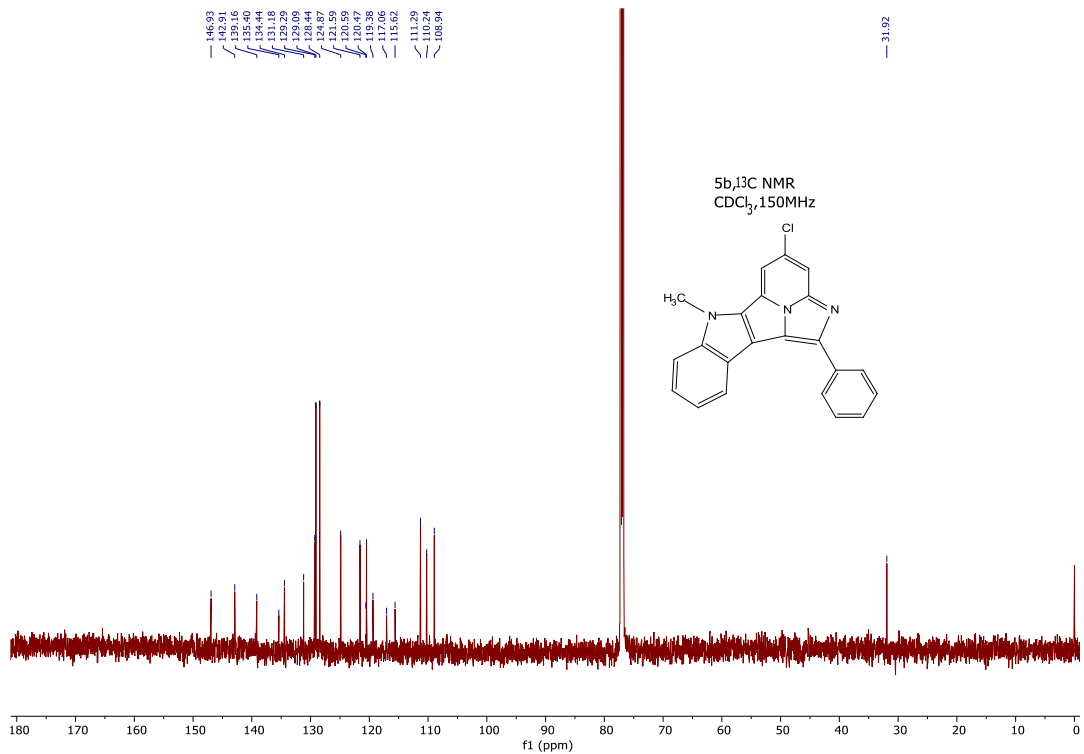

<sup>13</sup>C NMR of 5e

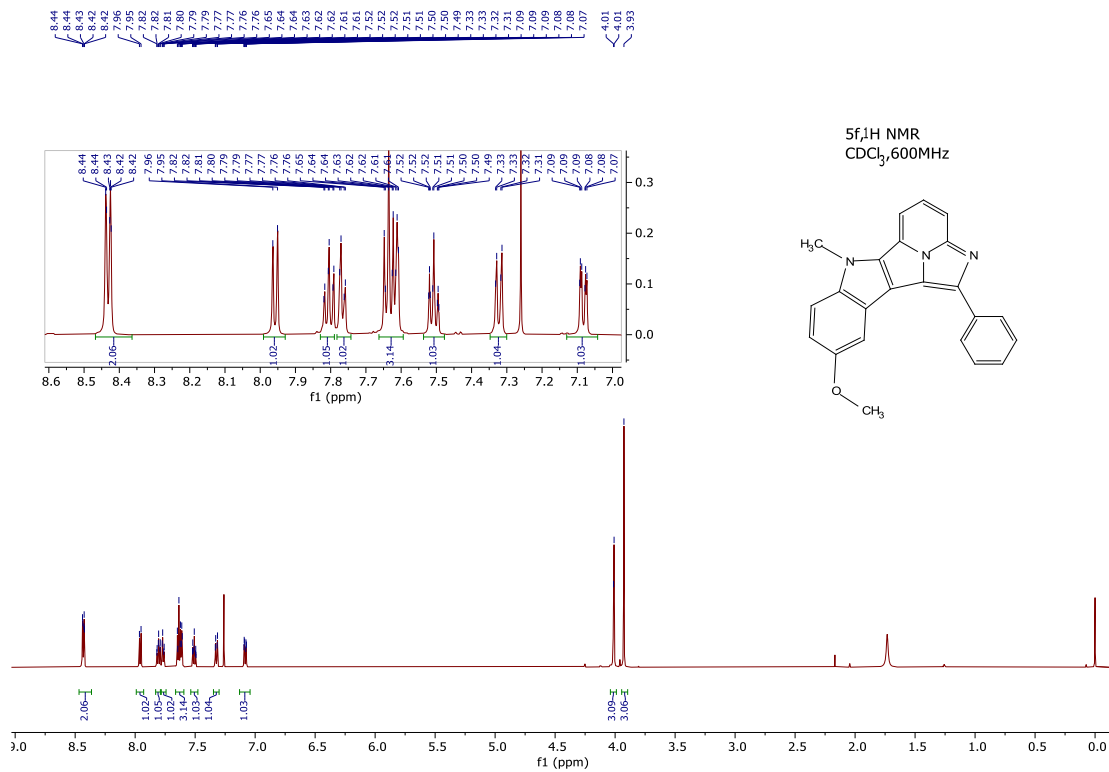

<sup>1</sup>H NMR of **5f**

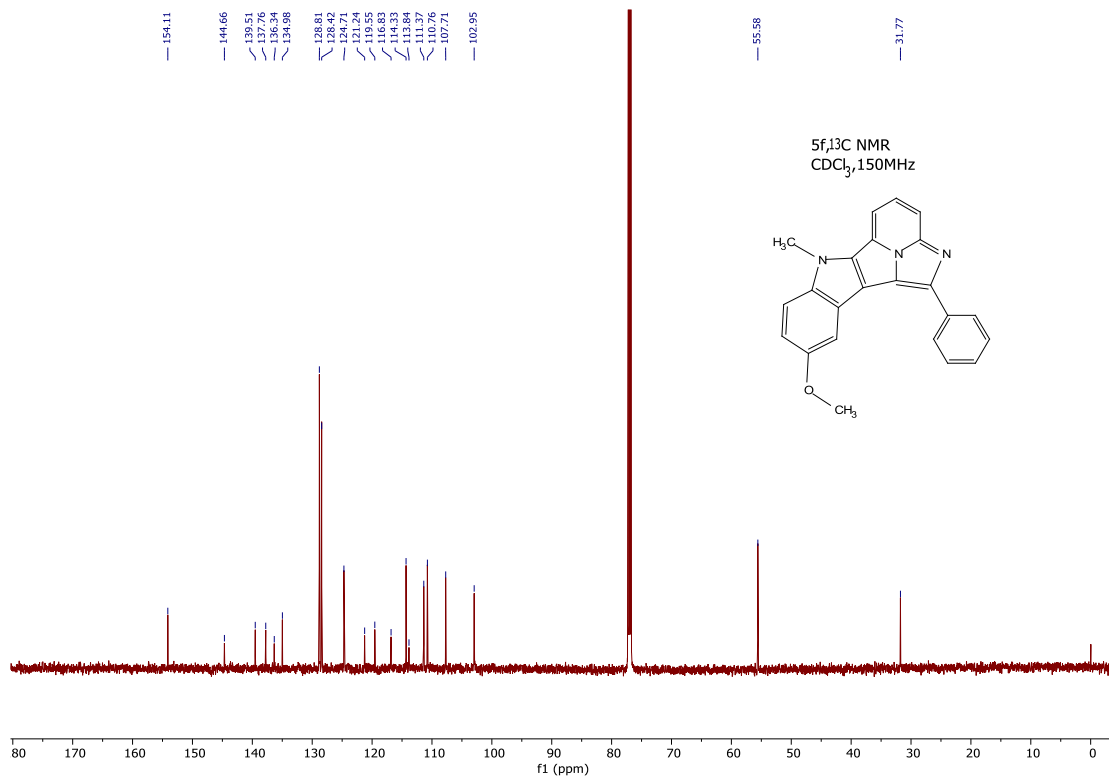

<sup>13</sup>C NMR of **5f**

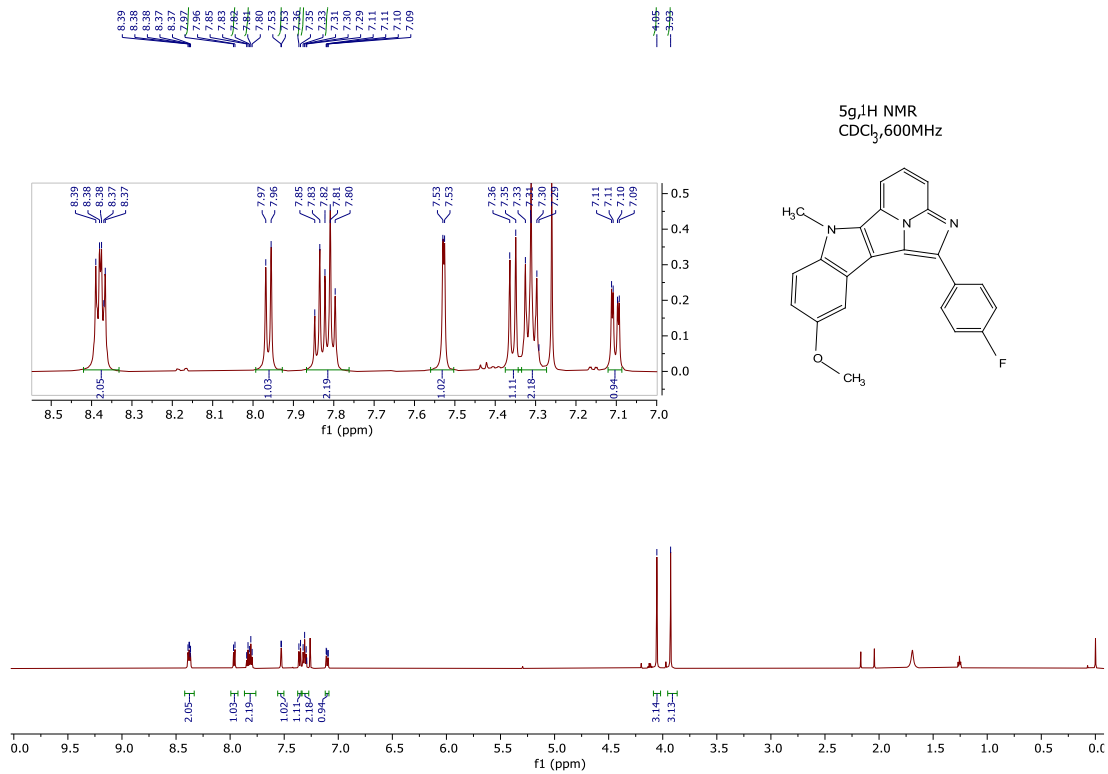

<sup>1</sup>H NMR of 5g

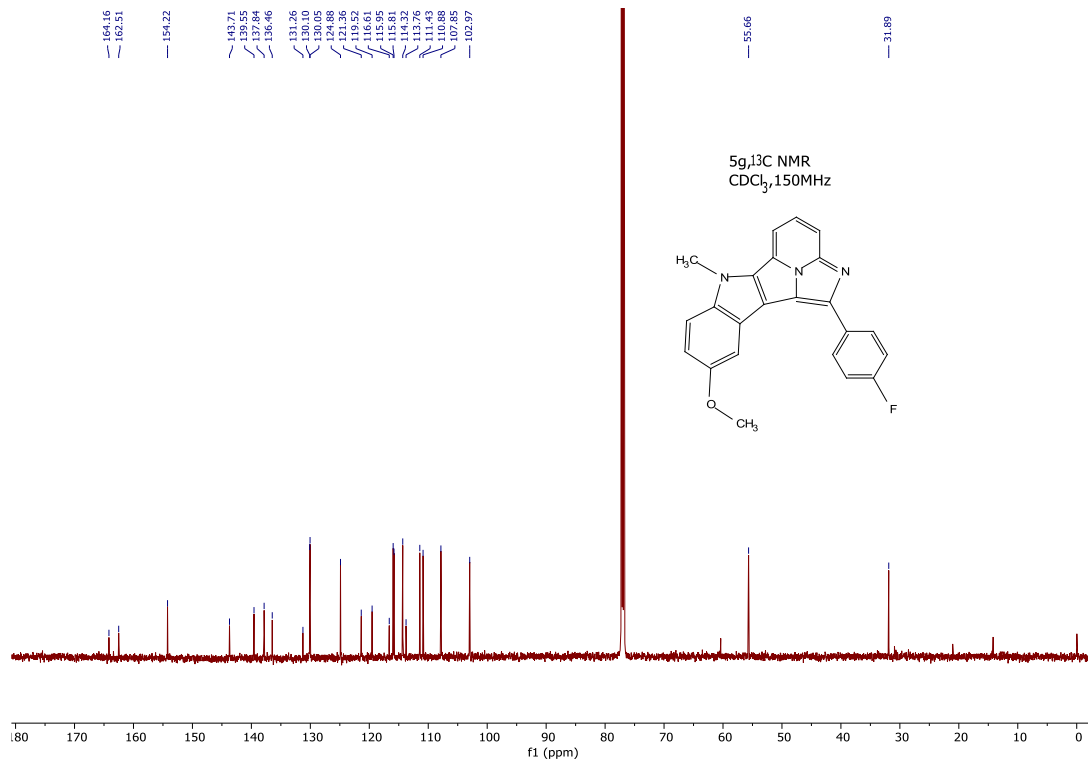

<sup>13</sup>C NMR of 5g

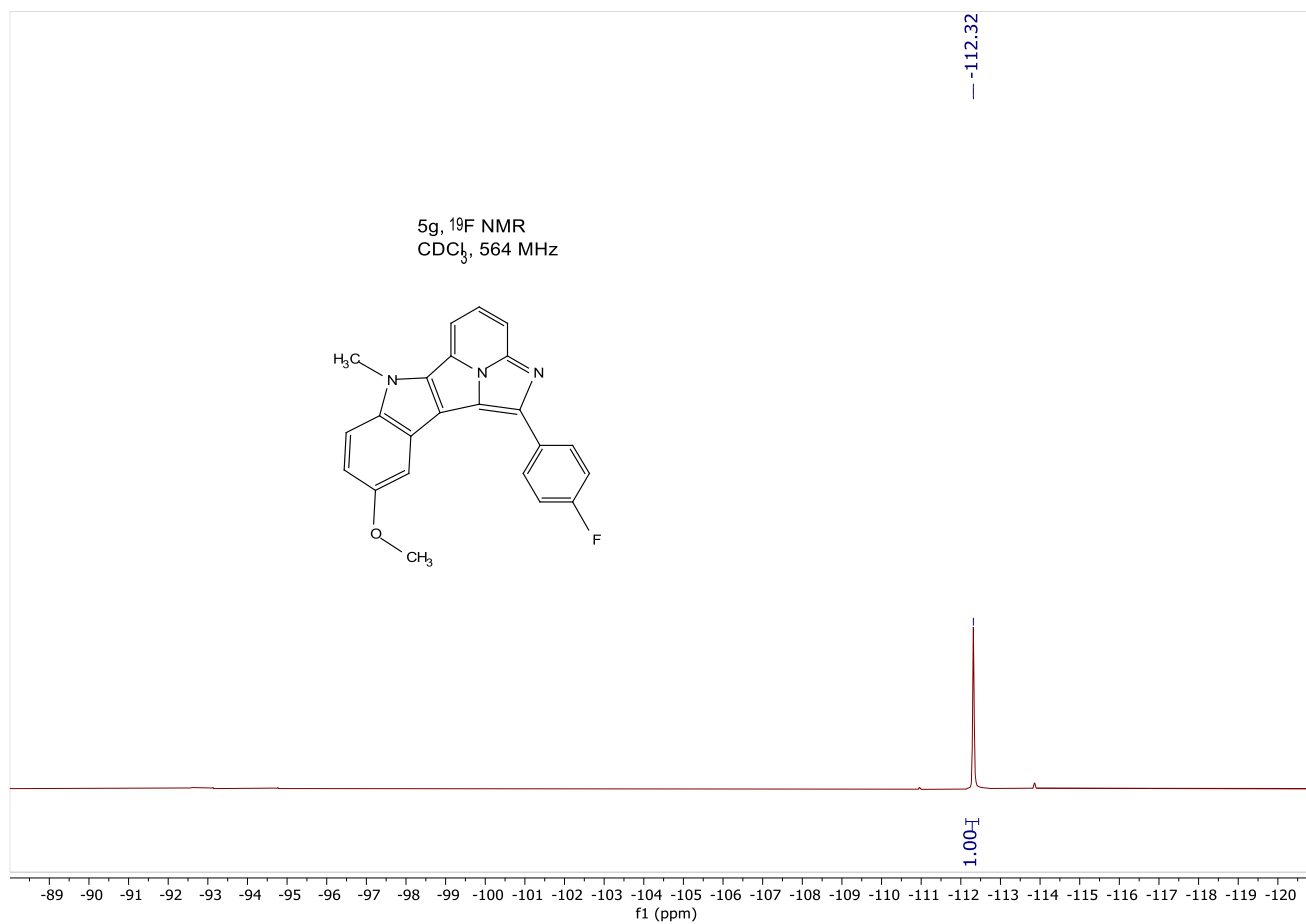

$^{19}\text{F}$  NMR of 5g

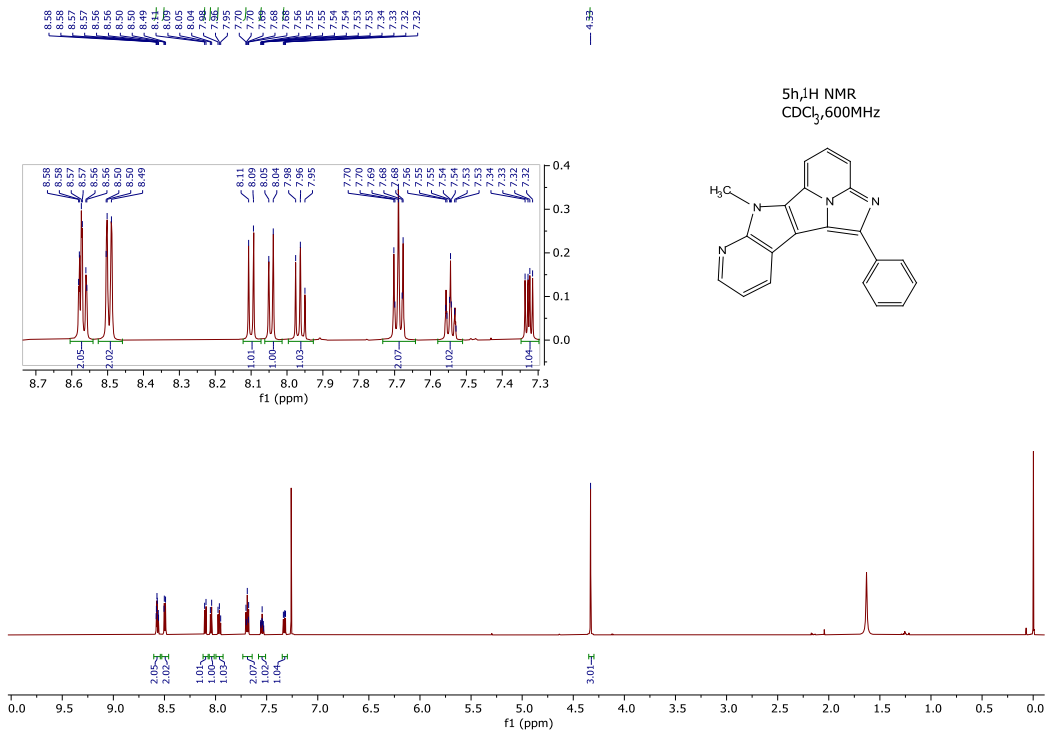

**<sup>1</sup>H NMR of 5h**

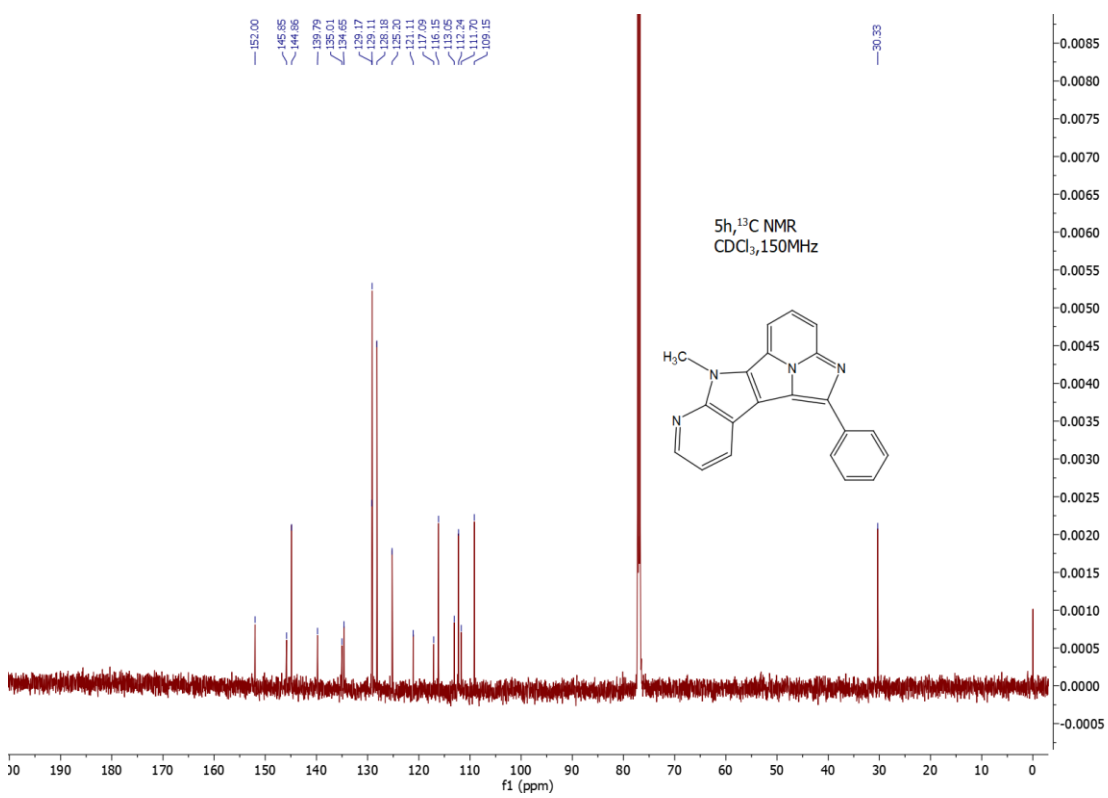

**<sup>13</sup>C NMR of 5h**

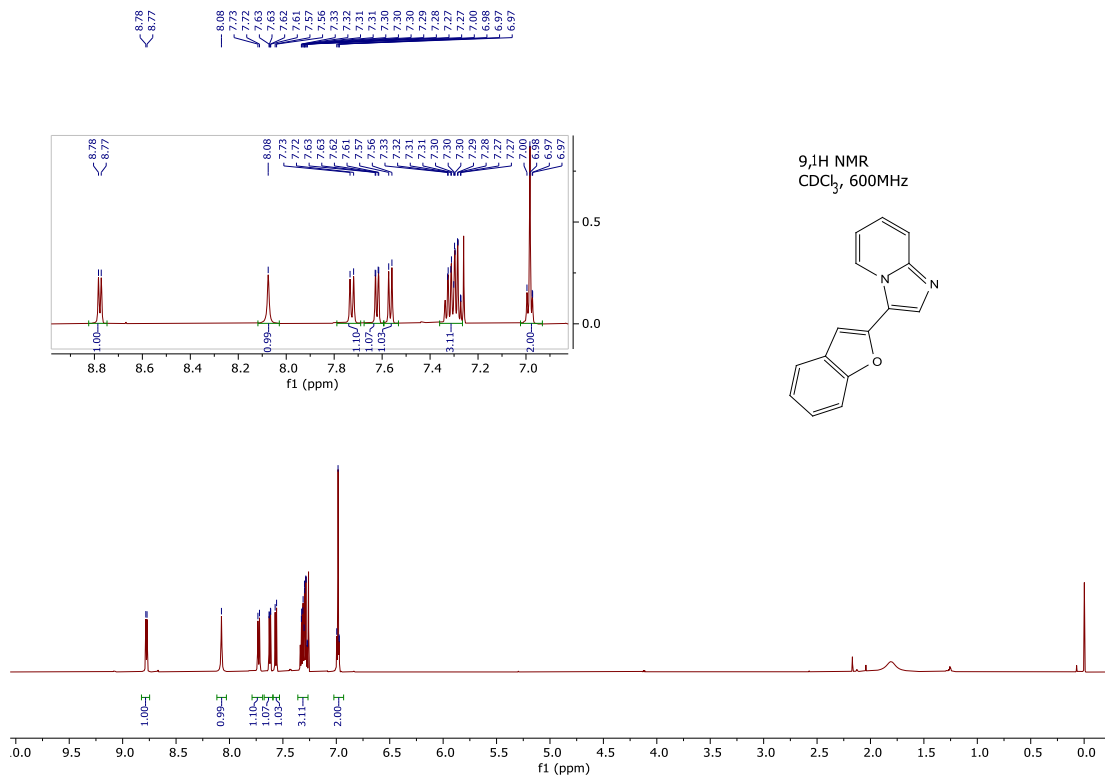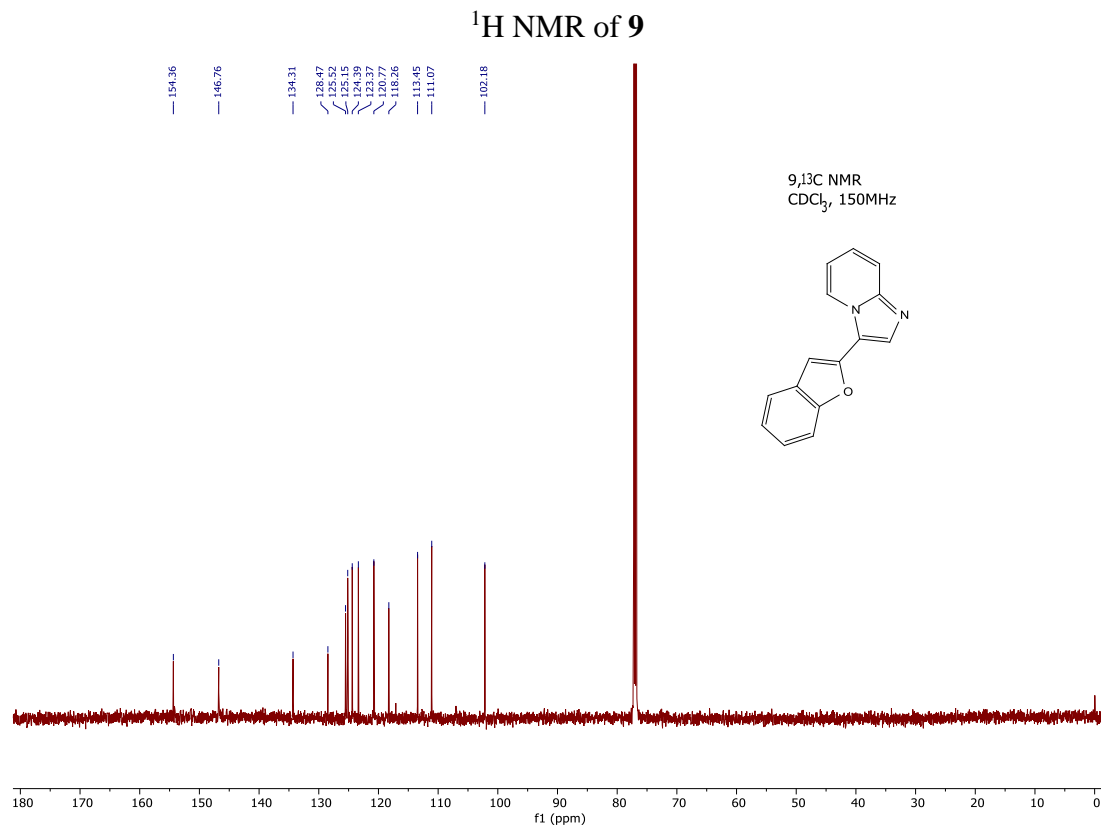

**<sup>13</sup>C NMR of 9**



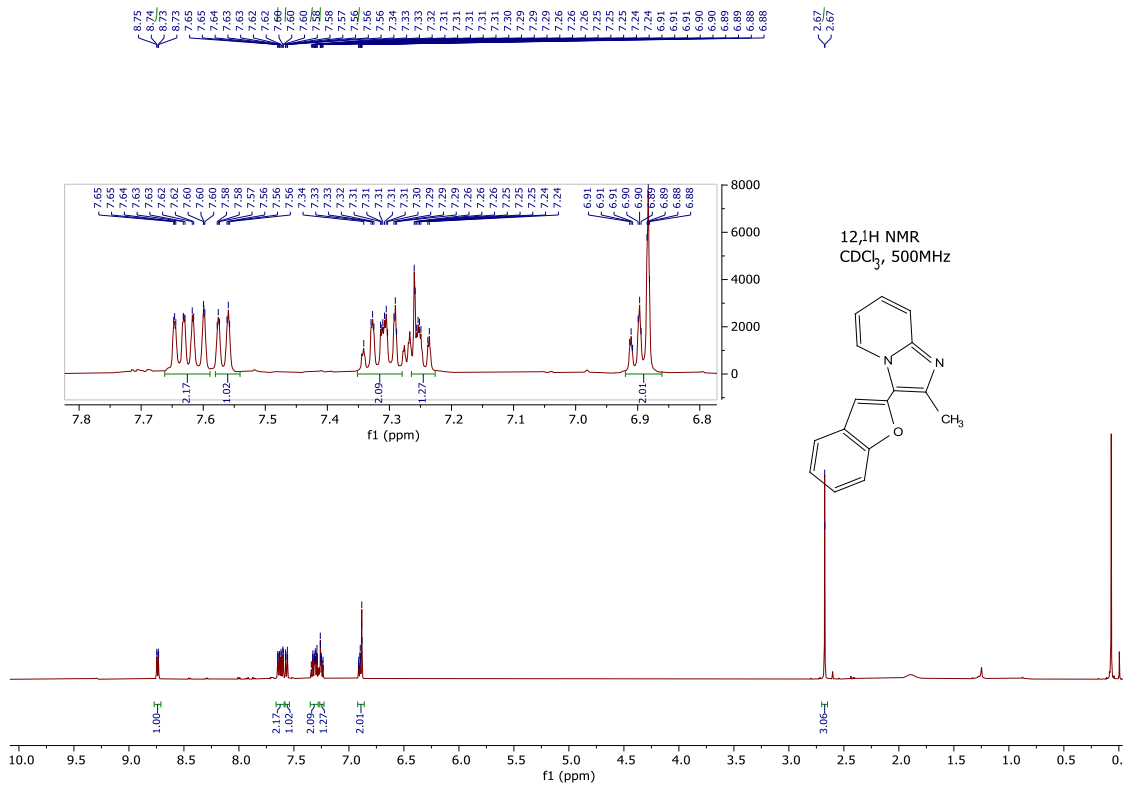

<sup>1</sup>H NMR of 12

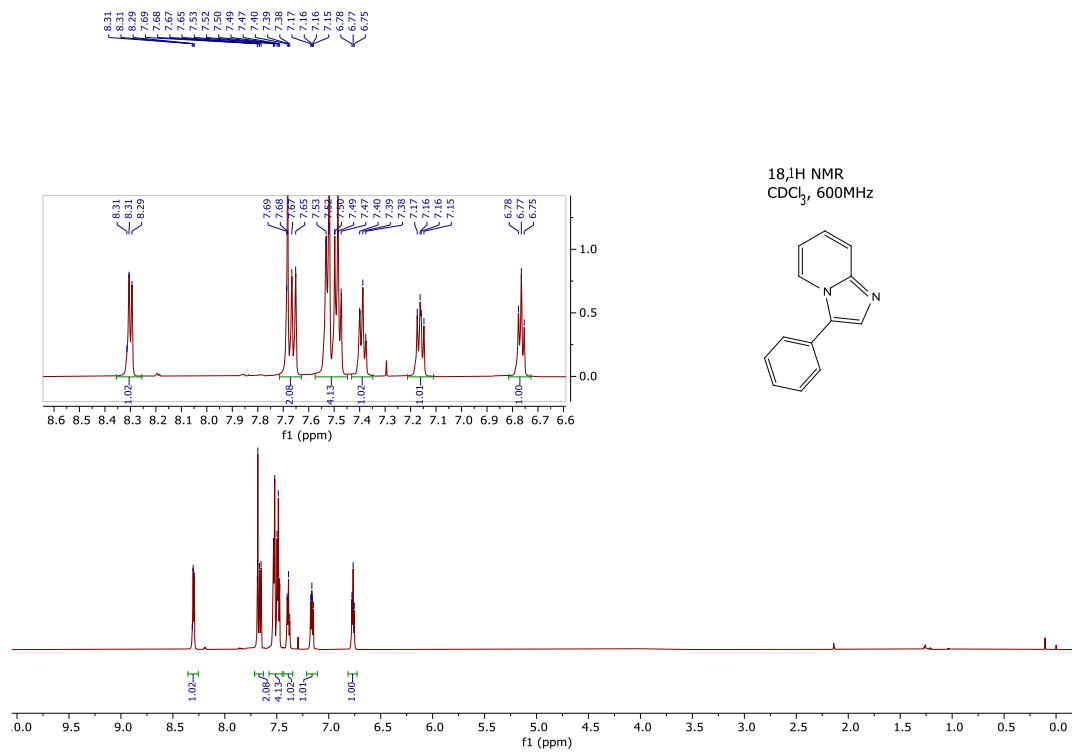

<sup>1</sup>H NMR of 18

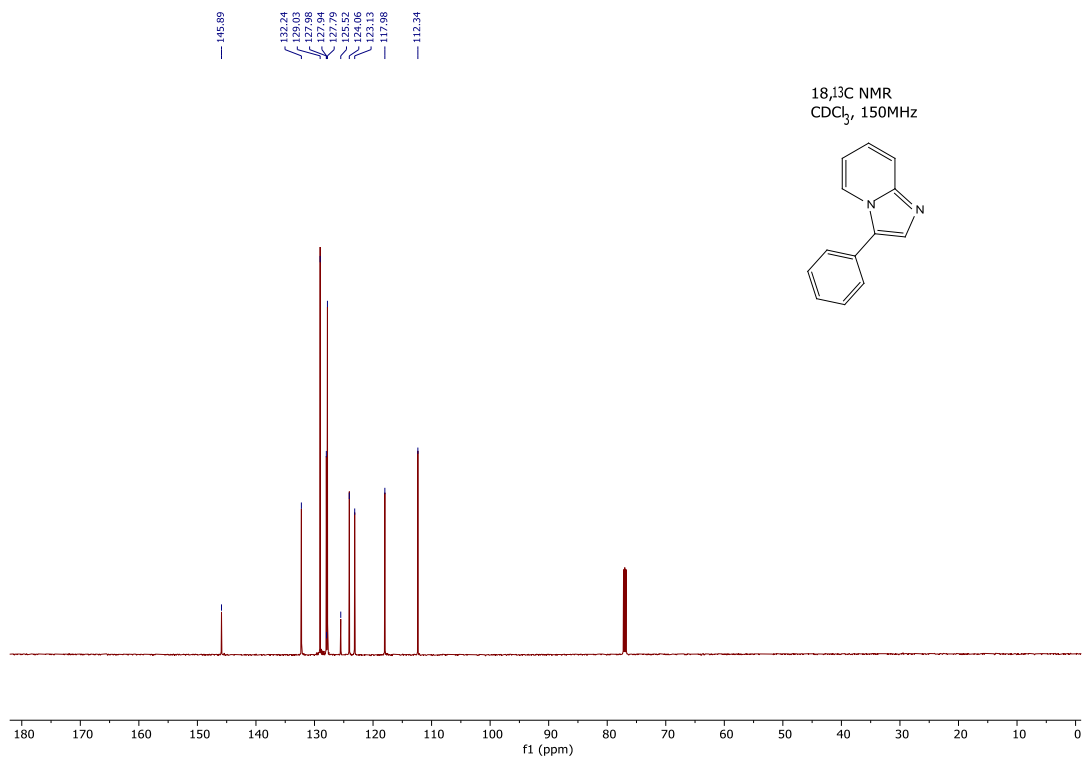

<sup>13</sup>C NMR of **18**

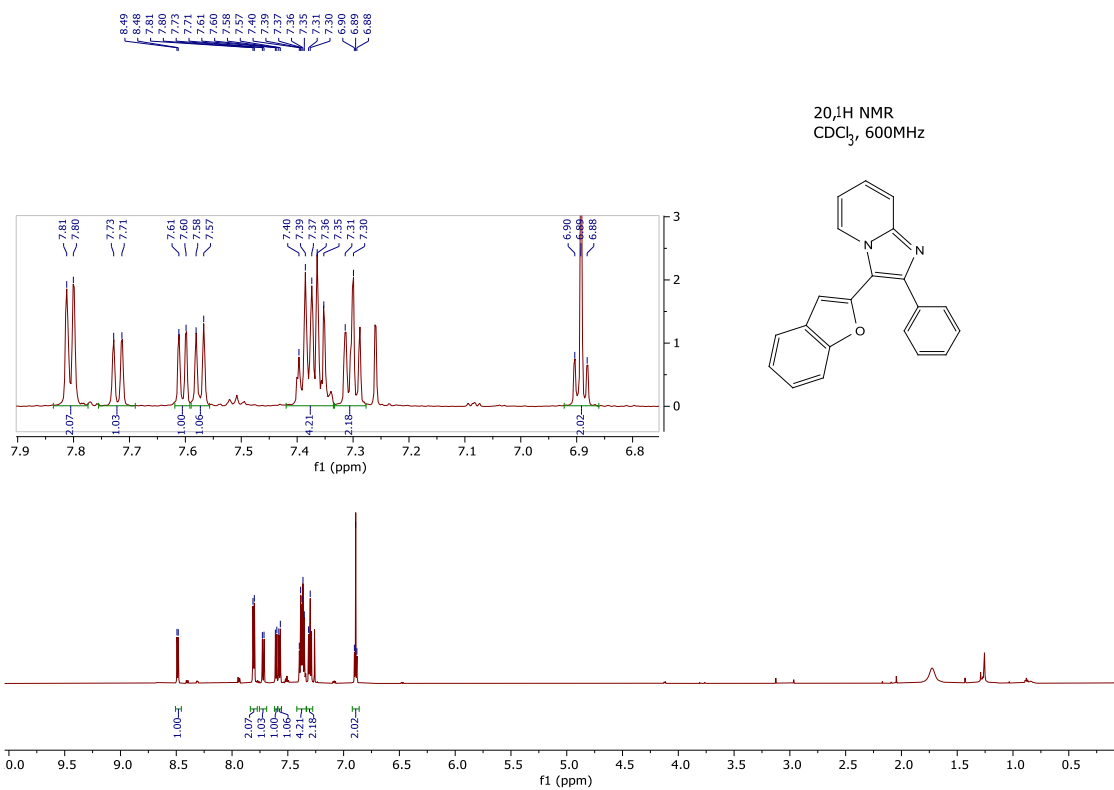

<sup>1</sup>H NMR of **20**

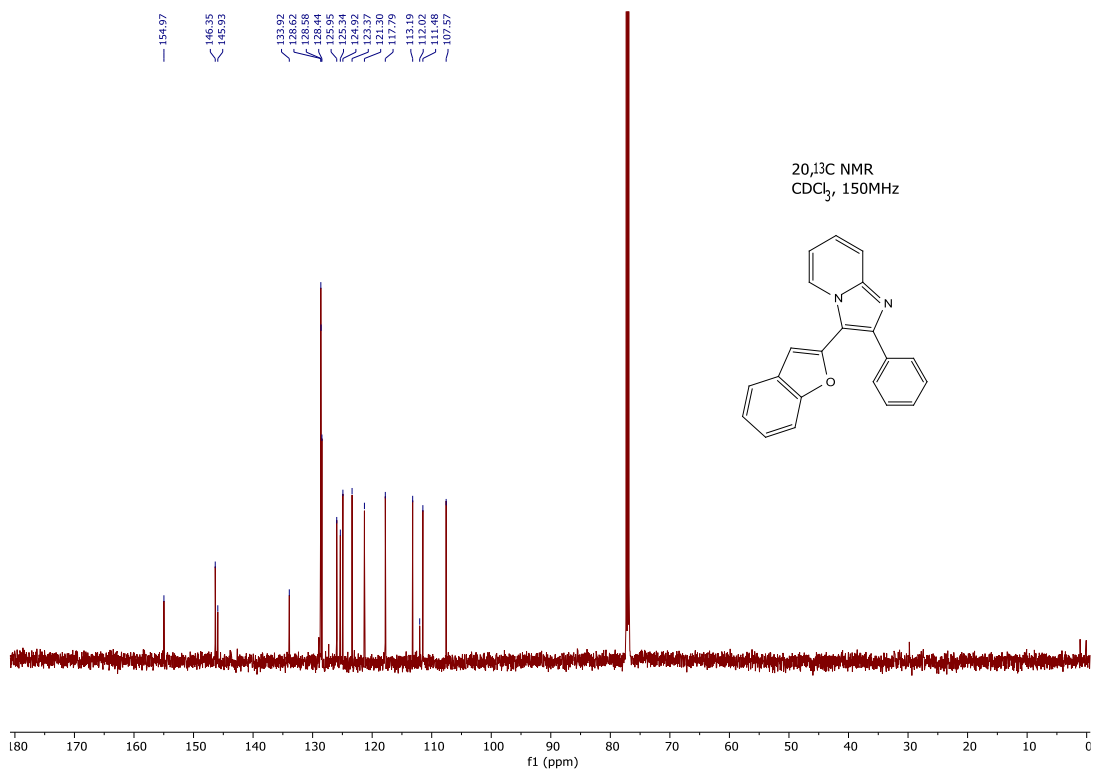

$^{13}\text{C}$  NMR of 20

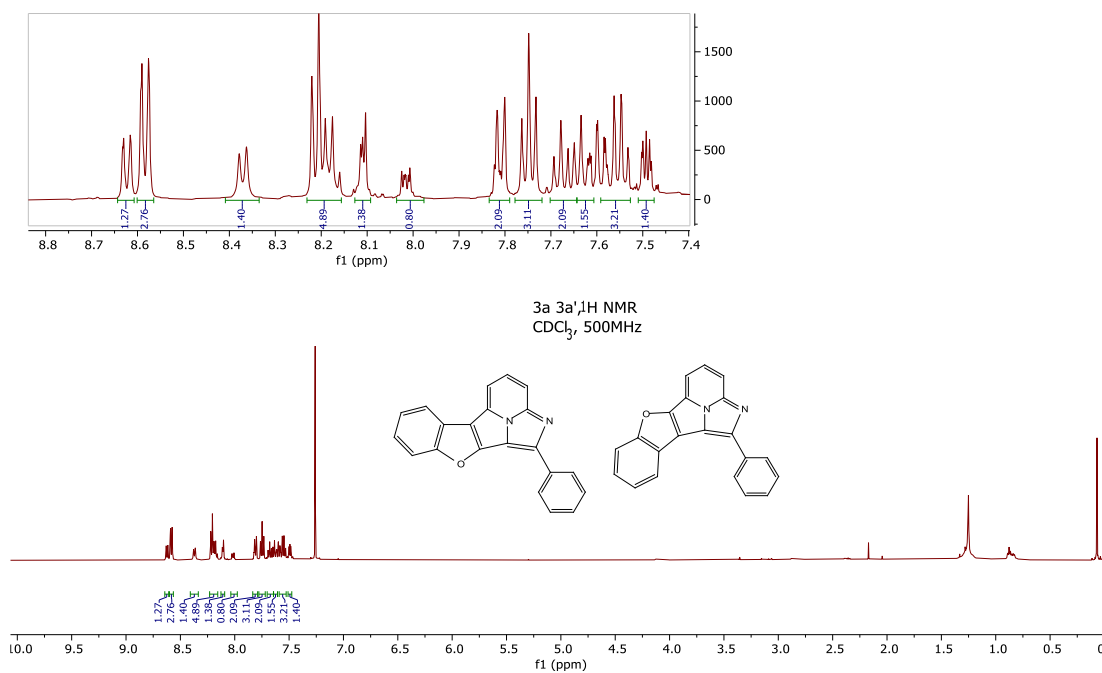

$^1\text{H}$  NMR of 3a and 3a' (inseparable mixture)
